# Supplementary material for: Systems Bioinformatics Reveals Possible Relationship between COVID-19 and the Development of Neurological Diseases and Neuropsychiatric Disorders
Source: MDPI journal article supplement (doi:10.3390/v14102270), 2022-10-16
Supplement: s1 [file s1]

## Prion Disease and COVID-19

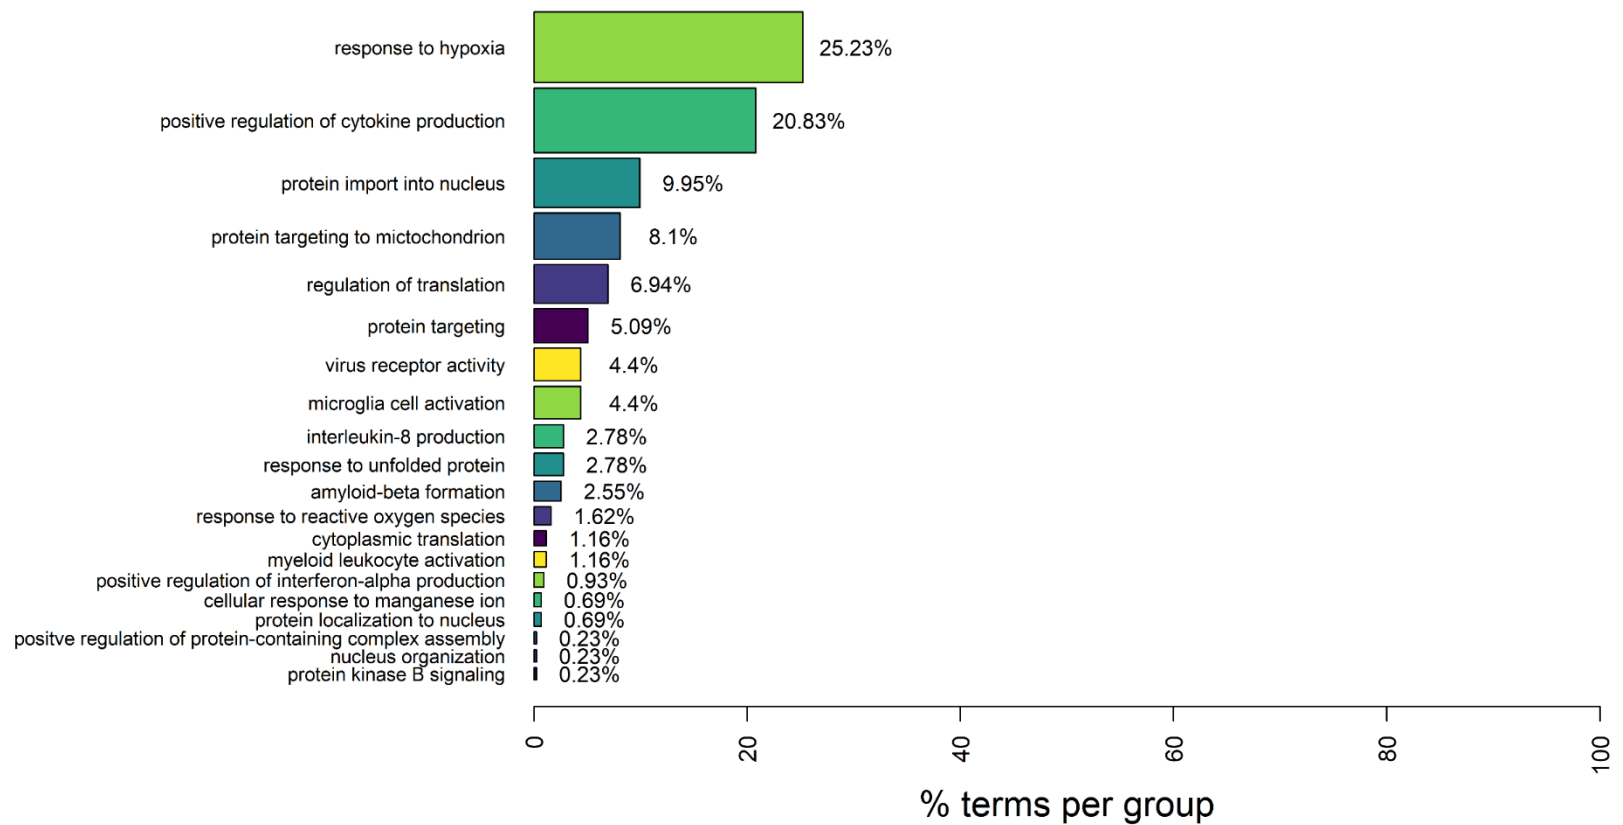

**Supplementary Figure S1:** Functional enrichment analysis results of the overlapping GO biological processes between Prion Disease and COVID-19, indicating the functional groups and the percentage of terms that belong to each group.

## Bipolar Disorder and COVID-19

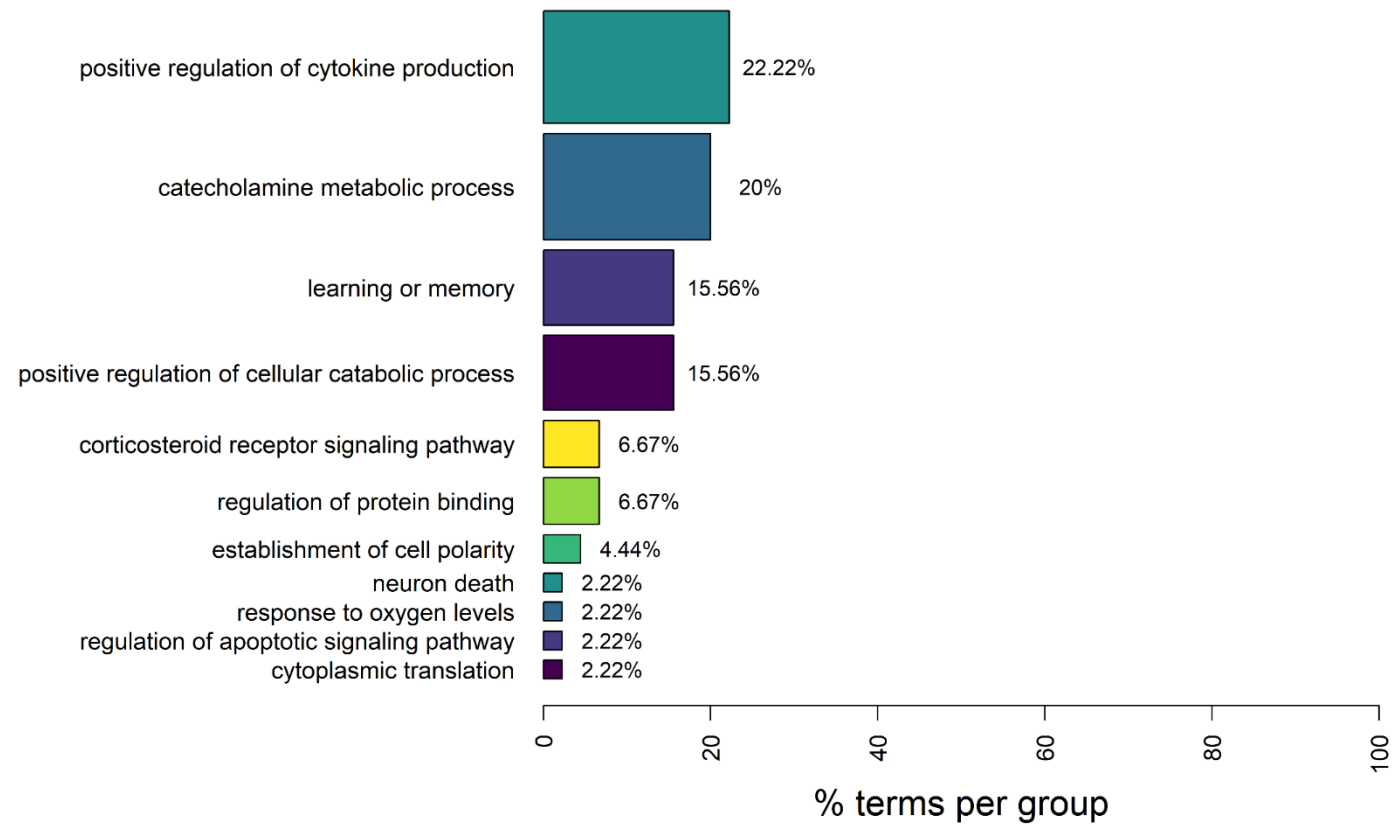

**Supplementary Figure S2:** Functional enrichment analysis results of the overlapping GO biological processes between Bipolar Disorder and COVID-19, indicating the functional groups and the percentage of terms that belong to each group.

## Cerebellar Ataxia and COVID-19

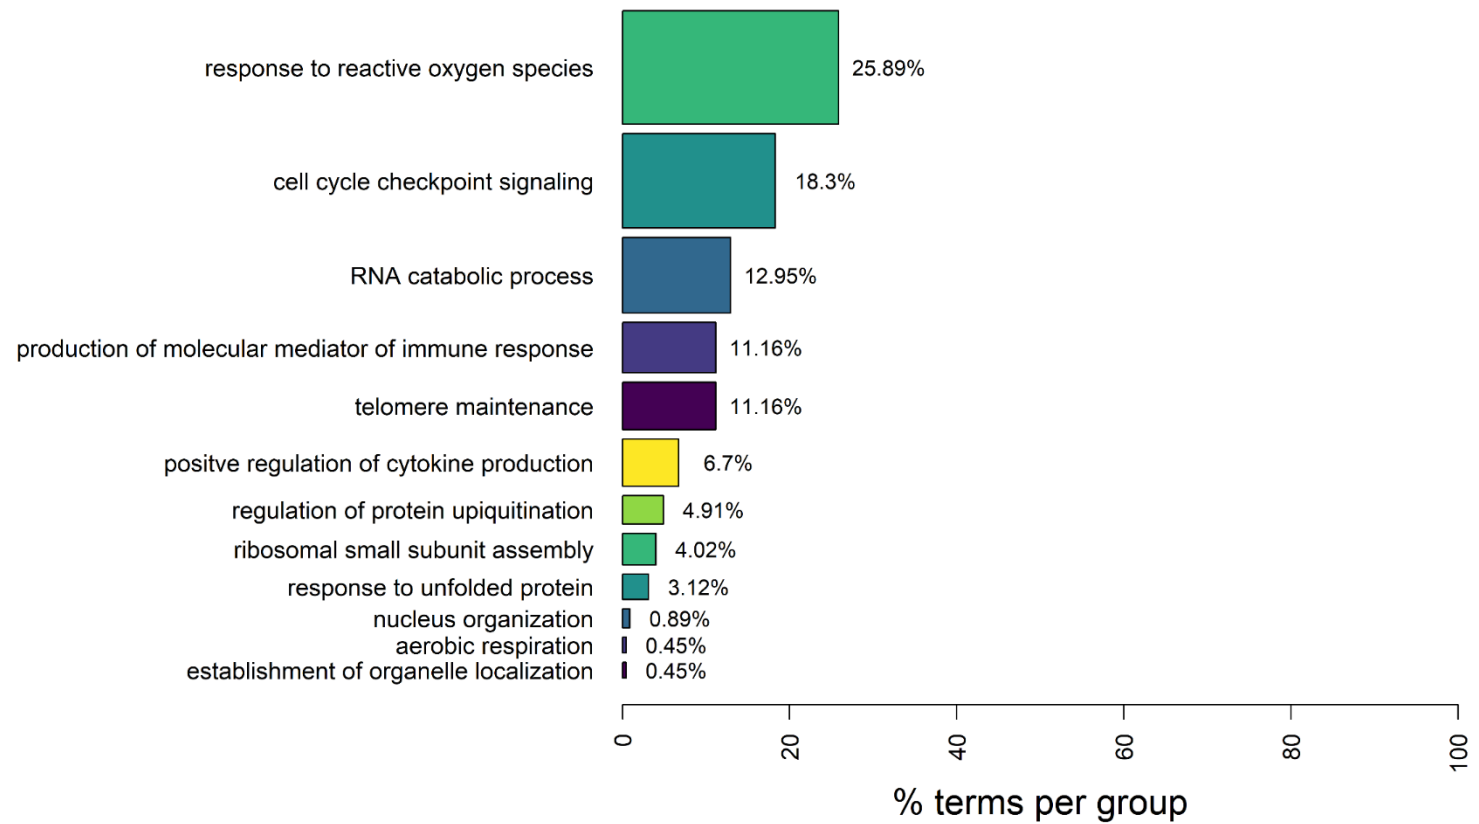

**Supplementary Figure S3:** Functional enrichment analysis results of the overlapping GO biological processes between Cerebellar Ataxia and COVID-19, indicating the functional groups and the percentage of terms that belong to each group.

## Myasthenia Gravis and COVID-19

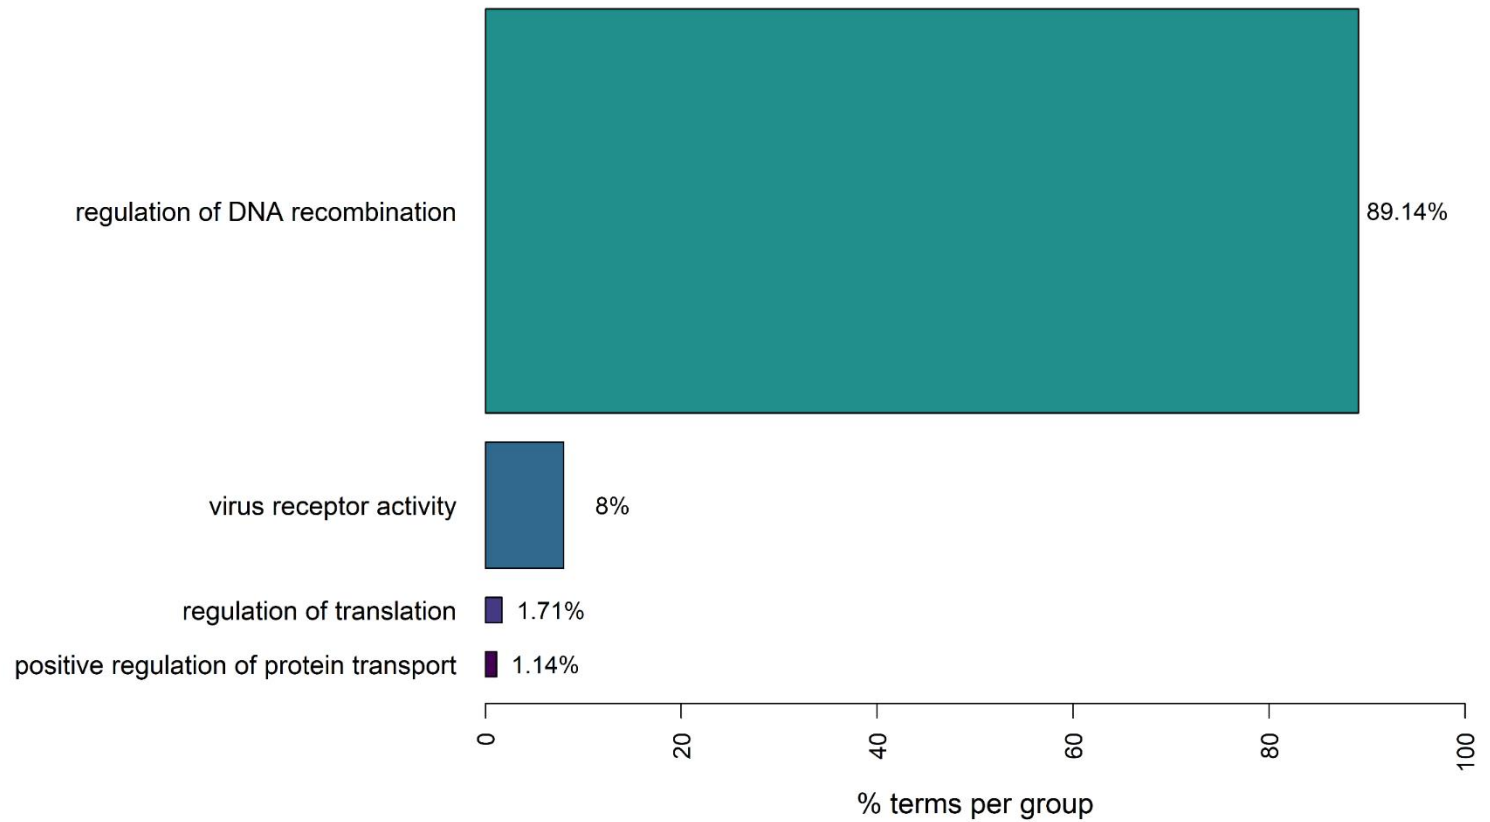

**Supplementary Figure S4:** Functional enrichment analysis results of the overlapping GO biological processes between Myasthenia Gravis and COVID-19, indicating the functional groups and the percentage of terms that belong to each group.

## Multiple Sclerosis and COVID-19

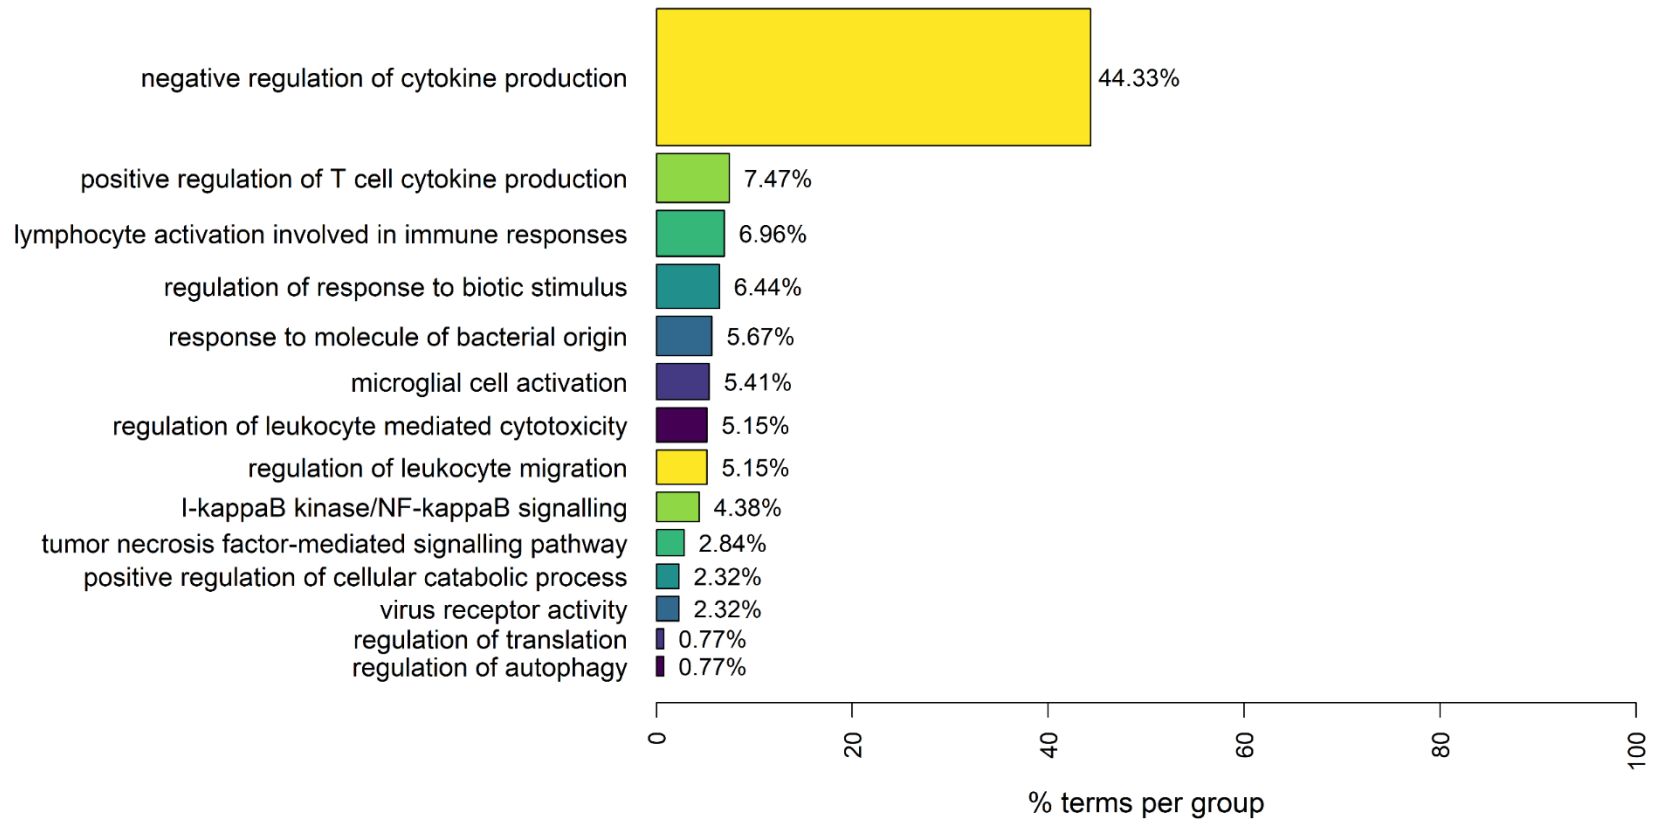

**Supplementary Figure S5:** Functional enrichment analysis results of the overlapping GO biological processes between Multiple Sclerosis and COVID-19, indicating the functional groups and the percentage of terms that belong to each group.

## Schizophrenia and COVID-19

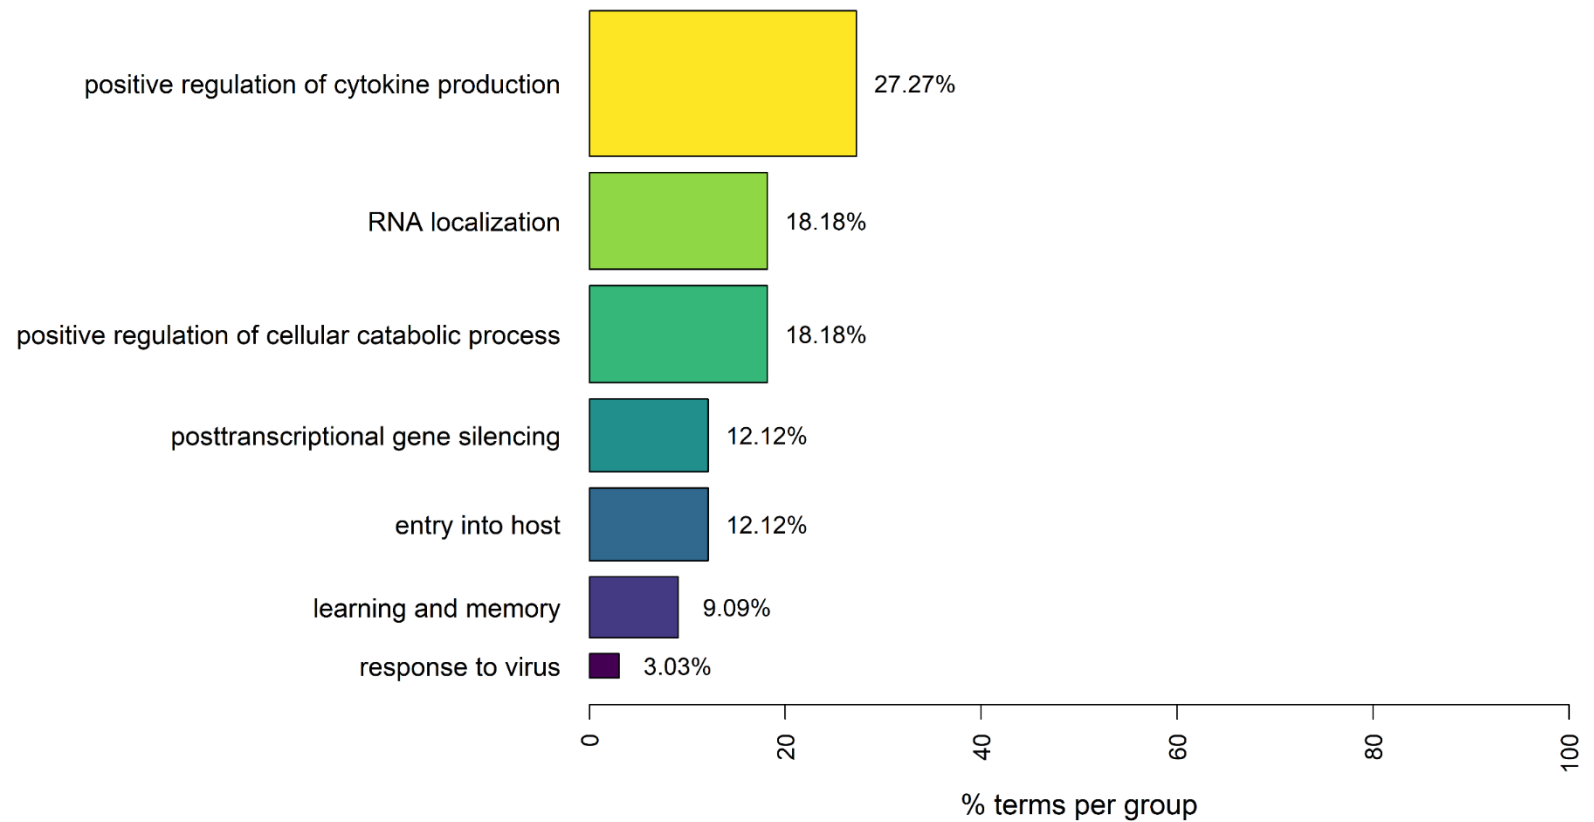

**Supplementary Figure S6:** Functional enrichment analysis results of the overlapping GO biological processes between Schizophrenia Disorder and COVID-19, indicating the functional groups and the percentage of terms that belong to each group.

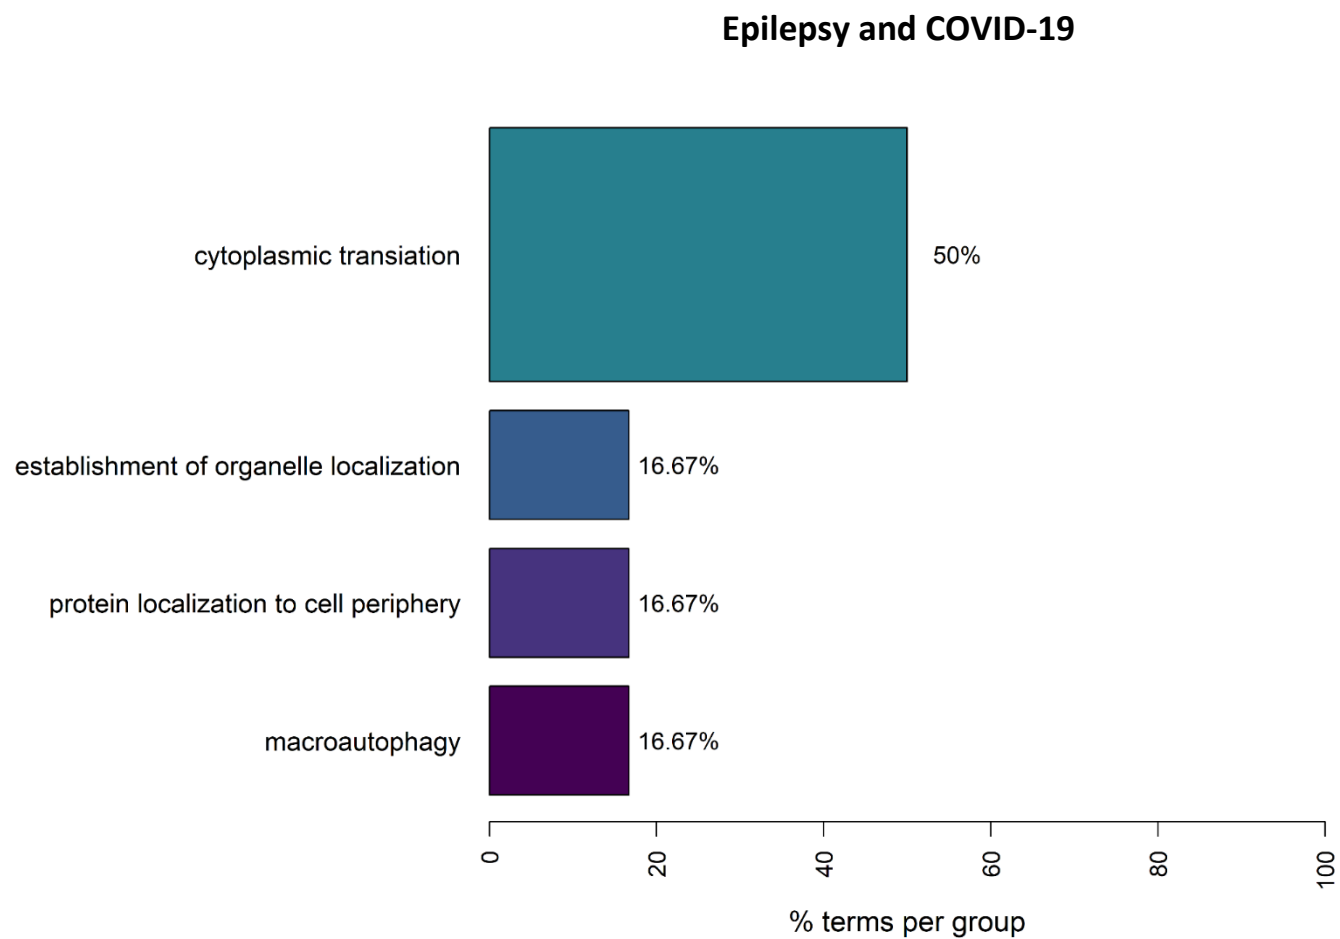

**Supplementary Figure S7:** Functional enrichment analysis results of the overlapping GO biological processes between Epilepsy and COVID-19, indicating the functional groups and the percentage of terms that belong to each group.

## Neurotic Disorder and COVID-19

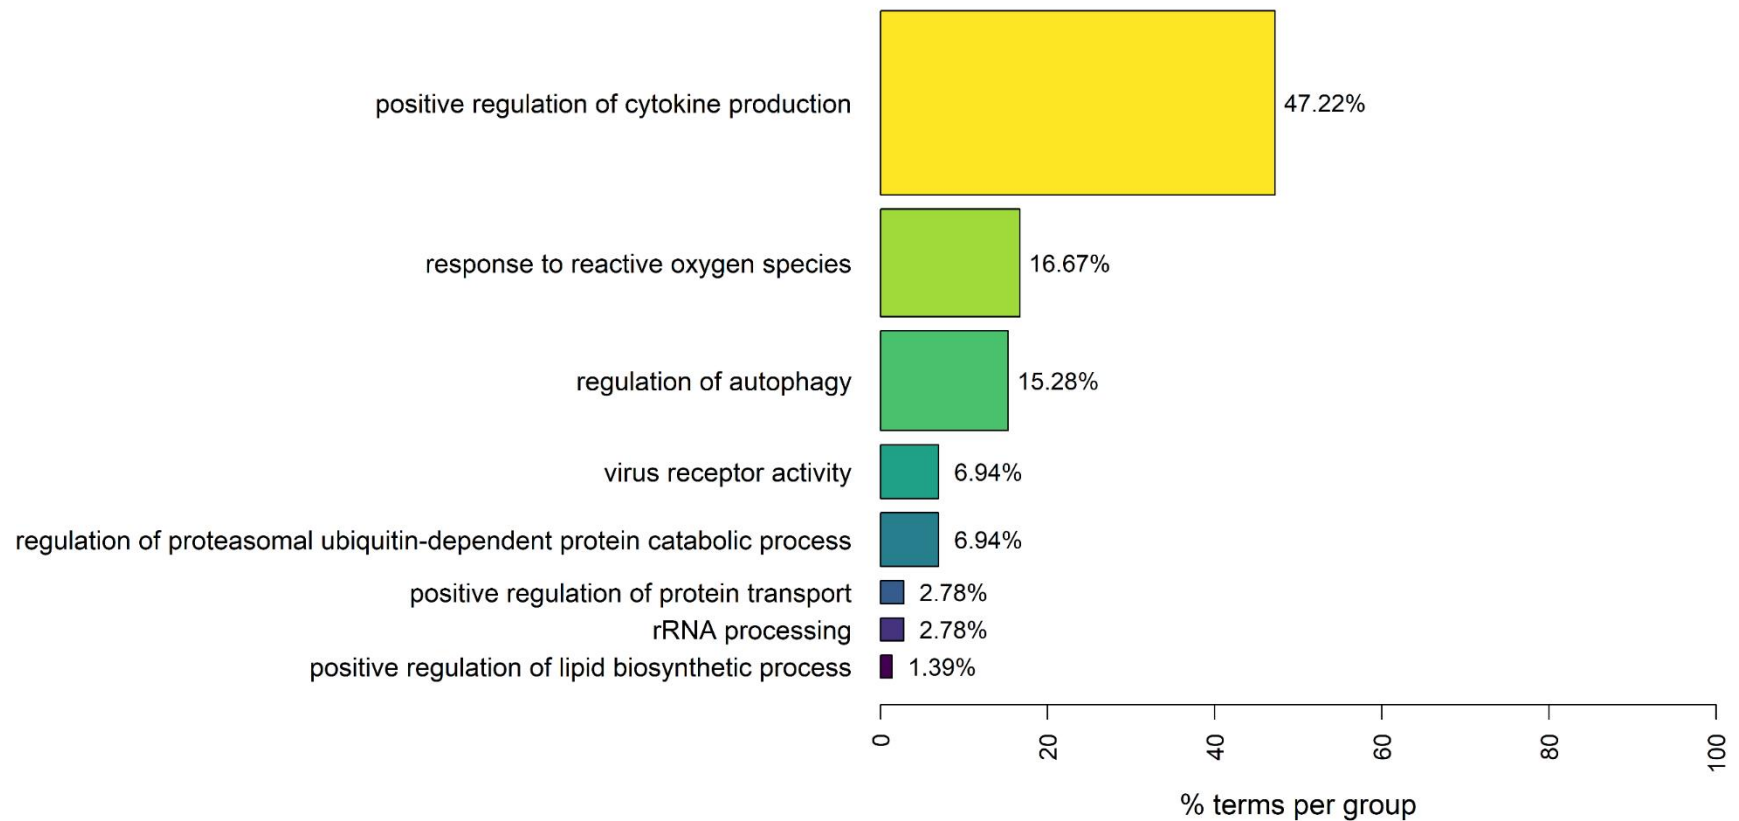

**Supplementary Figure S8:** Functional enrichment analysis results of the overlapping GO biological processes between Neurotic Disorder and COVID-19, indicating the functional groups and the percentage of terms that belong to each group.



## Guillain-Barré Syndrome and COVID-19

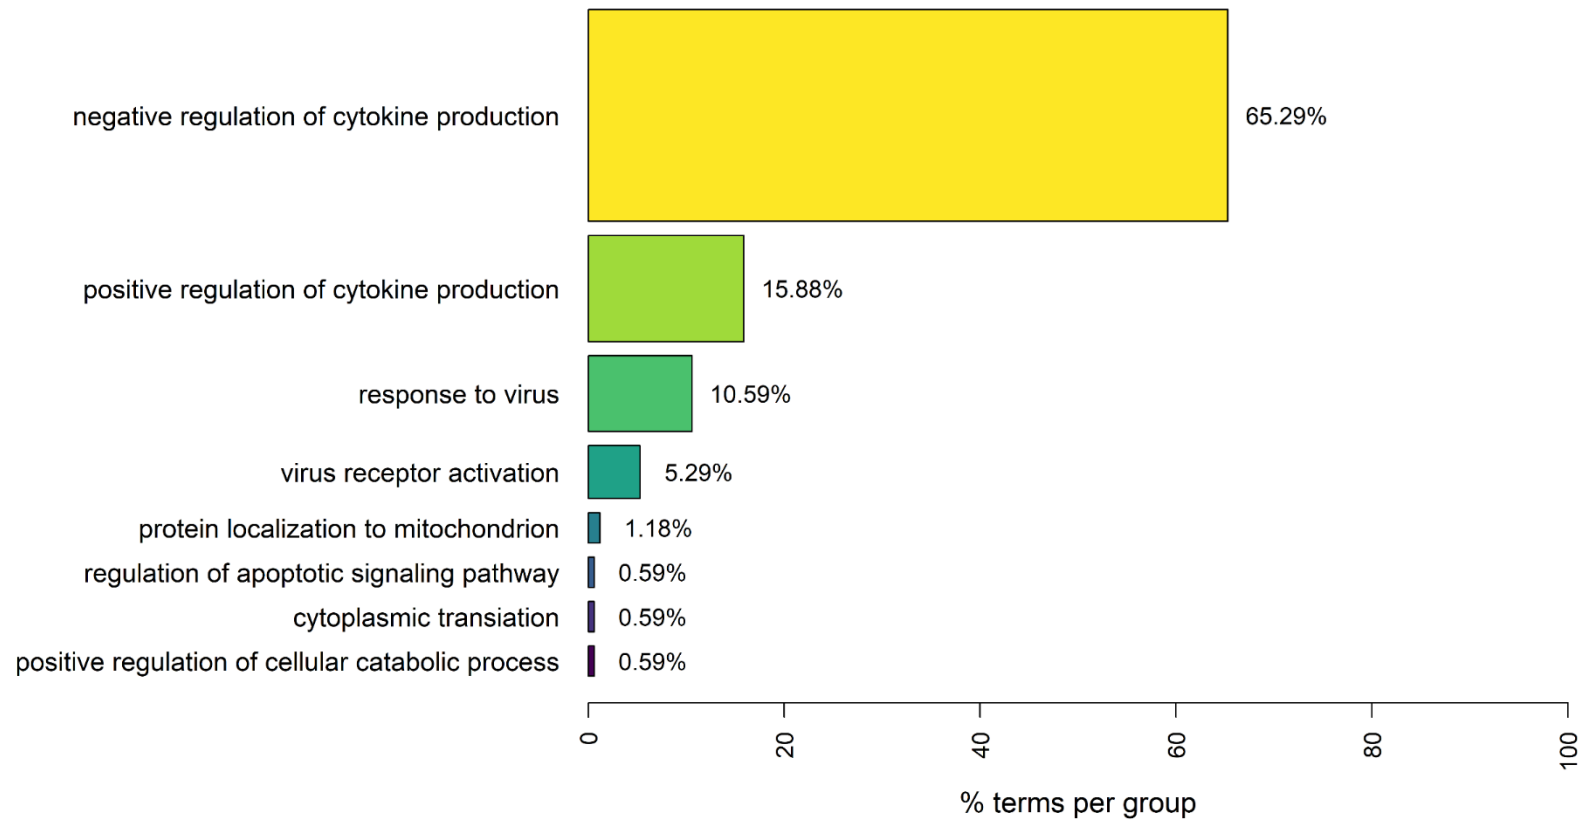

**Supplementary Figure S9:** Functional enrichment analysis results of the overlapping GO biological processes between Guillain-Barre Syndrome and COVID-19, indicating the functional groups and the percentage of terms that belong to each group.

## Parkinson's Disease and COVID-19

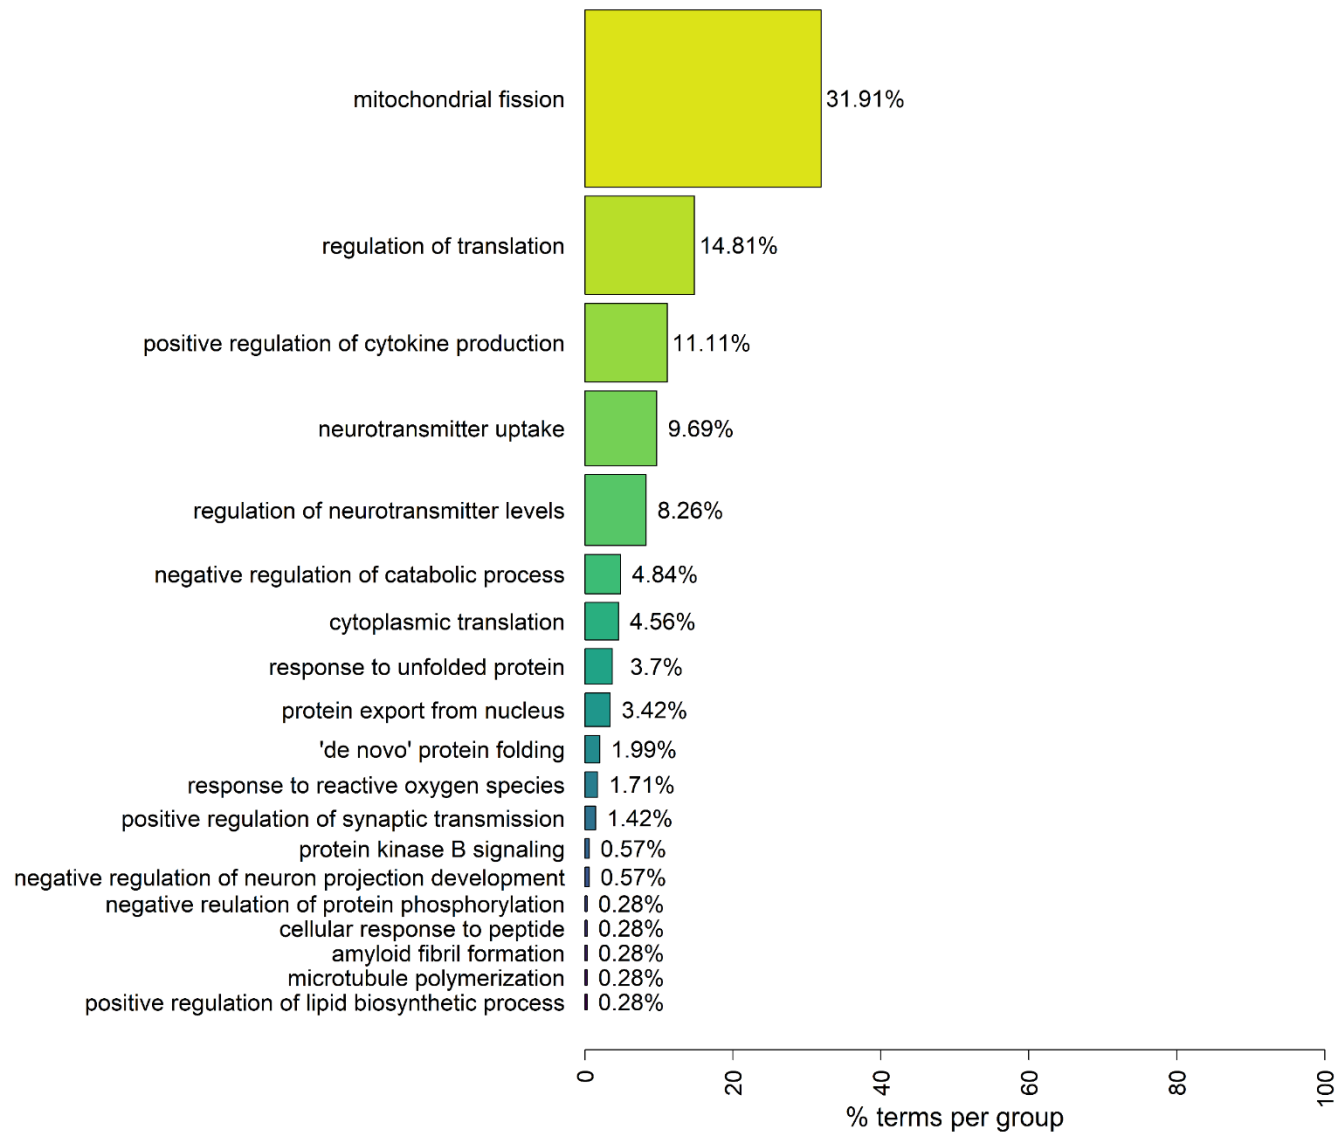

**Supplementary Figure S10:** Functional enrichment analysis results of the overlapping GO biological processes between Parkinson's Disease and COVID-19, indicating the functional groups and the percentage of terms that belong to each group

## Amyotrophic Lateral Sclerosis and COVID-19

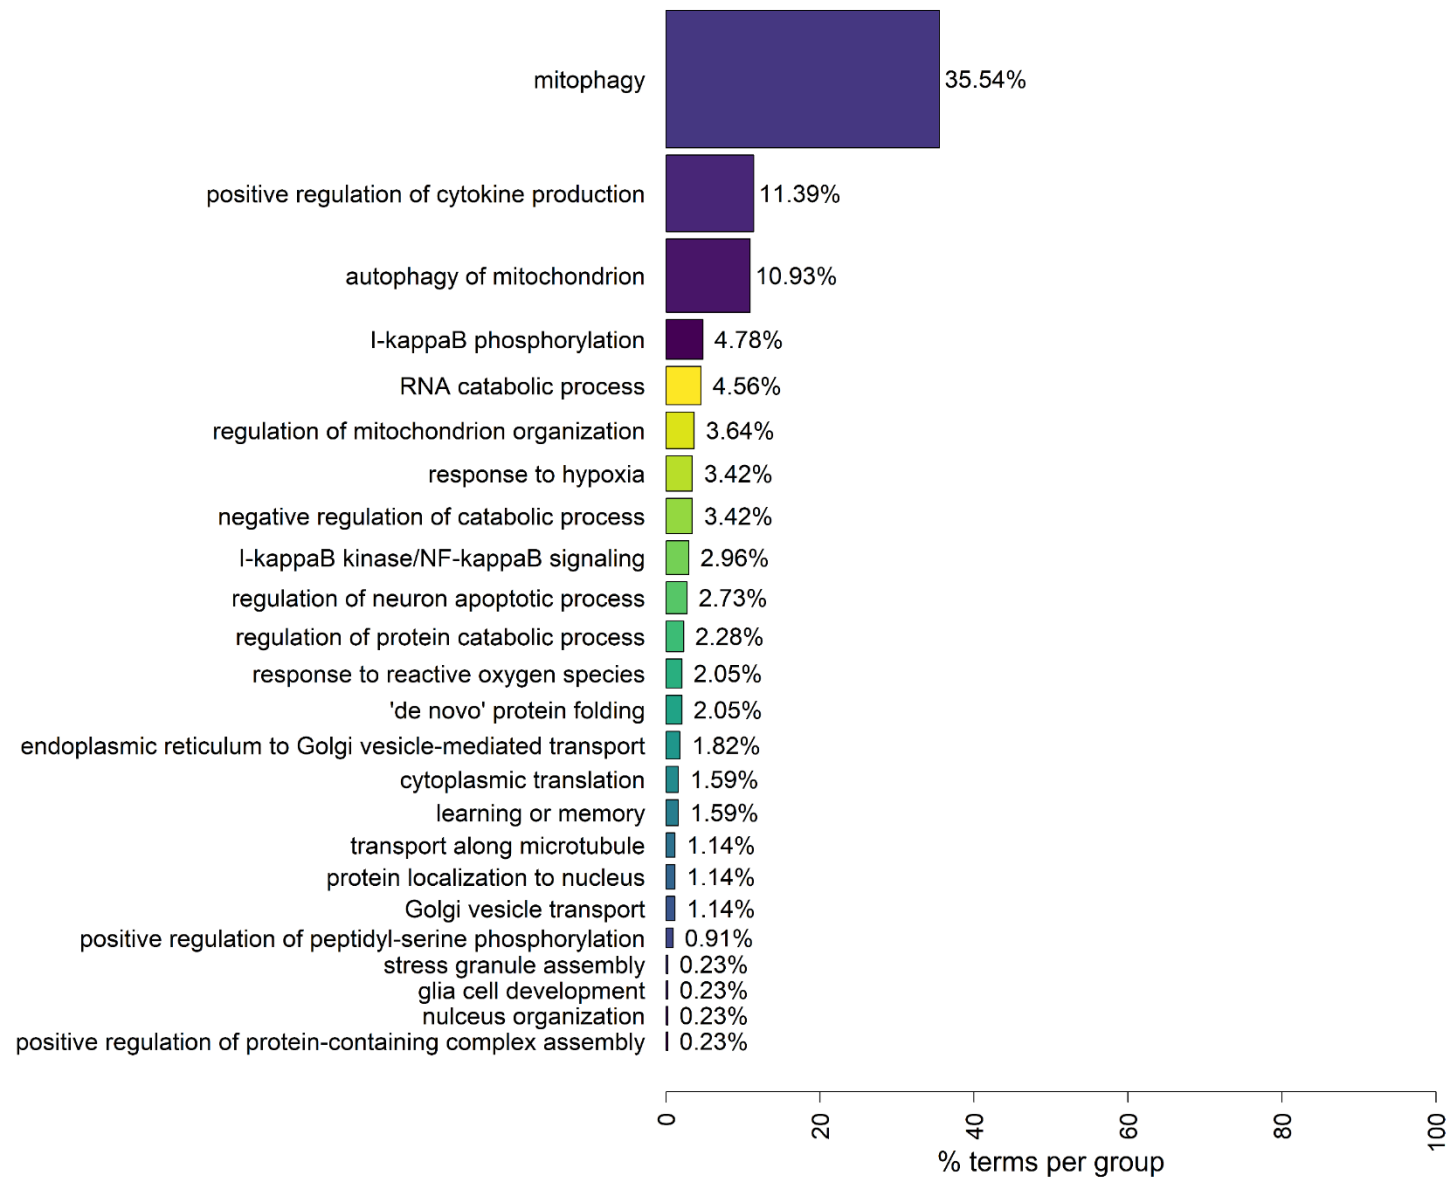

**Supplementary Figure S11:** Functional enrichment analysis results of the overlapping GO biological processes between Amyotrophic Lateral Sclerosis and COVID-19, indicating the functional groups and the percentage of terms that belong to each group

## Huntington's Disease and COVID-19

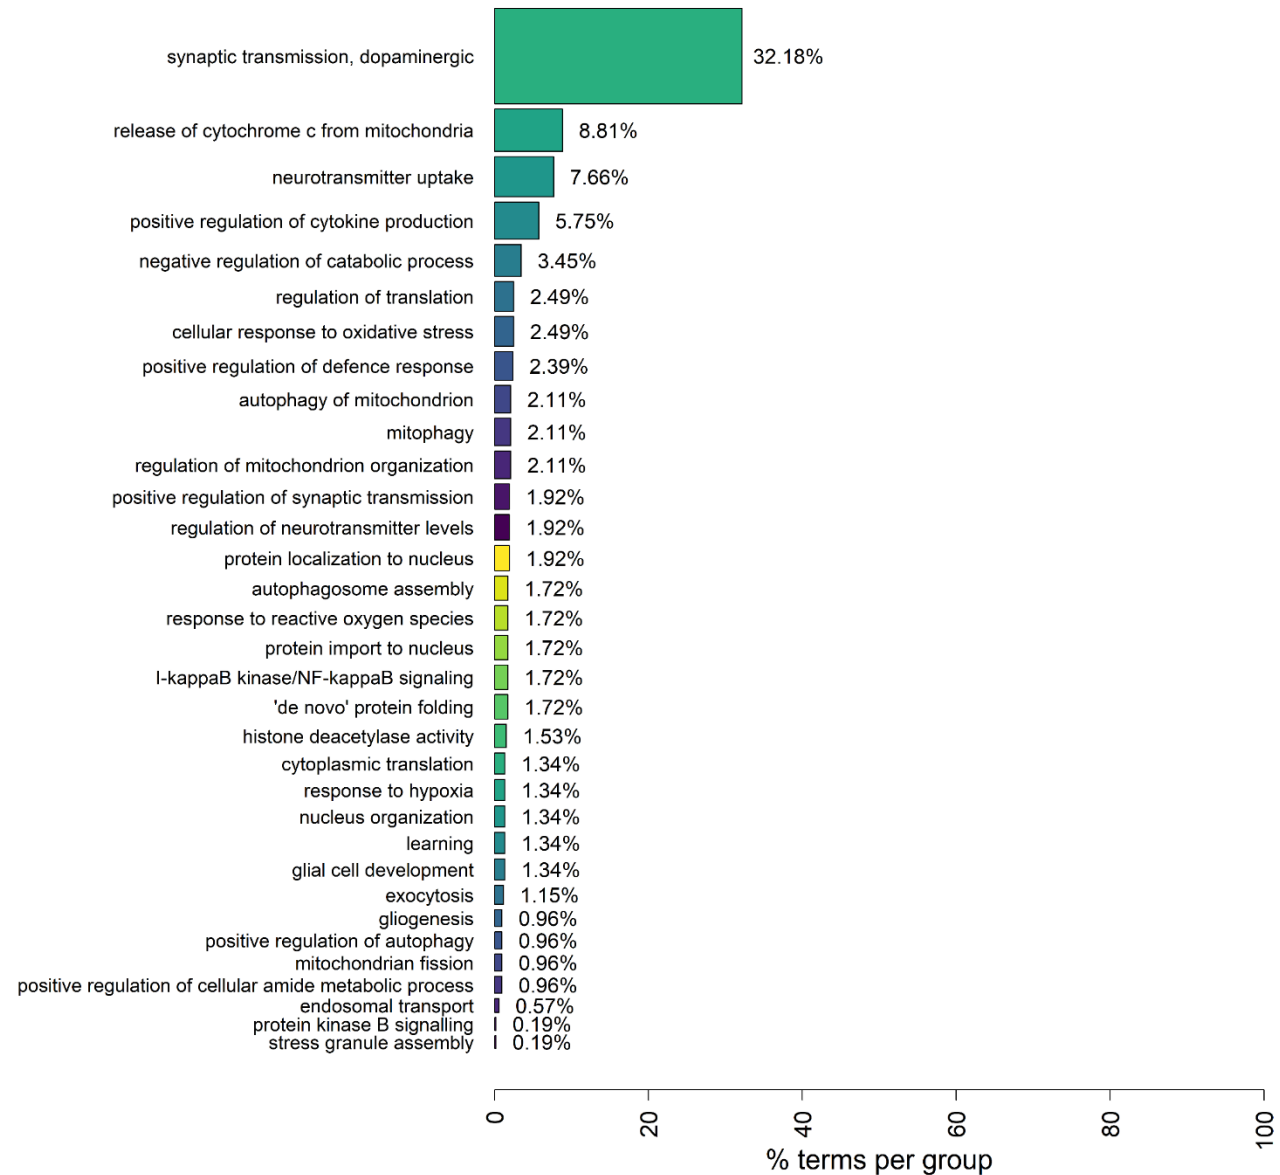

**Supplementary Figure S12:** Functional enrichment analysis results of the overlapping GO biological processes between Huntington's Disease and COVID-19, indicating the functional groups and the percentage of terms that belong to each group

## Alzheimer's Disease and COVID-19

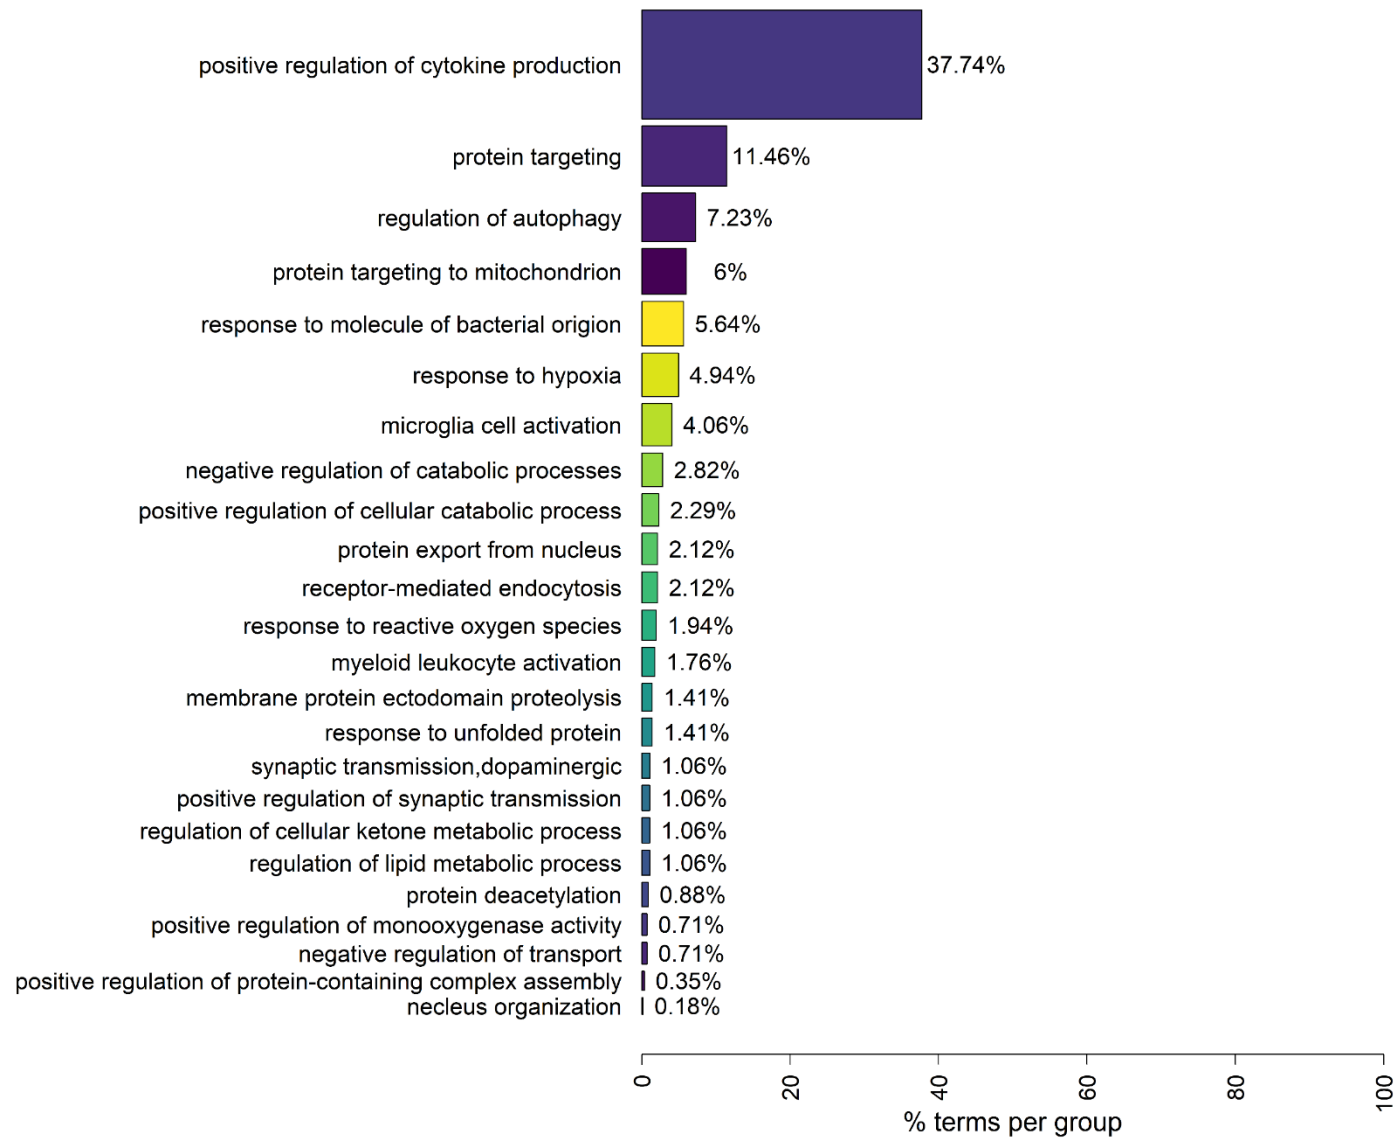

**Supplementary Figure S13:** Functional enrichment analysis results of the overlapping GO biological processes between Alzheimer's Disease and COVID-19, indicating the functional groups and the percentage of terms that belong to each group

**Supplementary Table S1:** Matching 5-mer linear motifs found in the consensus sequences between SARS-CoV-2 epitopes and autoreactive epitopes found in MS, with the 5-mer motif highlighted in their epitope sequences.

| MS epitope ID | COVID-19 epitope ID | Consensus sequence | MS epitope sequence | COVID-19 epitope sequence                             |
|---------------|---------------------|--------------------|---------------------|-------------------------------------------------------|
| P10321        | P0DTC9-16           | ALLLL              | APR <b>ALLLLL</b>   | L <b>ALLLL</b> DRL                                    |
| P10321        | P0DTC9-42           | A??ALLLL           | APR <b>ALLLLL</b>   | GDAAL <b>ALLLL</b> DRLNQL                             |
| P10321        | P0DTC9-93           | A??ALLLL           | APR <b>ALLLLL</b>   | DAAL <b>ALLLL</b> DRLNQL                              |
| P10321        | P0DTC9-118          | A??ALLLL           | APR <b>ALLLLL</b>   | PARMAGNGGDAAL <b>ALLLL</b> DRLNQLESKMSGKGQQQ<br>QQQ   |
| P10321        | P0DTC9-120          | A??ALLLL           | APR <b>ALLLLL</b>   | AAL <b>ALLLL</b> DRLNQLE                              |
| P10321        | P0DTC9-157          | A??ALLLL           | APR <b>ALLLLL</b>   | AGNGGDAAL <b>ALLLL</b> D                              |
| P10321        | P0DTC9-216          | A??ALLLL           | APR <b>ALLLLL</b>   | AAL <b>ALLLL</b> DRLNQLES                             |
| P10321        | P0DTC9-221          | A??ALLLL           | APR <b>ALLLLL</b>   | AGNGGDAAL <b>ALLLL</b> DR                             |
| P10321        | P0DTC9-224          | ALLLL              | APR <b>ALLLLL</b>   | AL <b>ALLLL</b> DRLNQLESK                             |
| P10321        | P0DTC9-225          | ALLLL              | APR <b>ALLLLL</b>   | <b>ALLLL</b> DRLNQLESKMS                              |
| P10321        | P0DTC9-229          | A??ALLLL           | APR <b>ALLLLL</b>   | ARMAGNGGDAAL <b>ALLLL</b> DRLNQLESKMSGKG              |
| P10321        | P0DTC9-231          | A??ALLLL           | APR <b>ALLLLL</b>   | DAAL <b>ALLLL</b> DRLNQLE                             |
| P10321        | P0DTC9-245          | A??ALLLL           | APR <b>ALLLLL</b>   | GGDAAL <b>ALLLL</b> DRLNQ                             |
| P10321        | P0DTC9-249          | A??ALLLL           | APR <b>ALLLLL</b>   | GNGGDAAL <b>ALLLL</b> DRL                             |
| P10321        | P0DTC9-262          | ALLLL              | APR <b>ALLLLL</b>   | L <b>ALLLL</b> DRLNQLESKM                             |
| P10321        | P0DTC9-277          | A??ALLLL           | APR <b>ALLLLL</b>   | MAGNGGDAAL <b>ALLLL</b> D                             |
| P10321        | P0DTC9-282          | A??ALLLL           | APR <b>ALLLLL</b>   | NGGDAAL <b>ALLLL</b> DRLN                             |
| P10321        | P0DTC9-313          | A??ALLLL           | APR <b>ALLLLL</b>   | RMAGNGGDAAL <b>ALLLL</b>                              |
| P10321        | P0DTC9-339          | A??ALLLL           | APR <b>ALLLLL</b>   | SSRGTS ParmAGNGGDAAL <b>ALLLL</b> DRLNQLESKMSGK<br>GQ |
| P10321        | P0DTC9-359          | A??ALLLL           | APR <b>ALLLLL</b>   | AAL <b>ALLLL</b> DRLNQLESKMS                          |
| P10321        | P0DTC9-363          | ALLLL              | APR <b>ALLLLL</b>   | <b>ALLLL</b> DRLNQLESKMSG                             |
| P10321        | P0DTC9-394          | A??ALLLL           | APR <b>ALLLLL</b>   | MAGNGGDAAL <b>ALLLL</b> DR                            |
| P10321        | P0DTC9-417          | A??ALLLL           | APR <b>ALLLLL</b>   | RMAGNGGDAAL <b>ALLLL</b> DRL                          |
| P10321        | P0DTC9-438          | ALLLL              | APR <b>ALLLLL</b>   | AL <b>ALLLL</b> DRLNQLES                              |
| P10321        | P0DTC9-439          | ALLLL              | APR <b>ALLLLL</b>   | <b>ALLLL</b> DRLNQLESKM                               |
| P10321        | P0DTC9-453          | A??ALLLL           | APR <b>ALLLLL</b>   | GGDAAL <b>ALLLL</b> DRLN                              |
| P10321        | P0DTC9-456          | A??ALLLL           | APR <b>ALLLLL</b>   | GNGGDAAL <b>ALLLL</b> DR                              |

|           |             |          |                                                      |                  |
|-----------|-------------|----------|------------------------------------------------------|------------------|
| P10321    | P0DTC9-480  | A??ALLLL | APRALLLL                                             | MAGNGGDAALALLL   |
| J3QL64-2  | P0DTD1-241  | YLATA    | ASQKRPSQRHGSKYLATAST                                 | YLATALLTL        |
| J3QL64-2  | P0DTC1-161  | YLATA    | ASQKRPSQRHGSKYLATAST                                 | ADNNCYLATALLTLQ  |
| J3QL64-2  | P0DTC1-253  | YLATA    | ASQKRPSQRHGSKYLATAST                                 | CYLATALLTLQQIEL  |
| Q53Z42-3  | P0DTD1-602  | APRTL?   | VMAPRTLVL                                            | DPAQLPAPRTLLTK   |
| Q53Z42-3  | P0DTD1-1085 | APRTL?   | VMAPRTLVL                                            | PAPRTLLTKGTLEPE  |
| Q53Z42-3  | P0DTD1-1117 | APRTL?   | VMAPRTLVL                                            | QLPAPRTLLTKGTLE  |
| Q53Z42-3  | P0DTD1-1302 | APRTL?   | VMAPRTLVL                                            | YIGDPAQLPAPRTLL  |
| P09543-2  | P0DTD1-274  | ??GKPVP  | GNGRWMLTLAKNMEVRAIFT<br>GYYGKGKPVPTQG                | DASGKPVVPY       |
| P09543-2  | P0DTC1-256  | ??GKPVP  | GNGRWMLTLAKNMEVRAIFT<br>GYYGKGKPVPTQG                | DASGKPVVPYCYDTNV |
| P09543-2  | P0DTC1-314  | ??GKPVP  | GNGRWMLTLAKNMEVRAIFT<br>GYYGKGKPVPTQG                | ECTIFKDASGKPVVPY |
| P09543-2  | P0DTC1-1010 | ?GKPVP   | GNGRWMLTLAKNMEVRAIFT<br>GYYGKGKPVPTQG                | SGKPVVPYCYDTNVLE |
| P02686-14 | P0DTD1-241  | YLATA    | KYLATASTMDHARHGFLPRH                                 | YLATALLTL        |
| P02686-14 | P0DTC1-161  | YLATA    | KYLATASTMDHARHGFLPRH                                 | ADNNCYLATALLTLQ  |
| P02686-14 | P0DTC1-253  | YLATA    | KYLATASTMDHARHGFLPRH                                 | CYLATALLTLQQIEL  |
| J3QL64-16 | P0DTD1-241  | YLATA    | ASQKRPSQRHGSKYLATASTM                                | YLATALLTL        |
| J3QL64-16 | P0DTC1-161  | YLATA    | ASQKRPSQRHGSKYLATASTM                                | ADNNCYLATALLTLQ  |
| J3QL64-16 | P0DTC1-253  | YLATA    | ASQKRPSQRHGSKYLATASTM                                | CYLATALLTLQQIEL  |
| J3QL64-17 | P0DTD1-241  | YLATA    | ASQKRPSQRHGSKYLATASTM<br>DHARHGFLPRHRDTGILDSIGR<br>F | YLATALLTL        |
| J3QL64-17 | P0DTC1-161  | YLATA    | ASQKRPSQRHGSKYLATASTM<br>DHARHGFLPRHRDTGILDSIGR<br>F | ADNNCYLATALLTLQ  |
| J3QL64-17 | P0DTC1-253  | YLATA    | ASQKRPSQRHGSKYLATASTM<br>DHARHGFLPRHRDTGILDSIGR<br>F | CYLATALLTLQQIEL  |
| P02686-19 | P0DTD1-241  | YLATA    | RHGSKYLATASTMDHARHGFL                                | YLATALLTL        |
| P02686-19 | P0DTC1-161  | YLATA    | RHGSKYLATASTMDHARHGFL                                | ADNNCYLATALLTLQ  |

|              |            |          |                              |                                         |
|--------------|------------|----------|------------------------------|-----------------------------------------|
| P02686-19    | P0DTC1-253 | YLATA    | RHGSKYLATASTMDHARHGFL        | CYLATALLTLQQIEL                         |
| P10809-2     | P0DTC1-566 | IPKEE??P | VVTEIPKEEKDPGM               | IPKEEVKPFITESKP                         |
| Q13875-8     | P0DTC9-1   | ?SRGGS   | QPRSSPLRGPASRGGS PVKAS<br>RF | AEGSRGGSQA                              |
| Q13875-8     | P0DTC9-332 | ?SRGGS   | QPRSSPLRGPASRGGS PVKAS<br>RF | LPQGTTLPKG FYAEGSRGGSQASSRSSRSRNSSRNSTP |
| Q13875-8     | P0DTC9-335 | ?SRGGS   | QPRSSPLRGPASRGGS PVKAS<br>RF | QGTTLPKG FYAEGSRGGS                     |
| Q13875-8     | P0DTC9-448 | ?SRGGS   | QPRSSPLRGPASRGGS PVKAS<br>RF | EGSRGGSQASSRSSS                         |
| Q13875-8     | P0DTC9-501 | SRGGS    | QPRSSPLRGPASRGGS PVKAS<br>RF | SRGGSQASSRSSRS                          |
| A0A075B6H9-1 | P0DTC9-3   | ?PSASA   | QSVLTQS PSASAS               | AP SASAFFGM                             |
| A0A075B6H9-1 | P0DTC9-4   | ?PSASA   | QSVLTQS PSASAS               | AQFAP SASA                              |
| A0A075B6H9-1 | P0DTC9-5   | ?PSASA   | QSVLTQS PSASAS               | AQFAP SASAFFGMSR                        |
| A0A075B6H9-1 | P0DTC9-38  | ?PSASA   | QSVLTQS PSASAS               | FAP SASAFF                              |
| A0A075B6H9-1 | P0DTC9-73  | ?PSASA   | QSVLTQS PSASAS               | WPQIAQFAP SASAFF                        |
| A0A075B6H9-1 | P0DTC9-103 | ?PSASA   | QSVLTQS PSASAS               | QFAP SASAFFGMSRI                        |
| A0A075B6H9-1 | P0DTC9-107 | ?PSASA   | QSVLTQS PSASAS               | AQFAP SASAF                             |
| A0A075B6H9-1 | P0DTC9-178 | ?PSASA   | QSVLTQS PSASAS               | QFAP SASAFF                             |
| A0A075B6H9-1 | P0DTC9-405 | PSASA    | QSVLTQS PSASAS               | PSASAFFGMSRIGMEVTPS                     |
| A0A075B6H9-1 | P0DTC9-440 | ?PSASA   | QSVLTQS PSASAS               | AP SASAFFGMSRIGM                        |
| A0A075B6H9-1 | P0DTC9-461 | ?PSASA   | QSVLTQS PSASAS               | IAQFAP SASAFFGMS                        |
| P02686-35    | P0DTD1-241 | YLATA    | SKYLATASTMDHARHGFLPR         | YLATALLTL                               |
| P02686-35    | P0DTC1-161 | YLATA    | SKYLATASTMDHARHGFLPR         | ADNNCYLATALLTLQ                         |
| P02686-35    | P0DTC1-253 | YLATA    | SKYLATASTMDHARHGFLPR         | CYLATALLTLQQIEL                         |
| P02686-36    | P0DTD1-241 | YLATA    | SQRHGSKYLATASTMDHARH         | YLATALLTL                               |
| P02686-36    | P0DTC1-161 | YLATA    | SQRHGSKYLATASTMDHARH         | ADNNCYLATALLTLQ                         |
| P02686-36    | P0DTC1-253 | YLATA    | SQRHGSKYLATASTMDHARH         | CYLATALLTLQQIEL                         |
| P37837-24    | P0DTD1-920 | ?NYYKK   | YNYYKKFSYKTIVMG              | IGEAVKTQFNYYKKV                         |
| P37837-24    | P0DTC1-94  | NYYKK    | YNYYKKFSYKTIVMG              | LDNYYKKDNSYFTE                          |
| P37837-24    | P0DTC1-536 | NYYKK    | YNYYKKFSYKTIVMG              | IDPKLDNYYKKDNSY                         |
| P37837-24    | P0DTC1-683 | NYYKK    | YNYYKKFSYKTIVMG              | LDNYYKKDNSYFTEQ                         |



|           |             |        |                                              |                 |
|-----------|-------------|--------|----------------------------------------------|-----------------|
| P37837-24 | P0DTC1-886  | NYKK   | YNYKKFSYKTIVMG                               | NYKKDNSYFTEQPI  |
| P37837-24 | P0DTC1-1070 | NYKK   | YNYKKFSYKTIVMG                               | TEIDPKLDNYKKDN  |
| J3QL64-25 | P0DTD1-241  | YLATA  | ASQKRPSQRHGSKYLATASTM<br>DHARHGFLPRHRDTGIL   | YLATALLTL       |
| J3QL64-25 | P0DTC1-161  | YLATA  | ASQKRPSQRHGSKYLATASTM<br>DHARHGFLPRHRDTGIL   | ADNNCYLATALLTLQ |
| J3QL64-25 | P0DTC1-253  | YLATA  | ASQKRPSQRHGSKYLATASTM<br>DHARHGFLPRHRDTGIL   | CYLATALLTLQQIEL |
| P02686-38 | P0DTD1-241  | YLATA  | GSKYLATASTMDHARHGFL                          | YLATALLTL       |
| P02686-38 | P0DTC1-161  | YLATA  | GSKYLATASTMDHARHGFL                          | ADNNCYLATALLTLQ |
| P02686-38 | P0DTC1-253  | YLATA  | GSKYLATASTMDHARHGFL                          | CYLATALLTLQQIEL |
| J3QL64-27 | P0DTD1-241  | YLATA  | GSKYLATASTMDHARHGFLP                         | YLATALLTL       |
| J3QL64-27 | P0DTC1-161  | YLATA  | GSKYLATASTMDHARHGFLP                         | ADNNCYLATALLTLQ |
| J3QL64-27 | P0DTC1-253  | YLATA  | GSKYLATASTMDHARHGFLP                         | CYLATALLTLQQIEL |
| P02686-44 | P0DTD1-241  | YLATA  | KYLATASTM                                    | YLATALLTL       |
| P02686-44 | P0DTC1-161  | YLATA  | KYLATASTM                                    | ADNNCYLATALLTLQ |
| P02686-44 | P0DTC1-253  | YLATA  | KYLATASTM                                    | CYLATALLTLQQIEL |
| P02686-56 | P0DTD1-241  | YLATA  | ASQKRPSQRHGKYLATAST                          | YLATALLTL       |
| P02686-56 | P0DTC1-161  | YLATA  | ASQKRPSQRHGKYLATAST                          | ADNNCYLATALLTLQ |
| P02686-56 | P0DTC1-253  | YLATA  | ASQKRPSQRHGKYLATAST                          | CYLATALLTLQQIEL |
| P60201-47 | P0DTC1-214  | ATLVS  | AAFVGAAATLVSLTTFMIAATY<br>NFAVLKLMGR         | ATLVSDIDITFLKGD |
| P60201-47 | P0DTC1-294  | ?ATLVS | AAFVGAAATLVSLTTFMIAATY<br>NFAVLKLMGR         | DSATLVSDIDITFLK |
| P60201-47 | P0DTC1-508  | ?ATLVS | AAFVGAAATLVSLTTFMIAATY<br>NFAVLKLMGR         | HPDSATLVSDIDITF |
| P60201-47 | P0DTC1-838  | ?ATLVS | AAFVGAAATLVSLTTFMIAATY<br>NFAVLKLMGR         | NGNLHPDSATLVSDI |
| P60201-47 | P0DTC1-857  | ?ATLVS | AAFVGAAATLVSLTTFMIAATY<br>NFAVLKLMGR         | NLHPDSATLVSDIDI |
| J3QL64-91 | P0DTD1-241  | YLATA  | GSKYLATASTMDHARHGFLPR<br>HRDTGILDSIGRFFGGDRG | YLATALLTL       |

|            |             |              |                                                           |                                                       |
|------------|-------------|--------------|-----------------------------------------------------------|-------------------------------------------------------|
| J3QL64-91  | P0DTC1-161  | YLATA        | GSKY <del>LATA</del> STMDHARHGFLPR<br>HRDTGILDSIGRFFGGDRG | ADNNCY <del>LATA</del> ALLTLQ                         |
| J3QL64-91  | P0DTC1-253  | YLATA        | GSKY <del>LATA</del> STMDHARHGFLPR<br>HRDTGILDSIGRFFGGDRG | CY <del>LATA</del> ALLTLQQIEL                         |
| P60201-50  | P0DTC1-790  | FFFLY        | GTAS <del>FFFLY</del> GALLLAYGFYTTGA<br>VRQIFGDYK         | LVQSTQWSL <del>FFFLY</del> E                          |
| P60201-50  | P0DTC1-1247 | FFFLY????L?? | GTAS <del>FFFLY</del> GALLLAYGFYTTGA<br>VRQIFGDYK         | WSL <del>FFFLY</del> ENAFLPF                          |
| P0DTU3-14  | P0DTC2-95   | FLLKY        | YPNRGLQ <del>FLLKY</del> ITGDNLVKGS                       | QPRTF <del>FLLKY</del> NENGTI                         |
| P0DTU3-14  | P0DTC2-215  | FLLKY        | YPNRGLQ <del>FLLKY</del> ITGDNLVKGS                       | AYYVGYLQPRTF <del>FLLKY</del> NENG                    |
| P0DTU3-14  | P0DTC2-282  | FLLKY        | YPNRGLQ <del>FLLKY</del> ITGDNLVKGS                       | T <del>FLLKY</del> NENGTITDAVDCAL                     |
| P0DTU3-14  | P0DTC2-539  | FLLKY        | YPNRGLQ <del>FLLKY</del> ITGDNLVKGS                       | RT <del>FLLKY</del> NENGTITD                          |
| P0DTU3-14  | P0DTC2-577  | FLLKY        | YPNRGLQ <del>FLLKY</del> ITGDNLVKGS                       | YYVGYLQPRTF <del>FLLKY</del>                          |
| P0DTU3-14  | P0DTC2-931  | FLLKY        | YPNRGLQ <del>FLLKY</del> ITGDNLVKGS                       | GAAAYYVGYLQPRTF <del>FLLKY</del> NENGTITDAVDCALDPLSET |
| P0DTU3-14  | P0DTC2-956  | FLLKY        | YPNRGLQ <del>FLLKY</del> ITGDNLVKGS                       | PRT <del>FLLKY</del> NENGTITDA                        |
| P0DTU3-14  | P0DTC2-1020 | FLLKY        | YPNRGLQ <del>FLLKY</del> ITGDNLVKGS                       | <del>FLLKY</del> NENGTITDAV                           |
| P0DTU3-14  | P0DTC2-1267 | FLLKY        | YPNRGLQ <del>FLLKY</del> ITGDNLVKGS                       | VGYLQPRTF <del>FLLKY</del> NE                         |
| A0A0A6YYK6 | P0DTD1-946  | SRQRL        | Y <del>SRQRL</del> QLLLRHISRESI                           | I <del>SRQRL</del> TKYTMADLV                          |
| Q8IUQ4     | P0DTD1-1148 | LPTGT        | ATAL <del>LPTGT</del> SK                                  | RQWL <del>LPTGT</del> LLVDSDL                         |
| Q8IUQ4     | P0DTD1-1286 | LPTGT        | ATAL <del>LPTGT</del> SK                                  | WL <del>LPTGT</del> LLVDSDLND                         |
| Q6UWS5     | P0DTD1-749  | TVAGV??      | A <del>TVAGV</del> HVK                                    | ART <del>TVAGV</del> SICSTMTN                         |
| Q6UWS5     | P0DTD1-941  | TVAGV??      | A <del>TVAGV</del> HVK                                    | ISAKNRART <del>TVAGV</del> SI                         |
| P04271-1   | P0DTC1-1    | ?L?NNELS     | ELIN <del>NNELS</del> HF                                  | AVKLQ <del>NNELS</del> PVALR                          |
| P04271-1   | P0DTC1-100  | ?L?NNELS     | ELIN <del>NNELS</del> HF                                  | LRANS <del>AVKLQ</del> <del>NNELS</del>               |
| P04271-1   | P0DTC1-939  | NNELS        | ELIN <del>NNELS</del> HF                                  | Q <del>NNELS</del> PVALRQMSC                          |
| P04271-1   | P0DTC1-960  | ?L?NNELS     | ELIN <del>NNELS</del> HF                                  | RANS <del>AVKLQ</del> <del>NNELS</del> P              |
| Q9H209     | P0DTC1-2    | ??VATVQ?     | FS <del>VATVQ</del> TTW                                   | CIK <del>VATVQ</del> SKMSDVK                          |
| Q9H209     | P0DTC1-494  | ??VATVQ?     | FS <del>VATVQ</del> TTW                                   | GVGGKPCIK <del>VATVQ</del> S                          |
| P02686-84  | P0DTD1-241  | YLATA        | HGSKY <del>LATA</del> STMDHA                              | <del>YLATA</del> ALLTL                                |
| P02686-84  | P0DTC1-161  | YLATA        | HGSKY <del>LATA</del> STMDHA                              | ADNNCY <del>LATA</del> ALLTLQ                         |
| P02686-84  | P0DTC1-253  | YLATA        | HGSKY <del>LATA</del> STMDHA                              | CY <del>LATA</del> ALLTLQQIEL                         |
| Q01082-1   | P0DTD1-627  | ???SSVEL     | KPRDV <del>SSVEL</del>                                    | GFFKEG <del>SSVEL</del> KHF                           |
| Q01082-1   | P0DTD1-859  | ???SSVEL     | KPRDV <del>SSVEL</del>                                    | FFKEG <del>SSVEL</del> KHFFF                          |

|           |             |                |                             |                                                      |
|-----------|-------------|----------------|-----------------------------|------------------------------------------------------|
| O95674    | P0DTC2-188  | LNRAL???       | PEV <b>LNRAL</b> SNL        | TQ <b>LNRALT</b> GI                                  |
| O95674    | P0DTC2-298  | LNRAL???       | PEV <b>LNRAL</b> SNL        | YGSFCTQ <b>LNRALT</b> GIAVEQD                        |
| O95674    | P0DTC2-406  | LNRAL???       | PEV <b>LNRAL</b> SNL        | TQ <b>LNRALT</b> GIAVEQD                             |
| O95674    | P0DTC2-434  | LNRAL???       | PEV <b>LNRAL</b> SNL        | CTQ <b>LNRALT</b> GIAVEQDKNTQEVFAQVKQI               |
| O95674    | P0DTC2-506  | LNRAL          | PEV <b>LNRAL</b> SNL        | LLQYGSFCTQ <b>LNRAL</b>                              |
| O95674    | P0DTC2-903  | LNRAL???       | PEV <b>LNRAL</b> SNL        | TQ <b>LNRALT</b> GIAVEQDK                            |
| O95674    | P0DTC2-941  | LNRAL???       | PEV <b>LNRAL</b> SNL        | TQ <b>LNRALT</b> GIAVEQDKNTQEVFAQVKQIYKTPPIKDFG<br>G |
| O95674    | P0DTC2-1141 | LNRAL???       | PEV <b>LNRAL</b> SNL        | TQ <b>LNRALT</b> GIAVEQDKNTQ                         |
| O95674    | P0DTC2-1142 | LNRAL???       | PEV <b>LNRAL</b> SNL        | TQ <b>LNRALT</b> GIAVEQDKNTQEVFA                     |
| O95674    | P0DTC2-1190 | LNRAL???       | PEV <b>LNRAL</b> SNL        | FCTQ <b>LNRALT</b> GIAVE                             |
| O95674    | P0DTC2-1221 | LNRAL???       | PEV <b>LNRAL</b> SNL        | <b>LNRALT</b> GIAVEQDKN                              |
| P02686-87 | P0DTD1-241  | YLATA          | RHGSK <b>YLATA</b>          | <b>YLATA</b> LLTL                                    |
| P02686-87 | P0DTC1-161  | YLATA          | RHGSK <b>YLATA</b>          | ADNN <b>CYLATA</b> LLTLQ                             |
| P02686-87 | P0DTC1-253  | YLATA          | RHGSK <b>YLATA</b>          | <b>CYLATA</b> LLTLQQIEL                              |
| P02686-88 | P0DTD1-241  | YLATA          | RHGSK <b>YLATA</b> STMDHARH | <b>YLATA</b> LLTL                                    |
| P02686-88 | P0DTC1-161  | YLATA          | RHGSK <b>YLATA</b> STMDHARH | ADNN <b>CYLATA</b> LLTLQ                             |
| P02686-88 | P0DTC1-253  | YLATA          | RHGSK <b>YLATA</b> STMDHARH | <b>CYLATA</b> LLTLQQIEL                              |
| Q16663    | P0DTD1-795  | SVAAL?         | <b>SVAAL</b> SCLMLVA        | DKRTTCF <b>SVAAL</b> TNN                             |
| Q16663    | P0DTD1-1012 | SVAAL?         | <b>SVAAL</b> SCLMLVA        | LLDKRTTCF <b>SVAAL</b> T                             |
| Q16663    | P0DTD1-1150 | SVAAL?         | <b>SVAAL</b> SCLMLVA        | RTTCF <b>SVAAL</b> TNNVA                             |
| Q16663    | P0DTD1-1189 | SVAAL?         | <b>SVAAL</b> SCLMLVA        | TCF <b>SVAAL</b> TNNVAFQ                             |
| P14174-1  | P0DTD1-633  | VPRAS          | TNV <b>VPRAS</b> VPDGFSEL   | HNKCAYW <b>VPRAS</b>                                 |
| P42701    | P0DTC1-176  | STVLS          | W <b>STVLS</b> TYHF         | AGNATEVPAN <b>STVLS</b>                              |
| P01042-1  | P0DTC1-102  | AVDAA          | KDLFK <b>AVDAA</b> LKK      | LSFCAF <b>AVDAA</b> KAY                              |
| Q13571-1  | P0DTC1-497  | L???SKTPE      | LPSYEEALSLP <b>SKTPE</b>    | GYLTSS <b>SKTPE</b> EHFI                             |
| Q13571-1  | P0DTC1-784  | L???SKTPE      | LPSYEEALSLP <b>SKTPE</b>    | LTSS <b>SKTPE</b> EHFIET                             |
| Q13571-1  | P0DTC1-1020 | SKTPE          | LPSYEEALSLP <b>SKTPE</b>    | <b>SKTPE</b> EHFIETISLA                              |
| Q13571-1  | P0DTC1-1033 | SKTPE          | LPSYEEALSLP <b>SKTPE</b>    | SS <b>SKTPE</b> EHFIETIS                             |
| Q13571-1  | P0DTC1-1057 | ?Y???L???SKTPE | LPSYEEALSLP <b>SKTPE</b>    | TAYNGYLTSS <b>SKTPE</b>                              |
| Q13571-1  | P0DTC1-1282 | Y???L???SKTPE  | LPSYEEALSLP <b>SKTPE</b>    | YNGYLTSS <b>SKTPE</b> EEH                            |
| Q13571-2  | P0DTC1-497  | L???SKTPE      | VVLPSYEEALSLP <b>SKTPE</b>  | GYLTSS <b>SKTPE</b> EHFI                             |
| Q13571-2  | P0DTC1-784  | L???SKTPE      | VVLPSYEEALSLP <b>SKTPE</b>  | LTSS <b>SKTPE</b> EHFIET                             |

|          |             |                |                                          |                                      |
|----------|-------------|----------------|------------------------------------------|--------------------------------------|
| Q13571-2 | P0DTC1-1020 | SKTPE          | VVLPSYEEALSLP <b>SKTPE</b>               | <b>SKTPE</b> EHFIETISLA              |
| Q13571-2 | P0DTC1-1033 | SKTPE          | VVLPSYEEALSLP <b>SKTPE</b>               | SS <b>SKTPE</b> EHFIETIS             |
| Q13571-2 | P0DTC1-1057 | ?Y???L???SKTPE | VVLPSYEEALSLP <b>SKTPE</b>               | TAYNGYLTSS <b>SKTPE</b>              |
| Q13571-2 | P0DTC1-1282 | Y???L???SKTPE  | VVLPSYEEALSLP <b>SKTPE</b>               | YNGYLTSS <b>SKTPE</b> EEH            |
| H7C2W9-1 | P0DTC2-137  | VTYVP          | <b>VTYVP</b> VTTFKNLQTVNVDEN             | H <b>VTYVP</b> PAQEKNF               |
| H7C2W9-1 | P0DTC2-212  | VTYVP          | <b>VTYVP</b> VTTFKNLQTVNVDEN             | APHGVVFLH <b>VTYVP</b> PAQEKNF       |
| H7C2W9-1 | P0DTC2-306  | VTYVP          | <b>VTYVP</b> VTTFKNLQTVNVDEN             | APHGVVFLH <b>VTYVP</b> PA            |
| H7C2W9-1 | P0DTC2-422  | VTYVP          | <b>VTYVP</b> VTTFKNLQTVNVDEN             | <b>VTYVP</b> PAQEK                   |
| H7C2W9-1 | P0DTC2-565  | VTYVP          | <b>VTYVP</b> VTTFKNLQTVNVDEN             | <b>VTYVP</b> PAQEKNF <sup>TTAP</sup> |
| H7C2W9-1 | P0DTC2-615  | VTYVP          | <b>VTYVP</b> VTTFKNLQTVNVDEN             | H <b>VTYVP</b> PAQEK                 |
| H7C2W9-3 | P0DTC2-137  | VTYVP          | <b>VTYVP</b> VTTFK                       | H <b>VTYVP</b> PAQEKNF               |
| H7C2W9-3 | P0DTC2-212  | VTYVP          | <b>VTYVP</b> VTTFK                       | APHGVVFLH <b>VTYVP</b> PAQEKNF       |
| H7C2W9-3 | P0DTC2-306  | VTYVP          | <b>VTYVP</b> VTTFK                       | APHGVVFLH <b>VTYVP</b> PA            |
| H7C2W9-3 | P0DTC2-422  | VTYVP          | <b>VTYVP</b> VTTFK                       | <b>VTYVP</b> PAQEK                   |
| H7C2W9-3 | P0DTC2-565  | VTYVP          | <b>VTYVP</b> VTTFK                       | <b>VTYVP</b> PAQEKNF <sup>TTAP</sup> |
| H7C2W9-3 | P0DTC2-615  | VTYVP          | <b>VTYVP</b> VTTFK                       | H <b>VTYVP</b> PAQEK                 |
| P11586-1 | P0DTD1-377  | QVNGL          | IDLDPETE <b>QVNGLF</b>                   | NHTKKWKYP <b>QVNGLT</b>              |
| P11586-1 | P0DTD1-461  | QVNGL          | IDLDPETE <b>QVNGLF</b>                   | YP <b>QVNGLT</b> SI                  |
| P11586-1 | P0DTD1-543  | QVNGL          | IDLDPETE <b>QVNGLF</b>                   | KYP <b>QVNGLT</b> SIKWAD             |
| P11586-1 | P0DTC1-142  | QVNGL          | IDLDPETE <b>QVNGLF</b>                   | YP <b>QVNGLT</b> SIKWAD              |
| P11586-1 | P0DTC1-633  | QVNGL          | IDLDPETE <b>QVNGLF</b>                   | KKWKYP <b>QVNGLT</b> SIK             |
| P11586-1 | P0DTC1-749  | QVNGL          | IDLDPETE <b>QVNGLF</b>                   | LNHTKKWKYP <b>QVNGL</b>              |
| P11586-1 | P0DTC1-953  | QVNGL          | IDLDPETE <b>QVNGLF</b>                   | <b>QVNGLT</b> SIKWADNNC              |
| P11586-1 | P0DTC1-1245 | QVNGL          | IDLDPETE <b>QVNGLF</b>                   | WKYP <b>QVNGLT</b> SIKWA             |
| P14174-2 | P0DTD1-633  | VPRAS          | IVNTN <b>VPRAS</b> VPDGF <sup>LSEL</sup> | HNKCAYW <b>VPRAS</b>                 |
| P62861-1 | P0DTC1-202  | ARAGK          | KVHGSL <b>ARAGK</b> VRGQTPK              | <b>ARAGK</b> ASCTLSEQLD              |
| P62736-3 | P0DTC1-501  | EKSYE          | <b>SLEKSYE</b> LPDGQVI                   | HEIAWYTER <b>EKSYE</b>               |
| P37108-1 | P0DTC5-36   | LLESE          | <b>VLLESE</b> QFLTELTRL                  | <b>LLESEL</b> VIGAVILRGHLR           |
| P37108-1 | P0DTC5-64   | LLESE          | <b>VLLESE</b> QFLTELTRL                  | HGTILTRP <b>LLESELV</b>              |
| P37108-1 | P0DTC5-72   | LLESE          | <b>VLLESE</b> QFLTELTRL                  | <b>LLESEL</b> VIGAVILRG              |
| P37108-1 | P0DTC5-76   | LLESE          | <b>VLLESE</b> QFLTELTRL                  | LTRP <b>LLESEL</b> VIGAV             |
| P37108-1 | P0DTC5-97   | LLESE          | <b>VLLESE</b> QFLTELTRL                  | GTILTRP <b>LLESELV</b> I             |
| P37108-1 | P0DTC5-117  | LLESE          | <b>VLLESE</b> QFLTELTRL                  | RP <b>LLESEL</b>                     |

|          |             |       |                           |                                         |
|----------|-------------|-------|---------------------------|-----------------------------------------|
| P37108-1 | P0DTC5-118  | LLESE | VLL <b>EE</b> SEQFLTELTRL | RP <b>LLE</b> SELVIGAVIL                |
| P37108-1 | P0DTC5-214  | LLESE | VLL <b>EE</b> SEQFLTELTRL | PLHGTILTRP <b>LLE</b> SE                |
| P37108-1 | P0DTC5-216  | LLESE | VLL <b>EE</b> SEQFLTELTRL | TILTRP <b>LLE</b> SELVIG                |
| P14921   | P0DTD1-298  | FITES | EPS <b>FITE</b> SY        | EVKP <b>FITE</b> SK                     |
| P14921   | P0DTC1-165  | FITES | EPS <b>FITE</b> SY        | AEIPKEEVKP <b>FITE</b> S                |
| P14921   | P0DTC1-388  | FITES | EPS <b>FITE</b> SY        | EVKP <b>FITE</b> SKPSVEQ                |
| P14921   | P0DTC1-421  | FITES | EPS <b>FITE</b> SY        | <b>FITE</b> SKPSVEQRKQD                 |
| P14921   | P0DTC1-566  | FITES | EPS <b>FITE</b> SY        | IPKEEVKP <b>FITE</b> SKP                |
| P14921   | P0DTC1-614  | FITES | EPS <b>FITE</b> SY        | KEEVKP <b>FITE</b> SKPSV                |
| P14921   | P0DTC1-643  | FITES | EPS <b>FITE</b> SY        | KP <b>FITE</b> SKPSVEQRK                |
| P04150   | P0DTD1-17   | EVVEN | <b>EV</b> VENLLNY         | <b>EE</b> VVENPTI                       |
| P04150   | P0DTC1-120  | EVVEN | <b>EV</b> VENLLNY         | SE <b>EV</b> VENPTIQKDVLECN             |
| P04150   | P0DTC1-152  | EVVEN | <b>EV</b> VENLLNY         | ACEDLKPVSE <b>EV</b> VEN                |
| P04150   | P0DTC1-318  | EVVEN | <b>EV</b> VENLLNY         | EDLKPVSE <b>EV</b> VENPT                |
| P04150   | P0DTC1-396  | EVVEN | <b>EV</b> VENLLNY         | <b>EV</b> VENPTIQKDVLEC                 |
| P04150   | P0DTC1-716  | EVVEN | <b>EV</b> VENLLNY         | LKPVSE <b>EV</b> VENPTIQ                |
| P04150   | P0DTC1-919  | EVVEN | <b>EV</b> VENLLNY         | PVSE <b>EV</b> VENPTIQKD                |
| P04150   | P0DTC1-997  | EVVEN | <b>EV</b> VENLLNY         | SE <b>EV</b> VENPTIQKDV                 |
| Q06323-1 | P0DTD1-625  | DIILK | LY <b>DI</b> ILKNF        | G <b>DI</b> ILKPANNSL                   |
| Q06323-1 | P0DTC1-275  | DIILK | LY <b>DI</b> ILKNF        | <b>DI</b> ILKPANNSLKITE                 |
| Q06323-1 | P0DTC1-397  | DIILK | LY <b>DI</b> ILKNF        | EVVG <b>DI</b> ILKPANNSL                |
| Q06323-1 | P0DTC1-1128 | DIILK | LY <b>DI</b> ILKNF        | TTEVV <b>GDI</b> ILKPANN                |
| Q06323-1 | P0DTC1-1196 | DIILK | LY <b>DI</b> ILKNF        | VKTTEVV <b>GDI</b> ILKPA                |
| H7C2W9-4 | P0DTC2-137  | VTYVP | TLV <b>VTY</b> VPVTTFK    | H <b>VTY</b> VP <b>PA</b> QEKNF         |
| H7C2W9-4 | P0DTC2-212  | VTYVP | TLV <b>VTY</b> VPVTTFK    | APHGVVFLH <b>VTY</b> VP <b>PA</b> QEKNF |
| H7C2W9-4 | P0DTC2-306  | VTYVP | TLV <b>VTY</b> VPVTTFK    | APHGVVFLH <b>VTY</b> VP <b>PA</b>       |
| H7C2W9-4 | P0DTC2-422  | VTYVP | TLV <b>VTY</b> VPVTTFK    | <b>VTY</b> VP <b>PA</b> QEK             |
| H7C2W9-4 | P0DTC2-565  | VTYVP | TLV <b>VTY</b> VPVTTFK    | <b>VTY</b> VP <b>PA</b> QEKNFTAP        |
| H7C2W9-4 | P0DTC2-615  | VTYVP | TLV <b>VTY</b> VPVTTFK    | H <b>VTY</b> VP <b>PA</b> QEK           |
| P37108-2 | P0DTC5-36   | LLESE | VLL <b>EE</b> SEQFLTEL    | <b>LLE</b> SELVIGAVILRGHLR              |
| P37108-2 | P0DTC5-64   | LLESE | VLL <b>EE</b> SEQFLTEL    | HGTILTRP <b>LLE</b> SELV                |
| P37108-2 | P0DTC5-72   | LLESE | VLL <b>EE</b> SEQFLTEL    | <b>LLE</b> SELVIGAVILRG                 |
| P37108-2 | P0DTC5-76   | LLESE | VLL <b>EE</b> SEQFLTEL    | LTRP <b>LLE</b> SELVIGAV                |

|           |             |          |                                       |                                |
|-----------|-------------|----------|---------------------------------------|--------------------------------|
| P37108-2  | P0DTC5-97   | LLESE    | VLL <b>EE</b> SQFLTEL                 | GTILTRP <b>LLE</b> SELVI       |
| P37108-2  | P0DTC5-117  | LLESE    | VLL <b>EE</b> SQFLTEL                 | RP <b>LLE</b> SEL              |
| P37108-2  | P0DTC5-118  | LLESE    | VLL <b>EE</b> SQFLTEL                 | RP <b>LLE</b> SELVIGAVIL       |
| P37108-2  | P0DTC5-214  | LLESE    | VLL <b>EE</b> SQFLTEL                 | PLHGTILTRP <b>LLE</b> SE       |
| P37108-2  | P0DTC5-216  | LLESE    | VLL <b>EE</b> SQFLTEL                 | TILTRP <b>LLE</b> SELVIG       |
| H7C2W9-5  | P0DTC2-137  | VTYVP    | <b>VTYVP</b> VTTF                     | H <b>VTYVP</b> PAQEKNF         |
| H7C2W9-5  | P0DTC2-212  | VTYVP    | <b>VTYVP</b> VTTF                     | APHGVVFLH <b>VTYVP</b> PAQEKNF |
| H7C2W9-5  | P0DTC2-306  | VTYVP    | <b>VTYVP</b> VTTF                     | APHGVVFLH <b>VTYVP</b> PA      |
| H7C2W9-5  | P0DTC2-422  | VTYVP    | <b>VTYVP</b> VTTF                     | <b>VTYVP</b> PAQEK             |
| H7C2W9-5  | P0DTC2-565  | VTYVP    | <b>VTYVP</b> VTTF                     | <b>VTYVP</b> PAQEKNFTTAP       |
| H7C2W9-5  | P0DTC2-615  | VTYVP    | <b>VTYVP</b> VTTF                     | H <b>VTYVP</b> PAQEK           |
| P05783-9  | P0DTC1-80   | LGSAL    | <b>SLGSAL</b> RP                      | GMNGRTIL <b>GSAL</b> LED       |
| P05783-9  | P0DTC1-560  | LGSAL    | <b>SLGSAL</b> RP                      | I <b>LGSA</b> LEDEFTPFD        |
| P05783-9  | P0DTC1-839  | LGSAL    | <b>SLGSAL</b> RP                      | NGRTIL <b>GSAL</b> LEDEF       |
| P05783-9  | P0DTC1-973  | LGSAL    | <b>SLGSAL</b> RP                      | RTIL <b>GSAL</b> LEDEFTP       |
| P05783-10 | P0DTC1-80   | LGSAL    | <b>SLGSAL</b> RPSTSRSL                | GMNGRTIL <b>GSAL</b> LED       |
| P05783-10 | P0DTC1-560  | LGSAL    | <b>SLGSAL</b> RPSTSRSL                | I <b>LGSA</b> LEDEFTPFD        |
| P05783-10 | P0DTC1-839  | LGSAL    | <b>SLGSAL</b> RPSTSRSL                | NGRTIL <b>GSAL</b> LEDEF       |
| P05783-10 | P0DTC1-973  | LGSAL    | <b>SLGSAL</b> RPSTSRSL                | RTIL <b>GSAL</b> LEDEFTP       |
| P62316    | P0DTD1-132  | EEEEF    | <b>EEEEF</b> NTGP                     | GD <b>CEEEF</b> EPSTQYEY       |
| P62316    | P0DTD1-612  | EEEEF    | <b>EEEEF</b> NTGP                     | <b>EEEEF</b> EPSTQYE           |
| P62316    | P0DTC1-234  | EEEEF    | <b>EEEEF</b> NTGP                     | <b>CEEEF</b> EPSTQYEYG         |
| P62316    | P0DTC1-261  | EEEEF    | <b>EEEEF</b> NTGP                     | DEDEEEGD <b>CEEEF</b> E        |
| P62316    | P0DTC1-262  | EEEEF    | <b>EEEEF</b> NTGP                     | DEEEGD <b>CEEEF</b> EPS        |
| P62316    | P0DTC1-327  | EEEEF    | <b>EEEEF</b> NTGP                     | EEGD <b>CEEEF</b> EPSTQ        |
| P62316    | P0DTC1-453  | EEEEF    | <b>EEEEF</b> NTGP                     | GD <b>CEEEF</b> EPSTQYE        |
| P47914-1  | P0DTD1-890  | TQAPT??S | AQAAAPASVPAQAPKR <b>TQAPT</b><br>KASE | GLHPT <b>TQAPT</b> HLSDVT      |
| P47914-1  | P0DTD1-949  | TQAPT??S | AQAAAPASVPAQAPKR <b>TQAPT</b><br>KASE | ITGLHPT <b>TQAPT</b> HLSV      |
| Q53YP1-1  | P0DTC1-607  | KDYLA    | DG <b>KDYLA</b> LNEDLRW               | KAY <b>KDYLA</b> SGGQPIT       |
| Q53YP1-1  | P0DTC1-1267 | KDYLA    | DG <b>KDYLA</b> LNEDLRW               | Y <b>KDYLA</b> SGGQPITNC       |
| P08575-1  | P0DTC1-1072 | ??KALRK  | VDIFQVV <b>KALRKA</b>                 | TEMLA <b>KALRK</b> VPTDN       |

|          |             |             |                                |                                |
|----------|-------------|-------------|--------------------------------|--------------------------------|
| P08575-2 | P0DTC1-1072 | ???KALRK    | VVDIFQVV <b>KALRK</b> ARPG     | TEMLA <b>KALRK</b> VPTDN       |
| Q9NQ90-1 | P0DTC2-981  | GETGK       | <b>GETG</b> KEPHAGGPGDIELGPL   | VRQIAP <b>GETG</b> KIADY       |
| Q53YP1-2 | P0DTC1-607  | KDYLA       | AYDG <b>KDYLA</b> LNE DLRSWT   | KAY <b>KDYLA</b> SGGQPIT       |
| Q53YP1-2 | P0DTC1-1267 | KDYLA       | AYDG <b>KDYLA</b> LNE DLRSWT   | <b>YKDYL</b> ASGGQPITNC        |
| Q53YP1-3 | P0DTC1-607  | KDYLA       | DG <b>KDYLA</b> LNE DLR        | KAY <b>KDYLA</b> SGGQPIT       |
| Q53YP1-3 | P0DTC1-1267 | KDYLA       | DG <b>KDYLA</b> LNE DLR        | <b>YKDYL</b> ASGGQPITNC        |
| Q53YP1-4 | P0DTC1-607  | KDYLA       | DG <b>KDYLA</b> LNE DLRS       | KAY <b>KDYLA</b> SGGQPIT       |
| Q53YP1-4 | P0DTC1-1267 | KDYLA       | DG <b>KDYLA</b> LNE DLRS       | <b>YKDYL</b> ASGGQPITNC        |
| F1MPL6   | P0DTC1-607  | KDYLA       | DG <b>KDYLA</b> LNE DLRSWT     | KAY <b>KDYLA</b> SGGQPIT       |
| F1MPL6   | P0DTC1-1267 | KDYLA       | DG <b>KDYLA</b> LNE DLRSWT     | <b>YKDYL</b> ASGGQPITNC        |
| Q53YP1-5 | P0DTC1-607  | KDYLA       | DG <b>KDYLA</b> LNE DLRSWTA    | KAY <b>KDYLA</b> SGGQPIT       |
| Q53YP1-5 | P0DTC1-1267 | KDYLA       | DG <b>KDYLA</b> LNE DLRSWTA    | <b>YKDYL</b> ASGGQPITNC        |
| Q53YP1-6 | P0DTC1-607  | KDYLA       | G <b>KDYLA</b> LNE DLR         | KAY <b>KDYLA</b> SGGQPIT       |
| Q53YP1-6 | P0DTC1-1267 | KDYLA       | G <b>KDYLA</b> LNE DLR         | <b>YKDYL</b> ASGGQPITNC        |
| Q53YP1-7 | P0DTC1-607  | KDYLA       | G <b>KDYLA</b> LNE DLRSW       | KAY <b>KDYLA</b> SGGQPIT       |
| Q53YP1-7 | P0DTC1-1267 | KDYLA       | G <b>KDYLA</b> LNE DLRSW       | <b>YKDYL</b> ASGGQPITNC        |
| Q53YP1-8 | P0DTC1-607  | KDYLA       | G <b>KDYLA</b> LNE DLRSWTA     | KAY <b>KDYLA</b> SGGQPIT       |
| Q53YP1-8 | P0DTC1-1267 | KDYLA       | G <b>KDYLA</b> LNE DLRSWTA     | <b>YKDYL</b> ASGGQPITNC        |
| P05109-1 | P0DTC1-832  | LNSII       | MLTELEKA <b>LNSII</b> DV       | NFVFP <b>LNSII</b> KTIQP       |
| P05109-1 | P0DTC1-1179 | LNSII       | MLTELEKA <b>LNSII</b> DV       | VFPL <b>LNSII</b> KTIQPRV      |
| P62937-2 | P0DTD1-970  | TVFFD       | VNPT <b>TVFFD</b> IAVDGEPLGRVS | KPTETICAPL <b>TVFFD</b>        |
| P62937-2 | P0DTD1-1098 | TVFFD??VDG? | VNPT <b>TVFFD</b> IAVDGEPLGRVS | PL <b>TVFFD</b> GRVDGQVD       |
| P62937-2 | P0DTD1-1197 | TVFFD       | VNPT <b>TVFFD</b> IAVDGEPLGRVS | TETICAPL <b>TVFFD</b> GR       |
| P62937-2 | P0DTD1-1202 | TVFFD??VD   | VNPT <b>TVFFD</b> IAVDGEPLGRVS | TICAPL <b>TVFFD</b> GRVD       |
| P62937-2 | P0DTD1-1234 | TVFFD??VDG? | VNPT <b>TVFFD</b> IAVDGEPLGRVS | <b>TVFFD</b> GRVDGQVDLF        |
| Q53YP1-9 | P0DTC1-607  | KDYLA       | YDG <b>KDYLA</b> LNE DLRSWT    | KAY <b>KDYLA</b> SGGQPIT       |
| Q53YP1-9 | P0DTC1-1267 | KDYLA       | YDG <b>KDYLA</b> LNE DLRSWT    | <b>YKDYL</b> ASGGQPITNC        |
| H7C2W9-6 | P0DTC2-137  | VTYVP       | TL <b>VTYVP</b> VTTF           | H <b>VTYVP</b> PAQEKNF         |
| H7C2W9-6 | P0DTC2-212  | VTYVP       | TL <b>VTYVP</b> VTTF           | APHGVVFLH <b>VTYVP</b> PAQEKNF |
| H7C2W9-6 | P0DTC2-306  | VTYVP       | TL <b>VTYVP</b> VTTF           | APHGVVFLH <b>VTYVP</b> A       |
| H7C2W9-6 | P0DTC2-422  | VTYVP       | TL <b>VTYVP</b> VTTF           | <b>VTYVP</b> PAQEK             |
| H7C2W9-6 | P0DTC2-565  | VTYVP       | TL <b>VTYVP</b> VTTF           | <b>VTYVP</b> PAQEKNFTTAP       |
| H7C2W9-6 | P0DTC2-615  | VTYVP       | TL <b>VTYVP</b> VTTF           | H <b>VTYVP</b> PAQEK           |

|              |             |          |                  |                  |
|--------------|-------------|----------|------------------|------------------|
| P06733-3     | P0DTD1-638  | ADLYK    | ADLYKSFIDYPVVS   | ITEHSWNADLYKLM   |
| P06733-3     | P0DTD1-909  | ADLYK    | ADLYKSFIDYPVVS   | HSWNADLYKLMGHFA  |
| P06733-3     | P0DTD1-1287 | ADLYK    | ADLYKSFIDYPVVS   | WNADLYKLMGHFAWW  |
| P29401-5     | P0DTC1-505  | YFDKA    | CGMAYTGKYFDKASY  | HLYFDKAGQKTYERH  |
| P29401-5     | P0DTC1-1015 | YFDKA    | CGMAYTGKYFDKASY  | SIHLYFDKAGQKTYE  |
| P29401-5     | P0DTC1-1195 | YFDKA    | CGMAYTGKYFDKASY  | VKNGSIHLYFDKAGQ  |
| P29401-5     | P0DTC1-1232 | YFDKA    | CGMAYTGKYFDKASY  | VTVKNGSIHLYFDKA  |
| P29401-5     | P0DTC1-1260 | YFDKA    | CGMAYTGKYFDKASY  | YFDKAGQKTYERHSL  |
| Q05329-2     | P0DTD1-37   | Q??LKYAI | CQTTLKYYAIKTGHPR | IPITITQMNLYKAISA |
| Q05329-2     | P0DTD1-548  | QTTLK    | CQTTLKYYAIKTGHPR | NVCKTCGQQQTTLK   |
| Q05329-2     | P0DTD1-1056 | ?LKYAI   | CQTTLKYYAIKTGHPR | MNLYKAISAKNRART  |
| Q05329-2     | P0DTD1-1204 | Q??LKYAI | CQTTLKYYAIKTGHPR | TITQMNLYKAISAKN  |
| Q05329-2     | P0DTD1-1220 | Q??LKYAI | CQTTLKYYAIKTGHPR | TQMNLYKAISAKNRA  |
| Q05329-2     | P0DTC1-238  | QTTLK    | CQTTLKYYAIKTGHPR | CKTCGQQQTTLKGVE  |
| Q05329-2     | P0DTC1-482  | QTTLK    | CQTTLKYYAIKTGHPR | GQQQTTLKGVEAVMY  |
| Q05329-2     | P0DTC1-1060 | QTTLK    | CQTTLKYYAIKTGHPR | TCGQQQTTLKGVEAV  |
| Q05329-2     | P0DTC1-1235 | QTTLK    | CQTTLKYYAIKTGHPR | VVCKTCGQQQTTLKG  |
| P02489       | P0DTD1-776  | DDFVE    | DDFVEIHGKHNERQD  | CVCSVIDLLDDFVE   |
| A0A0D9SGF6-3 | P0DTC1-149  | RQGFV    | DWWKVEVNDRQGFVP  | AARQGFVDSDEVTKD  |
| A0A0D9SGF6-3 | P0DTC1-576  | RQGFV    | DWWKVEVNDRQGFVP  | ISAAARQGFVDSDEV  |
| A0A0D9SGF6-3 | P0DTC1-772  | RQGFV    | DWWKVEVNDRQGFVP  | LSTFISAAARQGFVDS |
| A0A0D9SGF6-3 | P0DTC1-970  | RQGFV    | DWWKVEVNDRQGFVP  | RQGFVDSDEVTKDVV  |
| A0A0D9SGF6-3 | P0DTC1-1082 | RQGFV    | DWWKVEVNDRQGFVP  | TFISAAARQGFVDSDV |
| P09972-3     | P0DTD1-338  | EASFN    | EASFNLNAINRCPLP  | KFCLEASFNY       |
| P09972-3     | P0DTD1-476  | EASFN    | EASFNLNAINRCPLP  | CLEASFNYL        |
| P09972-3     | P0DTC1-95   | EASFN    | EASFNLNAINRCPLP  | LEASFNYLKSPNFS   |
| P09972-3     | P0DTC1-310  | EASFN    | EASFNLNAINRCPLP  | EASFNYLKSPNFSKL  |
| A0A1W2PRT3-1 | P0DTD1-568  | DGEVI    | EMRDGEVIKESKQEH  | LDGEVITFDNLKLLS  |
| A0A1W2PRT3-1 | P0DTC1-417  | DGEVI    | EMRDGEVIKESKQEH  | FHLDGEVITFDNLKT  |
| A0A1W2PRT3-1 | P0DTC1-678  | DGEVI    | EMRDGEVIKESKQEH  | LDGEVITFDNLKLL   |
| A0A1W2PRT3-1 | P0DTC1-868  | DGEVI    | EMRDGEVIKESKQEH  | NPTTFHLDGEVITFD  |
| A0A1W2PRT3-1 | P0DTC1-1125 | DGEVI    | EMRDGEVIKESKQEH  | TSNPTTFHLDGEVIT  |
| A0A1W2PRT3-1 | P0DTC1-1129 | DGEVI    | EMRDGEVIKESKQEH  | TTFHLDGEVITFDNL  |



|              |             |           |                 |                  |
|--------------|-------------|-----------|-----------------|------------------|
| P08238-5     | P0DTD1-789  | ?LFENK    | FIPRRAPFDLFENKK | DGVDVELFENKTTLTP |
| P08238-5     | P0DTD1-992  | LFENK     | FIPRRAPFDLFENKK | LFENKTTLTPVNVAFE |
| P08238-5     | P0DTD1-1246 | ?LFENK    | FIPRRAPFDLFENKK | VDVELFENKTTLTPVN |
| P08238-5     | P0DTD1-1312 | ?LFENK    | FIPRRAPFDLFENKK | YTKVDGVDVELFENK  |
| P29401-7     | P0DTD1-255  | AEAEL     | FLAEAELNLNRKISS | AEAELAKNV        |
| P29401-7     | P0DTC1-129  | AEAEL     | FLAEAELNLNRKISS | TLVATAEAELAKNVSL |
| P29401-7     | P0DTC1-212  | AEAEL     | FLAEAELNLNRKISS | ATAEAELAKNVSLDN  |
| P29401-7     | P0DTC1-787  | AEAEL     | FLAEAELNLNRKISS | LVATAEAELAKNVSL  |
| P29401-7     | P0DTC1-802  | AEAEL     | FLAEAELNLNRKISS | MEKLKTLVATAEAEL  |
| P08779-10    | P0DTC1-174  | AGALN     | FSLAGALNAGFKETR | AGALNKATNNAMQVE  |
| P08779-10    | P0DTC1-464  | ??AGALN   | FSLAGALNAGFKETR | GGGVAGALNKATNNA  |
| P08779-10    | P0DTC1-492  | ??AGALN   | FSLAGALNAGFKETR | GVAGALNKATNNAMQ  |
| P08779-10    | P0DTC1-626  | ??AGALN   | FSLAGALNAGFKETR | KHGGGVAGALNKATN  |
| P08238-9     | P0DTC1-31   | ????SAFVE | GESKEQVANSAFVER | ILASFSASTSAFVET  |
| P08238-9     | P0DTC1-208  | ????SAFVE | GESKEQVANSAFVER | ASFSASTSAFVETVK  |
| P08238-9     | P0DTC1-211  | ????SAFVE | GESKEQVANSAFVER | ASTSAFVETVKGLDY  |
| P02511-7     | P0DTD1-940  | IRRP      | HPWIRRPFPFHSPS  | IRRPFLCCKCCYDHV  |
| P02511-7     | P0DTD1-1174 | IRRP      | HPWIRRPFPFHSPS  | SQTSLRGACIRRP    |
| P02511-7     | P0DTD1-1229 | IRRP      | HPWIRRPFPFHSPS  | TSLRGACIRRPFLC   |
| A0A1W2PRT3-2 | P0DTD1-568  | DGEVI     | IVVKTVMRDGEVIK  | LDGEVITFDNLKTL   |
| A0A1W2PRT3-2 | P0DTC1-417  | DGEVI     | IVVKTVMRDGEVIK  | FHLDGEVITFDNLKT  |
| A0A1W2PRT3-2 | P0DTC1-678  | DGEVI     | IVVKTVMRDGEVIK  | LDGEVITFDNLKTL   |
| A0A1W2PRT3-2 | P0DTC1-868  | DGEVI     | IVVKTVMRDGEVIK  | NPTTFHLDGEVITFD  |
| A0A1W2PRT3-2 | P0DTC1-1125 | DGEVI     | IVVKTVMRDGEVIK  | TSNPTTFHLDGEVIT  |
| A0A1W2PRT3-2 | P0DTC1-1129 | DGEVI     | IVVKTVMRDGEVIK  | TTFHLDGEVITFDNL  |
| Q13813-16    | P0DTC1-505  | ??KAGQK   | LEKAGQKLIDVNHYA | HLYFDKAGQKTYERH  |
| Q13813-16    | P0DTC1-1015 | ??KAGQK   | LEKAGQKLIDVNHYA | SIHLYFDKAGQKTYE  |
| Q13813-16    | P0DTC1-1260 | ??KAGQK   | LEKAGQKLIDVNHYA | YFDKAGQKTYERHSL  |
| O75508-9     | P0DTC1-618  | ?LALCA    | LILLALCALVATIWF | KFLALCADSIIGGA   |
| O75508-9     | P0DTC1-667  | LALCA     | LILLALCALVATIWF | LALCADSIIGGAKL   |
| O75508-9     | P0DTC1-1206 | ?LALCA    | LILLALCALVATIWF | VNKFLALCADSIIG   |
| P02511-11    | P0DTD1-940  | IRRP      | MDIAIHPWIRRP    | IRRPFLCCKCCYDHV  |
| P02511-11    | P0DTD1-1174 | IRRP      | MDIAIHPWIRRP    | SQTSLRGACIRRP    |

|           |             |          |                 |                     |
|-----------|-------------|----------|-----------------|---------------------|
| P02511-11 | P0DTD1-1229 | IRRP     | MDIAIHPWIRRP    | TSLRCGACIRRP        |
| P08238-16 | P0DTD1-789  | ?LFENK   | PFDLFENK        | DGVDVELFENK         |
| P08238-16 | P0DTD1-992  | LFENK    | PFDLFENK        | LFENK               |
| P08238-16 | P0DTD1-1246 | ?LFENK   | PFDLFENK        | VDVELFENK           |
| P08238-16 | P0DTD1-1312 | ?LFENK   | PFDLFENK        | YTKVDGVDVELFENK     |
| P07196-13 | P0DTC1-333  | EEVLS    | QARYEEVLS       | EEVLS               |
| P07196-13 | P0DTC1-461  | EEVLS    | QARYEEVLS       | GFGDSVEEVLS         |
| P07196-13 | P0DTC1-1204 | EEVLS    | QARYEEVLS       | VLVRGFGDSVEEVLS     |
| P07196-13 | P0DTC1-1219 | EEVLS    | QARYEEVLS       | VRGFGDSVEEVLS       |
| Q13813-24 | P0DTC1-505  | ??KAGQK  | QSRIDALEKAGQK   | HLYFDKAGQK          |
| Q13813-24 | P0DTC1-1015 | ??KAGQK  | QSRIDALEKAGQK   | SIHLYFDKAGQK        |
| Q13813-24 | P0DTC1-1260 | ??KAGQK  | QSRIDALEKAGQK   | YFDKAGQK            |
| P09543-16 | P0DTD1-274  | ??GKPVP  | RAIFTGYYGKGKPVP | DASGKPVP            |
| P09543-16 | P0DTC1-256  | ??GKPVP  | RAIFTGYYGKGKPVP | DASGKPVP            |
| P09543-16 | P0DTC1-314  | ??GKPVP  | RAIFTGYYGKGKPVP | ECTIFKDASGKPVP      |
| P09543-16 | P0DTC1-1010 | ?GKPVP   | RAIFTGYYGKGKPVP | SGKPVP              |
| Q9BZR6-16 | P0DTC2-29   | LQELG    | RCGLQELG        | SLIDLQELG           |
| Q9BZR6-16 | P0DTC2-61   | LQELG    | RCGLQELG        | ESLIDLQELG          |
| Q9BZR6-16 | P0DTC2-202  | LQELG    | RCGLQELG        | LIDLQELG            |
| Q9BZR6-16 | P0DTC2-246  | LQELG    | RCGLQELG        | LNEVAKNLNESLIDLQELG |
| Q9BZR6-16 | P0DTC2-277  | LQELG    | RCGLQELG        | SLIDLQELG           |
| Q9BZR6-16 | P0DTC2-509  | LQELG    | RCGLQELG        | LNESLIDLQELG        |
| P10809-15 | P0DTD1-715  | KGVIT    | SDAMKKVGRKGVIT  | YKGVITHDV           |
| P10809-15 | P0DTD1-1111 | K??KGVIT | SDAMKKVGRKGVIT  | QCFKMFYKGVITHDV     |
| P23297-4  | P0DTD1-795  | VAALT    | VAALT           | DKRTTCFSVAALT       |
| P23297-4  | P0DTD1-1012 | VAALT    | VAALT           | LLDKRTTCFSVAALT     |
| P23297-4  | P0DTD1-1150 | VAALT    | VAALT           | RTTCFSVAALT         |
| P23297-4  | P0DTD1-1189 | VAALT    | VAALT           | TCFSVAALT           |
| P08238-20 | P0DTC1-31   | ??SAFVE  | VANSFAFVER      | ILASFASSTSAFVET     |
| P08238-20 | P0DTC1-208  | ??SAFVE? | VANSFAFVER      | ASFASSTSAFVET       |
| P08238-20 | P0DTC1-211  | ??SAFVE? | VANSFAFVER      | ASTSAFVET           |
| P09972-8  | P0DTC5-13   | VLA      | VLA             | TLACFVLA            |
| P09972-8  | P0DTC5-22   | VLA      | VLA             | FLWLLWPVTLACFVLA    |

|               |             |              |                               |                                        |
|---------------|-------------|--------------|-------------------------------|----------------------------------------|
| P09972-8      | P0DTC5-101  | LAAYV?       | VLAAYVKALSDHHVY               | LAAYVRINW                              |
| P09972-8      | P0DTC5-105  | VLAAY        | VLAAYVKALSDHHVY               | LLWPVTLACFVLAAY                        |
| P29401-26     | P0DTD1-255  | AEAEL        | VWAEAGFLAEAELLN               | AEAELAKNV                              |
| P29401-26     | P0DTC1-129  | AEAEL        | VWAEAGFLAEAELLN               | TLVATAEAELAKNVSL                       |
| P29401-26     | P0DTC1-212  | AEAEL        | VWAEAGFLAEAELLN               | ATAEAELAKNVSLDN                        |
| P29401-26     | P0DTC1-787  | AEAEL        | VWAEAGFLAEAELLN               | LVATAEAELAKNVSL                        |
| P29401-26     | P0DTC1-802  | AEAEL        | VWAEAGFLAEAELLN               | MEKLKTLVATAEAEL                        |
| P09972-9      | P0DTC1-872  | VTALR        | YTPEEIAMATVTALR               | NSPNLAWPLIVTALR                        |
| P09972-9      | P0DTC1-903  | VTALR        | YTPEEIAMATVTALR               | PNLAWPLIVTALRAN                        |
| P09543-19     | P0DTD1-274  | ??GKPVP      | YYGKGKPVPTQGSRK               | DASGKPVVPY                             |
| P09543-19     | P0DTC1-256  | ??GKPVP      | YYGKGKPVPTQGSRK               | DASGKPVVPYCYDTNV                       |
| P09543-19     | P0DTC1-314  | ??GKPVP      | YYGKGKPVPTQGSRK               | ECTIFKDASGKPVVPY                       |
| P09543-19     | P0DTC1-1010 | ?GKPVP       | YYGKGKPVPTQGSRK               | SGKPVVPYCYDTNVLE                       |
| P01042-2      | P0DTC1-102  | AVDAA        | DKDLFKAVDAALKK                | LSFCFAVDAAKAY                          |
| P05783-19     | P0DTC9-332  | G???AS??SSRS | FGGPGTASRPSSRS                | LPQGTTLPGFYAEGSRGGSQASSRSSSRSRNSSRNSTP |
| P05783-19     | P0DTC9-441  | AS??SSRS     | FGGPGTASRPSSRS                | ASSRSSSRSRNSSRN                        |
| P05783-19     | P0DTC9-454  | G???AS??SSRS | FGGPGTASRPSSRS                | GGSQASSRSSSRSRN                        |
| P05783-19     | P0DTC9-501  | G???AS??SSRS | FGGPGTASRPSSRS                | SRGGSQASSRSSRS                         |
| P05783-19     | P0DTC9-502  | SSRS         | FGGPGTASRPSSRS                | SRSSSRSRNSSRNST                        |
| P01042-3      | P0DTC1-102  | AVDAA        | NDKDLFKAVDAALKK               | LSFCFAVDAAKAY                          |
| P05783-20     | P0DTC1-80   | LGSAL        | SLGSALRPSTSR                  | GMNGRTILGSALLED                        |
| P05783-20     | P0DTC1-560  | LGSAL        | SLGSALRPSTSR                  | ILGSALLEDEFTPF                         |
| P05783-20     | P0DTC1-839  | LGSAL        | SLGSALRPSTSR                  | NGRTILGSALLEDEF                        |
| P05783-20     | P0DTC1-973  | LGSAL        | SLGSALRPSTSR                  | RTILGSALLEDEFTP                        |
| P05783-21     | P0DTC1-80   | LGSAL        | SLGSALRPSTSRSLY               | GMNGRTILGSALLED                        |
| P05783-21     | P0DTC1-560  | LGSAL        | SLGSALRPSTSRSLY               | ILGSALLEDEFTPF                         |
| P05783-21     | P0DTC1-839  | LGSAL        | SLGSALRPSTSRSLY               | NGRTILGSALLEDEF                        |
| P05783-21     | P0DTC1-973  | LGSAL        | SLGSALRPSTSRSLY               | RTILGSALLEDEFTP                        |
| P62736-6      | P0DTC1-501  | EKSYE        | SSSSLEKSYELPDGQVI             | HEIAWYTERSEKSYE                        |
| Q16695-3      | P0DTC8-7    | ARKSA        | VARKSAPATGGVKKPHRYRPG<br>TVAL | FYSKWYIRVGARKSA                        |
| P01042-4      | P0DTC1-102  | AVDAA        | DKDLFKAVDAALKKYN              | LSFCFAVDAAKAY                          |
| A0A0C4DGB6-15 | P0DTC1-34   | TFLKK        | DNEETFLKKYLYEIARRHP           | ITFLKKDAPYIVGDV                        |

|               |             |              |                       |                  |
|---------------|-------------|--------------|-----------------------|------------------|
| A0A0C4DGB6-15 | P0DTC1-214  | D???TFLKK    | DNEETFLKKYLYEIARRHP   | ATLVSDIDITFLKKD  |
| A0A0C4DGB6-15 | P0DTC1-535  | TFLKK        | DNEETFLKKYLYEIARRHP   | IDITFLKKDAPYIVG  |
| A0A0C4DGB6-15 | P0DTC1-791  | D???TFLKK    | DNEETFLKKYLYEIARRHP   | LVSDIDITFLKKDAP  |
| A0A0C4DGB6-15 | P0DTC1-988  | D???TFLKK    | DNEETFLKKYLYEIARRHP   | SDIDITFLKKDAPYI  |
| P01042-5      | P0DTC1-102  | AVDAA        | NDKDLFKAVDAALKKYN     | LSFCAFAVDAAKAY   |
| P11586-2      | P0DTD1-377  | QVNGL        | FYDIDLDPETEQVNGLF     | NHTKKWKYPQVNGLT  |
| P11586-2      | P0DTD1-461  | QVNGL        | FYDIDLDPETEQVNGLF     | YPQVNGLTSI       |
| P11586-2      | P0DTD1-543  | QVNGL        | FYDIDLDPETEQVNGLF     | KYPQVNGLTSIKWAD  |
| P11586-2      | P0DTC1-142  | QVNGL        | FYDIDLDPETEQVNGLF     | YPQVNGLTSIKWAD   |
| P11586-2      | P0DTC1-633  | QVNGL        | FYDIDLDPETEQVNGLF     | KKWKYPQVNGLTSIK  |
| P11586-2      | P0DTC1-749  | QVNGL        | FYDIDLDPETEQVNGLF     | LNHTKKWKYPQVNGL  |
| P11586-2      | P0DTC1-953  | QVNGL        | FYDIDLDPETEQVNGLF     | QVNGLTSIKWADNNC  |
| P11586-2      | P0DTC1-1245 | QVNGL        | FYDIDLDPETEQVNGLF     | WKYPQVNGLTSIKWA  |
| Q86V81-2      | P0DTD1-51   | LDAYN        | SAEELDAQLDAYNARMDTS   | LDAYNMMISAGFSLW  |
| Q86V81-2      | P0DTD1-119  | LDAYN        | SAEELDAQLDAYNARMDTS   | YLDAYNMMI        |
| Q86V81-2      | P0DTD1-902  | A?E????LDAYN | SAEELDAQLDAYNARMDTS   | HANEYRLYLDAYNMM  |
| Q86V81-2      | P0DTD1-1045 | LDAYN        | SAEELDAQLDAYNARMDTS   | LYLDAYNMMISAGFS  |
| Q86V81-2      | P0DTD1-1135 | A?E????LDAYN | SAEELDAQLDAYNARMDTS   | RHHANEYRLYLDAYN  |
| P08575-3      | P0DTC1-1072 | ???KALRK     | DIFQVVKALRK           | TEMLAKALRKVPTDN  |
| P08575-4      | P0DTC1-1072 | ???KALRK     | DIFQVVKALRKA          | TEMLAKALRKVPTDN  |
| P08575-5      | P0DTC1-1072 | ???KALRK     | DIFQVVKALRKARP        | TEMLAKALRKVPTDN  |
| P08575-6      | P0DTC1-1072 | ???KALRK     | DIFQVVKALRKARPG       | TEMLAKALRKVPTDN  |
| Q00653        | P0DTC1-265  | DFKLN        | NPGLDGIIEYDDFKLNSS    | DFKLNEEIAILASF   |
| Q00653        | P0DTC1-661  | DFKLN        | NPGLDGIIEYDDFKLNSS    | KVNINIVGDFKLNEE  |
| Q00653        | P0DTC1-848  | DFKLN        | NPGLDGIIEYDDFKLNSS    | NINIVGDFKLNEEIA  |
| Q00653        | P0DTC1-851  | DFKLN        | NPGLDGIIEYDDFKLNSS    | NIVGDFKLNEEIAII  |
| Q00653        | P0DTC1-1182 | DFKLN        | NPGLDGIIEYDDFKLNSS    | VGDFKLNEEIAIILA  |
| P08575-7      | P0DTC1-1072 | ???KALRK     | VDIFQVVKALRKARP       | TEMLAKALRKVPTDN  |
| P08575-8      | P0DTC1-1072 | ???KALRK     | VDIFQVVKALRKARPG      | TEMLAKALRKVPTDN  |
| P08575-9      | P0DTC1-1072 | ???KALRK     | VVDIFQVVKALRKA        | TEMLAKALRKVPTDN  |
| P08575-10     | P0DTC1-1072 | ???KALRK     | VVDIFQVVKALRKARP      | TEMLAKALRKVPTDN  |
| I3L0Y5-1      | P0DTC2-13   | ?GAGAA       | DIDTAAKFIGAGAA TVGVAG | GWTFGAGAA LQIPFA |
| I3L0Y5-1      | P0DTC2-41   | GAGAA        | DIDTAAKFIGAGAA TVGVAG | GAGAA LQIPFAMQMA |

|           |            |            |                               |                                   |
|-----------|------------|------------|-------------------------------|-----------------------------------|
| I3L0Y5-1  | P0DTC2-400 | T????GAGAA | DIDTAAKFI <b>GAGA</b> ATVGVAG | TITSGWTF <b>GAGAA</b> LQ          |
| I3L0Y5-1  | P0DTC2-684 | ?GAGAA     | DIDTAAKFI <b>GAGA</b> ATVGVAG | WTF <b>GAGAA</b> L                |
| I3L0Y5-1  | P0DTC2-965 | ?GAGAA     | DIDTAAKFI <b>GAGA</b> ATVGVAG | F <b>GAGAA</b> LQIPFAMQM          |
| K7ERT8-2  | P0DTC8-3   | RKSAP      | RRQPKYP <b>RKSAP</b> R        | RVGARK <b>SAP</b> L               |
| K7ERT8-2  | P0DTC8-9   | RKSAP      | RRQPKYP <b>RKSAP</b> R        | SKWYIRVGARK <b>SAP</b> L          |
| K7ERT8-2  | P0DTC8-11  | RKSAP      | RRQPKYP <b>RKSAP</b> R        | YIRVGARK <b>SAP</b> LIEL          |
| K7ERT8-2  | P0DTC8-12  | RKSAP      | RRQPKYP <b>RKSAP</b> R        | A <b>RKSAP</b> LIELCVDEA          |
| K7ERT8-2  | P0DTC8-68  | RKSAP      | RRQPKYP <b>RKSAP</b> R        | GARK <b>SAP</b> LIELCVDE          |
| K7ERT8-2  | P0DTC8-82  | RKSAP      | RRQPKYP <b>RKSAP</b> R        | RVGARK <b>SAP</b> LIELCV          |
| P05783-23 | P0DTC1-80  | LGSAL      | SLGSALRPSTS                   | GMNGRTL <b>LGSAL</b> LED          |
| P05783-23 | P0DTC1-560 | LGSAL      | SLGSALRPSTS                   | IL <b>LGSAL</b> LEDEFTPF          |
| P05783-23 | P0DTC1-839 | LGSAL      | SLGSALRPSTS                   | NGRTL <b>LGSAL</b> LEDEF          |
| P05783-23 | P0DTC1-973 | LGSAL      | SLGSALRPSTS                   | RTL <b>LGSAL</b> LEDEFTP          |
| H7C2W9-7  | P0DTC2-137 | VTYVP      | SPNKLYTL <b>VTYVP</b> VTTF    | H <b>VTYVP</b> PAQEKNF            |
| H7C2W9-7  | P0DTC2-212 | ????VTYVP  | SPNKLYTL <b>VTYVP</b> VTTF    | APHGVVFLH <b>VTYVP</b> PAQEKNF    |
| H7C2W9-7  | P0DTC2-306 | ????VTYVP  | SPNKLYTL <b>VTYVP</b> VTTF    | APHGVVFLH <b>VTYVP</b> A          |
| H7C2W9-7  | P0DTC2-422 | VTYVP      | SPNKLYTL <b>VTYVP</b> VTTF    | <b>VTYVP</b> PAQEK                |
| H7C2W9-7  | P0DTC2-565 | VTYVP      | SPNKLYTL <b>VTYVP</b> VTTF    | <b>VTYVP</b> PAQEKNF              |
| H7C2W9-7  | P0DTC2-615 | VTYVP      | SPNKLYTL <b>VTYVP</b> VTTF    | H <b>VTYVP</b> PAQEK              |
| Q5RI18-3  | P0DTC5-21  | EE??KLLEQ? | VELQKEEAQ <b>KLLEQ</b> Y      | EELK <b>KLLEQ</b> WNLVIGFLF       |
| Q5RI18-3  | P0DTC5-35  | KLLEQ?     | VELQKEEAQ <b>KLLEQ</b> Y      | <b>KLLEQ</b> WNLV                 |
| Q5RI18-3  | P0DTC5-39  | EE??KLLEQ  | VELQKEEAQ <b>KLLEQ</b> Y      | MADSNGTITVEELK <b>KLLEQ</b>       |
| Q5RI18-3  | P0DTC5-71  | ?KLLEQ?    | VELQKEEAQ <b>KLLEQ</b> Y      | LK <b>KLLEQ</b> WNLVIGFL          |
| Q5RI18-3  | P0DTC5-79  | EE??KLLEQ  | VELQKEEAQ <b>KLLEQ</b> Y      | NGTITVEELK <b>KLLEQ</b>           |
| Q5RI18-3  | P0DTC5-93  | EE??KLLEQ? | VELQKEEAQ <b>KLLEQ</b> Y      | EELK <b>KLLEQ</b> WNLVIG          |
| Q5RI18-3  | P0DTC5-158 | EE??KLLEQ? | VELQKEEAQ <b>KLLEQ</b> Y      | GTITVEELK <b>KLLEQ</b> WN         |
| Q5RI18-3  | P0DTC5-163 | EE??KLLEQ? | VELQKEEAQ <b>KLLEQ</b> Y      | ITVEELK <b>KLLEQ</b> WNLV         |
| Q5RI18-3  | P0DTC5-173 | EE??KLLEQ? | VELQKEEAQ <b>KLLEQ</b> Y      | MADSNGTITVEELK <b>KLLEQ</b> WNLVI |
| Q5RI18-3  | P0DTC5-174 | EE??KLLEQ? | VELQKEEAQ <b>KLLEQ</b> Y      | NGTITVEELK <b>KLLEQ</b> W         |
| Q5RI18-3  | P0DTC5-180 | EE??KLLEQ  | VELQKEEAQ <b>KLLEQ</b> Y      | SNGTITVEELK <b>KLLEQ</b>          |
| Q5RI18-3  | P0DTC5-185 | EE??KLLEQ? | VELQKEEAQ <b>KLLEQ</b> Y      | TITVEELK <b>KLLEQ</b> WNL         |
| Q5RI18-3  | P0DTC5-188 | EE??KLLEQ? | VELQKEEAQ <b>KLLEQ</b> Y      | TVEELK <b>KLLEQ</b> WNLVI         |
| Q5RI18-3  | P0DTC5-201 | EE??KLLEQ? | VELQKEEAQ <b>KLLEQ</b> Y      | MADSNGTITVEELK <b>KLLEQ</b> WN    |

|          |             |         |              |                      |
|----------|-------------|---------|--------------|----------------------|
| O43318-1 | P0DTC2-68   | ?TNTSN? | ASTNTSNKSDTN | GTNTSNQVAVLYQDV      |
| O43318-1 | P0DTC2-116  | ?TNTSN? | ASTNTSNKSDTN | VSVITPGTNTSNQVA      |
| O43318-1 | P0DTC2-232  | ?TNTSN? | ASTNTSNKSDTN | GVSVITPGTNTSNQVAVLYQ |
| O43318-1 | P0DTC2-480  | ?TNTSN? | ASTNTSNKSDTN | GGVSVITPGTNTSNQ      |
| O43318-1 | P0DTC2-561  | ?TNTSN? | ASTNTSNKSDTN | VITPGTNTSNQVAVL      |
| O43318-1 | P0DTC2-1048 | ?TNTSN? | ASTNTSNKSDTN | ITPGTNTSNQVA         |
| O43318-1 | P0DTC2-1262 | ?TNTSN? | ASTNTSNKSDTN | TPGTNTSNQVAVLYQ      |
| O43318-2 | P0DTC2-68   | ?TNTSN? | DIASNTSNKSD  | GTNTSNQVAVLYQDV      |
| O43318-2 | P0DTC2-116  | ?TNTSN? | DIASNTSNKSD  | VSVITPGTNTSNQVA      |
| O43318-2 | P0DTC2-232  | ?TNTSN? | DIASNTSNKSD  | GVSVITPGTNTSNQVAVLYQ |
| O43318-2 | P0DTC2-480  | ?TNTSN? | DIASNTSNKSD  | GGVSVITPGTNTSNQ      |
| O43318-2 | P0DTC2-561  | ?TNTSN? | DIASNTSNKSD  | VITPGTNTSNQVAVL      |
| O43318-2 | P0DTC2-1048 | ?TNTSN? | DIASNTSNKSD  | ITPGTNTSNQVA         |
| O43318-2 | P0DTC2-1262 | ?TNTSN? | DIASNTSNKSD  | TPGTNTSNQVAVLYQ      |
| O43318-2 | P0DTC1-533  | DIAS?T  | DIASNTSNKSD  | IDGGVTRDIASDTC       |
| O43318-3 | P0DTC2-68   | ?TNTSN? | FMDIASNTSNK  | GTNTSNQVAVLYQDV      |
| O43318-3 | P0DTC2-116  | ?TNTSN? | FMDIASNTSNK  | VSVITPGTNTSNQVA      |
| O43318-3 | P0DTC2-232  | ?TNTSN? | FMDIASNTSNK  | GVSVITPGTNTSNQVAVLYQ |
| O43318-3 | P0DTC2-480  | ?TNTSN? | FMDIASNTSNK  | GGVSVITPGTNTSNQ      |
| O43318-3 | P0DTC2-561  | ?TNTSN? | FMDIASNTSNK  | VITPGTNTSNQVAVL      |
| O43318-3 | P0DTC2-1048 | ?TNTSN? | FMDIASNTSNK  | ITPGTNTSNQVA         |
| O43318-3 | P0DTC2-1262 | ?TNTSN? | FMDIASNTSNK  | TPGTNTSNQVAVLYQ      |
| O43318-3 | P0DTC1-533  | DIAS?T  | FMDIASNTSNK  | IDGGVTRDIASDTC       |
| Q7L8L6   | P0DTD1-532  | TSSSK   | GLEFSKTSSSKA | DAVTAYNGYLTSSSK      |
| Q7L8L6   | P0DTC1-123  | TSSSK   | GLEFSKTSSSKA | TAYNGYLTSSSKTP       |
| Q7L8L6   | P0DTC1-223  | TSSSK   | GLEFSKTSSSKA | AVTAYNGYLTSSSKT      |
| Q7L8L6   | P0DTC1-497  | TSSSK   | GLEFSKTSSSKA | GYLTSSSKTPEEHFI      |
| Q7L8L6   | P0DTC1-784  | TSSSK   | GLEFSKTSSSKA | LTSSSKTPEEHFIET      |
| Q7L8L6   | P0DTC1-1057 | TSSSK   | GLEFSKTSSSKA | TAYNGYLTSSSKTPE      |
| Q7L8L6   | P0DTC1-1282 | TSSSK   | GLEFSKTSSSKA | YNGYLTSSSKTPEEH      |
| Q15052   | P0DTC1-398  | F?ITGNT | GNDCTFEITGNT | EYCPIFFITGNTLQC      |
| Q15052   | P0DTC1-541  | F?ITGNT | GNDCTFEITGNT | IFFITGNTLQCIMLV      |
| O43318-4 | P0DTC2-68   | ?TNTSN? | IASNTSNKSDT  | GTNTSNQVAVLYQDV      |

|          |             |         |               |                      |
|----------|-------------|---------|---------------|----------------------|
| O43318-4 | P0DTC2-116  | ?TNTSN? | IASTNTSNKSDT  | VSVITPGTNTSNQVA      |
| O43318-4 | P0DTC2-232  | ?TNTSN? | IASTNTSNKSDT  | GVSVITPGTNTSNQVAVLYQ |
| O43318-4 | P0DTC2-480  | ?TNTSN? | IASTNTSNKSDT  | GGVSVITPGTNTSNQ      |
| O43318-4 | P0DTC2-561  | ?TNTSN? | IASTNTSNKSDT  | VITPGTNTSNQVAVL      |
| O43318-4 | P0DTC2-1048 | ?TNTSN? | IASTNTSNKSDT  | ITPGTNTSNQVA         |
| O43318-4 | P0DTC2-1262 | ?TNTSN? | IASTNTSNKSDT  | TPGTNTSNQVAVLYQ      |
| P25440   | P0DTC1-538  | KKGAK   | KKGAKLAALQGS  | IDYKHYTPSFKKGAK      |
| P57073   | P0DTC9-106  | APSAS   | KSAPSASASPTTE | YKHWPQIAQFAPSAS      |
| P57073   | P0DTC9-405  | PSASA   | KSAPSASASPTTE | PSASAFFGMSRIGMEVTPS  |
| P11161-1 | P0DTC9-3    | APSAS   | KSSAPSASVPA   | APSASAFFGM           |
| P11161-1 | P0DTC9-4    | APSAS   | KSSAPSASVPA   | AQFAPSASA            |
| P11161-1 | P0DTC9-5    | APSAS   | KSSAPSASVPA   | AQFAPSASAFFGMSR      |
| P11161-1 | P0DTC9-38   | APSAS   | KSSAPSASVPA   | FAPSASAFF            |
| P11161-1 | P0DTC9-73   | APSAS   | KSSAPSASVPA   | WPQIAQFAPSASAFF      |
| P11161-1 | P0DTC9-103  | APSAS   | KSSAPSASVPA   | QFAPSASAFFGMSRI      |
| P11161-1 | P0DTC9-106  | APSAS   | KSSAPSASVPA   | YKHWPQIAQFAPSAS      |
| P11161-1 | P0DTC9-107  | APSAS   | KSSAPSASVPA   | AQFAPSASAF           |
| P11161-1 | P0DTC9-178  | APSAS   | KSSAPSASVPA   | QFAPSASAFF           |
| P11161-1 | P0DTC9-440  | APSAS   | KSSAPSASVPA   | APSASAFFGMSRIGM      |
| P11161-1 | P0DTC9-461  | APSAS   | KSSAPSASVPA   | IAQFAPSASAFFGMS      |
| Q75MD7-2 | P0DTC2-13   | ?GAGAA  | LGAGAAGGGGAG  | GWTFGAGAALQIPFA      |
| Q75MD7-2 | P0DTC2-41   | GAGAA   | LGAGAAGGGGAG  | GAGAALQIPFAMQMA      |
| Q75MD7-2 | P0DTC2-400  | ?GAGAA  | LGAGAAGGGGAG  | TITSGWTFGAGAALQ      |
| Q75MD7-2 | P0DTC2-684  | ?GAGAA  | LGAGAAGGGGAG  | WTFGAGAAL            |
| Q75MD7-2 | P0DTC2-965  | ?GAGAA  | LGAGAAGGGGAG  | FGAGAALQIPFAMQM      |
| O43318-5 | P0DTC2-68   | ?TNTSN? | MDIASTNTSNKS  | GTNTSNQVAVLYQDV      |
| O43318-5 | P0DTC2-116  | ?TNTSN? | MDIASTNTSNKS  | VSVITPGTNTSNQVA      |
| O43318-5 | P0DTC2-232  | ?TNTSN? | MDIASTNTSNKS  | GVSVITPGTNTSNQVAVLYQ |
| O43318-5 | P0DTC2-480  | ?TNTSN? | MDIASTNTSNKS  | GGVSVITPGTNTSNQ      |
| O43318-5 | P0DTC2-561  | ?TNTSN? | MDIASTNTSNKS  | VITPGTNTSNQVAVL      |
| O43318-5 | P0DTC2-1048 | ?TNTSN? | MDIASTNTSNKS  | ITPGTNTSNQVA         |
| O43318-5 | P0DTC2-1262 | ?TNTSN? | MDIASTNTSNKS  | TPGTNTSNQVAVLYQ      |
| O43318-5 | P0DTC1-533  | DIAS?T  | MDIASTNTSNKS  | IDGGVTRDIASDTC       |



|          |             |         |               |                      |
|----------|-------------|---------|---------------|----------------------|
| Q9ULK6   | P0DTC2-13   | GAGAA   | PDPGAGAAAGGGG | GWTFGAGAAALQIPFA     |
| Q9ULK6   | P0DTC2-41   | GAGAA   | PDPGAGAAAGGGG | GAGAAALQIPFAMQMA     |
| Q9ULK6   | P0DTC2-400  | GAGAA   | PDPGAGAAAGGGG | TITSGWTFGAGAAALQ     |
| Q9ULK6   | P0DTC2-684  | GAGAA   | PDPGAGAAAGGGG | WTFGAGAAAL           |
| Q9ULK6   | P0DTC2-965  | GAGAA   | PDPGAGAAAGGGG | FGAGAAALQIPFAMQM     |
| Q6ZV29   | P0DTC1-351  | KKPAS   | QGPSKKPASA    | LNQLTGYKKPASREL      |
| Q6ZV29   | P0DTC1-53   | KKPAS   | QGPSKKPASA    | GYKKPASRELKVTF       |
| Q6ZV29   | P0DTC1-159  | KKPAS   | QGPSKKPASA    | ADDLNQLTGYKKPAS      |
| Q6ZV29   | P0DTC1-283  | KKPAS   | QGPSKKPASA    | DLNQLTGYKKPASRE      |
| O43318-6 | P0DTC2-68   | ?TNTSN  | SFMDIASTNTSN  | GTNTSNQVAVLYQDV      |
| O43318-6 | P0DTC2-116  | ?TNTSN  | SFMDIASTNTSN  | VSVITPGTNTSNQVA      |
| O43318-6 | P0DTC2-232  | ?TNTSN  | SFMDIASTNTSN  | GVSVITPGTNTSNQVAVLYQ |
| O43318-6 | P0DTC2-480  | ?TNTSN  | SFMDIASTNTSN  | GGVSVITPGTNTSNQ      |
| O43318-6 | P0DTC2-561  | ?TNTSN  | SFMDIASTNTSN  | VITPGTNTSNQVAVL      |
| O43318-6 | P0DTC2-1048 | ?TNTSN  | SFMDIASTNTSN  | ITPGTNTSNQVA         |
| O43318-6 | P0DTC2-1262 | ?TNTSN  | SFMDIASTNTSN  | TPGTNTSNQVAVLYQ      |
| O43318-6 | P0DTC1-533  | DIAS?T  | SFMDIASTNTSN  | IDGGVTRDIASDTC       |
| O43318-7 | P0DTC2-68   | ?TNTSN? | STNTSNKSDTNM  | GTNTSNQVAVLYQDV      |
| O43318-7 | P0DTC2-116  | ?TNTSN? | STNTSNKSDTNM  | VSVITPGTNTSNQVA      |
| O43318-7 | P0DTC2-232  | ?TNTSN? | STNTSNKSDTNM  | GVSVITPGTNTSNQVAVLYQ |
| O43318-7 | P0DTC2-480  | ?TNTSN? | STNTSNKSDTNM  | GGVSVITPGTNTSNQ      |
| O43318-7 | P0DTC2-561  | ?TNTSN? | STNTSNKSDTNM  | VITPGTNTSNQVAVL      |
| O43318-7 | P0DTC2-1048 | ?TNTSN? | STNTSNKSDTNM  | ITPGTNTSNQVA         |
| O43318-7 | P0DTC2-1262 | ?TNTSN? | STNTSNKSDTNM  | TPGTNTSNQVAVLYQ      |
| Q8WXI7-1 | P0DTC1-176  | STVLS   | STVLSGVPTGAT  | AGNATEVPANSTVLS      |
| P34903   | P0DTC9-3    | APSAS?  | TISKGAAPSASS  | APSASAFFGM           |
| P34903   | P0DTC9-4    | APSAS?  | TISKGAAPSASS  | AQFAPSASA            |
| P34903   | P0DTC9-5    | APSAS?  | TISKGAAPSASS  | AQFAPSASAFFGMSR      |
| P34903   | P0DTC9-38   | APSAS?  | TISKGAAPSASS  | FAPSASAFF            |
| P34903   | P0DTC9-73   | APSAS?  | TISKGAAPSASS  | WPQIAQFAPSASAFF      |
| P34903   | P0DTC9-103  | APSAS?  | TISKGAAPSASS  | QFAPSASAFFGMSRI      |
| P34903   | P0DTC9-106  | APSAS   | TISKGAAPSASS  | YKHWPQIAQFAPSAS      |
| P34903   | P0DTC9-107  | APSAS?  | TISKGAAPSASS  | AQFAPSASAF           |



|               |             |              |                                     |                                                |
|---------------|-------------|--------------|-------------------------------------|------------------------------------------------|
| P34903        | P0DTC9-178  | APSAS?       | TISKGA <b>APSASS</b>                | QF <b>APSAS</b> AFF                            |
| P34903        | P0DTC9-440  | APSAS?       | TISKGA <b>APSASS</b>                | <b>APSAS</b> AFFGMSRIGM                        |
| P34903        | P0DTC9-461  | APSAS?       | TISKGA <b>APSASS</b>                | IAQF <b>APSAS</b> AFFGMS                       |
| P01042-6      | P0DTC1-102  | AVDAA        | DKDLFK <b>AVDA</b> ALKKYN           | LSFCAF <b>AVDA</b> AKAY                        |
| P01042-7      | P0DTC1-102  | AVDAA        | DLFK <b>AVDA</b> ALKK               | LSFCAF <b>AVDA</b> AKAY                        |
| A0A0C4DGB6-21 | P0DTC1-34   | TFLKK        | DNEET <b>TFLKK</b> YLYEIARRHPY      | IT <b>TFLKK</b> DAPYIVGDV                      |
| A0A0C4DGB6-21 | P0DTC1-214  | D???TFLKK    | DNEET <b>TFLKK</b> YLYEIARRHPY      | ATLVSDIDI <b>TFLKK</b> D                       |
| A0A0C4DGB6-21 | P0DTC1-535  | TFLKK        | DNEET <b>TFLKK</b> YLYEIARRHPY      | IDIT <b>TFLKK</b> DAPYIVG                      |
| A0A0C4DGB6-21 | P0DTC1-791  | D???TFLKK    | DNEET <b>TFLKK</b> YLYEIARRHPY      | LVSDIDI <b>TFLKK</b> DAP                       |
| A0A0C4DGB6-21 | P0DTC1-988  | D???TFLKK    | DNEET <b>TFLKK</b> YLYEIARRHPY      | SDIDI <b>TFLKK</b> DAPYI                       |
| P05783-24     | P0DTC9-332  | G???AS??SSRS | GGPGTASRP <b>SSRS</b> YVTTSTRY      | LPQGTTLPGKYAEGSRGGSQASSR <b>SSRS</b> RNSSRNSTP |
| P05783-24     | P0DTC9-441  | AS??SSRS     | GGPGTASRP <b>SSRS</b> YVTTSTRY      | ASSR <b>SSRS</b> RNSSRN                        |
| P05783-24     | P0DTC9-454  | G???AS??SSRS | GGPGTASRP <b>SSRS</b> YVTTSTRY      | GGSQASSR <b>SSRS</b> RN                        |
| P05783-24     | P0DTC9-501  | G???AS??SSRS | GGPGTASRP <b>SSRS</b> YVTTSTRY      | SRGGSQASSR <b>SSRS</b>                         |
| P05783-24     | P0DTC9-502  | SSRS         | GGPGTASRP <b>SSRS</b> YVTTSTRY      | SR <b>SSRS</b> RNSSRNST                        |
| P01042-8      | P0DTC1-102  | AVDAA        | KDLFK <b>AVDA</b> ALKKYN            | LSFCAF <b>AVDA</b> AKAY                        |
| H7C2W9-8      | P0DTC2-137  | VTYVP        | KLYTL <b>VTYVP</b> VTTF             | H <b>VTYVP</b> PAQEKNF                         |
| H7C2W9-8      | P0DTC2-212  | ???VTYVP     | KLYTL <b>VTYVP</b> VTTF             | APHGVVFLH <b>VTYVP</b> PAQEKNF                 |
| H7C2W9-8      | P0DTC2-306  | ???VTYVP     | KLYTL <b>VTYVP</b> VTTF             | APHGVVFLH <b>VTYVP</b> A                       |
| H7C2W9-8      | P0DTC2-422  | VTYVP        | KLYTL <b>VTYVP</b> VTTF             | <b>VTYVP</b> PAQEK                             |
| H7C2W9-8      | P0DTC2-565  | VTYVP        | KLYTL <b>VTYVP</b> VTTF             | <b>VTYVP</b> PAQEKNF                           |
| H7C2W9-8      | P0DTC2-615  | VTYVP        | KLYTL <b>VTYVP</b> VTTF             | H <b>VTYVP</b> PAQEK                           |
| P69905-29     | P0DTC4-1    | LVTLA        | <b>LVTLA</b> AHLPAEFTPAVHASLDK<br>F | FL <b>LVTLA</b> IL                             |
| P69905-29     | P0DTC4-2    | LVTLA        | <b>LVTLA</b> AHLPAEFTPAVHASLDK<br>F | FL <b>LVTLA</b> IL                             |
| P01042-9      | P0DTC1-102  | AVDAA        | NDKDLFK <b>AVDA</b> ALKKYN          | LSFCAF <b>AVDA</b> AKAY                        |
| P30153        | P0DTD1-1185 | RFNVA        | NVR <b>RFNVA</b> SLQKIGPI           | TAHSCNVN <b>RFNVA</b> IT                       |
| P30153        | P0DTC1-46   | ?NVAKS       | NVR <b>RFNVA</b> SLQKIGPI           | VLKKLKKSL <b>NVAKSE</b>                        |
| P30153        | P0DTC1-89   | ?NVAKS       | NVR <b>RFNVA</b> SLQKIGPI           | KLKKSL <b>NVAKSE</b> FDRD                      |
| P30153        | P0DTC1-656  | ?NVAKS       | NVR <b>RFNVA</b> SLQKIGPI           | KSL <b>NVAKSE</b> FDRDAA                       |
| P30153        | P0DTC1-714  | ?NVAKS       | NVR <b>RFNVA</b> SLQKIGPI           | LKKSL <b>NVAKSE</b> FDRD                       |
| P47914-2      | P0DTD1-819  | KPRSQ        | RKWHRNGIK <b>KPRSQ</b> RY           | EF <b>KPRSQ</b> MEIDFLEL                       |

|          |             |       |                                       |                           |
|----------|-------------|-------|---------------------------------------|---------------------------|
| P47914-2 | P0DTD1-969  | KPRSQ | RKWHNRNGIK <b>KPRSQ</b> RY            | <b>KPRSQ</b> MEIDFLELAM   |
| P47914-2 | P0DTD1-1023 | KPRSQ | RKWHNRNGIK <b>KPRSQ</b> RY            | LQEF <b>KPRSQ</b> MEIDFL  |
| P47914-2 | P0DTD1-1127 | KPRSQ | RKWHNRNGIK <b>KPRSQ</b> RY            | QSRNLQEF <b>KPRSQ</b> ME  |
| P47914-2 | P0DTD1-1144 | KPRSQ | RKWHNRNGIK <b>KPRSQ</b> RY            | RNLQEF <b>KPRSQ</b> MEID  |
| K7ERT8-4 | P0DTC8-3    | RKSAP | RLRRQPKYP <b>RKSAP</b> R              | RVGARK <b>SAP</b> L       |
| K7ERT8-4 | P0DTC8-9    | RKSAP | RLRRQPKYP <b>RKSAP</b> R              | SKWYIRVGARK <b>SAP</b> L  |
| K7ERT8-4 | P0DTC8-11   | RKSAP | RLRRQPKYP <b>RKSAP</b> R              | YIRVGARK <b>SAP</b> LIEL  |
| K7ERT8-4 | P0DTC8-12   | RKSAP | RLRRQPKYP <b>RKSAP</b> R              | <b>ARKSAP</b> LIELCVDEA   |
| K7ERT8-4 | P0DTC8-68   | RKSAP | RLRRQPKYP <b>RKSAP</b> R              | GARK <b>SAP</b> LIELCVDE  |
| K7ERT8-4 | P0DTC8-82   | RKSAP | RLRRQPKYP <b>RKSAP</b> R              | RVGARK <b>SAP</b> LIELCV  |
| C9JXB8-4 | P0DTD1-330  | SFSGY | <b>SFSGY</b> KIYPGHGRRYARTDGKV<br>F   | IEVNS <b>SFSGY</b>        |
| C9JXB8-4 | P0DTD1-504  | SFSGY | <b>SFSGY</b> KIYPGHGRRYARTDGKV<br>F   | NS <b>SFSGY</b> LKL       |
| C9JXB8-4 | P0DTD1-518  | SFSGY | <b>SFSGY</b> KIYPGHGRRYARTDGKV<br>F   | TIEVNS <b>SFSGY</b>       |
| C9JXB8-4 | P0DTD1-710  | SFSGY | <b>SFSGY</b> KIYPGHGRRYARTDGKV<br>F   | VQTIEVNS <b>SFSGY</b>     |
| C9JXB8-4 | P0DTC1-41   | SFSGY | <b>SFSGY</b> KIYPGHGRRYARTDGKV<br>F   | NS <b>SFSGY</b> LKLTDNVYI |
| C9JXB8-4 | P0DTC1-391  | SFSGY | <b>SFSGY</b> KIYPGHGRRYARTDGKV<br>F   | EVNS <b>SFSGY</b> LKLTDNV |
| C9JXB8-4 | P0DTC1-920  | SFSGY | <b>SFSGY</b> KIYPGHGRRYARTDGKV<br>F   | PVVQTIEVNS <b>SFSGY</b> L |
| C9JXB8-4 | P0DTC1-1217 | SFSGY | <b>SFSGY</b> KIYPGHGRRYARTDGKV<br>F   | VQTIEVNS <b>SFSGY</b> LKL |
| C9JXB8-5 | P0DTD1-330  | SFSGY | <b>SFSGY</b> KIYPGHGRRYARTDGKV<br>FQF | IEVNS <b>SFSGY</b>        |
| C9JXB8-5 | P0DTD1-504  | SFSGY | <b>SFSGY</b> KIYPGHGRRYARTDGKV<br>FQF | NS <b>SFSGY</b> LKL       |
| C9JXB8-5 | P0DTD1-518  | SFSGY | <b>SFSGY</b> KIYPGHGRRYARTDGKV<br>FQF | TIEVNS <b>SFSGY</b>       |

|           |             |          |                               |                    |
|-----------|-------------|----------|-------------------------------|--------------------|
| C9JXB8-5  | P0DTD1-710  | SFSGY    | SFSGYKIYPGHGRRYARTDGKV<br>FQF | VQTIEVNSFSGY       |
| C9JXB8-5  | P0DTC1-41   | SFSGY    | SFSGYKIYPGHGRRYARTDGKV<br>FQF | NSFSGYLKLTDNVYI    |
| C9JXB8-5  | P0DTC1-391  | SFSGY    | SFSGYKIYPGHGRRYARTDGKV<br>FQF | EVNSFSGYLKLTDNV    |
| C9JXB8-5  | P0DTC1-920  | SFSGY    | SFSGYKIYPGHGRRYARTDGKV<br>FQF | PVVQTIEVNSFSGYL    |
| C9JXB8-5  | P0DTC1-1217 | SFSGY    | SFSGYKIYPGHGRRYARTDGKV<br>FQF | VQTIEVNSFSGYLKL    |
| K7ERT8-6  | P0DTC8-3    | RKSAP    | TLRLRRQPKYP RKSAPRRNKLD<br>HY | RVGAR KSA PL       |
| K7ERT8-6  | P0DTC8-9    | RKSAP    | TLRLRRQPKYP RKSAPRRNKLD<br>HY | SKWYIRVGAR KSA PL  |
| K7ERT8-6  | P0DTC8-11   | RKSAP    | TLRLRRQPKYP RKSAPRRNKLD<br>HY | YIRVGAR KSA PLIEL  |
| K7ERT8-6  | P0DTC8-12   | RKSAP    | TLRLRRQPKYP RKSAPRRNKLD<br>HY | A R KSA PLIELCVDEA |
| K7ERT8-6  | P0DTC8-68   | RKSAP    | TLRLRRQPKYP RKSAPRRNKLD<br>HY | GAR KSA PLIELCVDE  |
| K7ERT8-6  | P0DTC8-82   | RKSAP    | TLRLRRQPKYP RKSAPRRNKLD<br>HY | RVGAR KSA PLIELCV  |
| P08575-11 | P0DTC1-1072 | ???KALRK | VDIFQVV KALRK                 | TEMLA KALRK VPTDN  |
| P08575-12 | P0DTC1-1072 | ???KALRK | VVDIFQVV KALRK                | TEMLA KALRK VPTDN  |
| P37108-3  | P0DTC5-36   | LLESE    | V LLESE QFLTE                 | LLESELVIGAVILRGHLR |
| P37108-3  | P0DTC5-64   | LLESE    | V LLESE QFLTE                 | HGTILTRP LLESELV   |
| P37108-3  | P0DTC5-72   | LLESE    | V LLESE QFLTE                 | LLESELVIGAVILRG    |
| P37108-3  | P0DTC5-76   | LLESE    | V LLESE QFLTE                 | LTRP LLESELVIGAV   |
| P37108-3  | P0DTC5-97   | LLESE    | V LLESE QFLTE                 | GTILTRP LLESELVI   |
| P37108-3  | P0DTC5-117  | LLESE    | V LLESE QFLTE                 | RP LLESEL          |
| P37108-3  | P0DTC5-118  | LLESE    | V LLESE QFLTE                 | RP LLESELVIGAVIL   |
| P37108-3  | P0DTC5-214  | LLESE    | V LLESE QFLTE                 | PLHGTILTRP LLESE   |
| P37108-3  | P0DTC5-216  | LLESE    | V LLESE QFLTE                 | TILTRP LLESELVIG   |

|           |             |            |                       |                       |
|-----------|-------------|------------|-----------------------|-----------------------|
| P05783-26 | P0DTC1-80   | LGSAL      | SLGSALRPSTSRSLYA      | GMNGRTILGSALLED       |
| P05783-26 | P0DTC1-560  | LGSAL      | SLGSALRPSTSRSLYA      | ILGSALLEDEFTPF        |
| P05783-26 | P0DTC1-839  | LGSAL      | SLGSALRPSTSRSLYA      | NGRTILGSALLEDEF       |
| P05783-26 | P0DTC1-973  | LGSAL      | SLGSALRPSTSRSLYA      | RTILGSALLEDEFTP       |
| Q13630-17 | P0DTC8-3    | ?VGARK     | NVLHSAFEVGARKVV       | RVGARKSAPL            |
| Q13630-17 | P0DTC8-7    | ??VGARK    | NVLHSAFEVGARKVV       | FYSKWYIRVGARKSA       |
| Q13630-17 | P0DTC8-9    | ??VGARK    | NVLHSAFEVGARKVV       | SKWYIRVGARKSAPL       |
| Q13630-17 | P0DTC8-11   | ??VGARK    | NVLHSAFEVGARKVV       | YIRVGARKSAPLIEL       |
| Q13630-17 | P0DTC8-82   | ?VGARK     | NVLHSAFEVGARKVV       | RVGARKSAPLIELCV       |
| P15880-2  | P0DTC2-244  | SYLTP      | DAISKTSYLTPLDW        | LHRSYLTPGDSSSGWTAGAA  |
| P15880-2  | P0DTC2-254  | SYLTP      | DAISKTSYLTPLDW        | NITRFQTLALHRSYLTPGD   |
| P15880-2  | P0DTC2-739  | SYLTP      | DAISKTSYLTPLDW        | ALHRSYLTPGDSSSG       |
| P15880-2  | P0DTC2-840  | SYLTP      | DAISKTSYLTPLDW        | LLALHRSYLTPGDSSS      |
| P15880-2  | P0DTC2-945  | SYLTP      | DAISKTSYLTPLDW        | QTLALHRSYLTPGDSS      |
| P15880-2  | P0DTC2-1039 | SYLTP      | DAISKTSYLTPLDW        | HRSYLTPGDSSS          |
| P15880-2  | P0DTC2-1059 | SYLTP      | DAISKTSYLTPLDW        | LALHRSYLTPGD          |
| P15880-2  | P0DTC2-1060 | SYLTP      | DAISKTSYLTPLDW        | LALHRSYLTPGDSSSGWT    |
| P15880-2  | P0DTC2-1135 | SYLTP      | DAISKTSYLTPLDW        | SYLTPGDSSSGW          |
| P15880-2  | P0DTC2-1238 | SYLTP      | DAISKTSYLTPLDW        | QTLALHRSYLTPGD        |
| P15880-2  | P0DTC2-1256 | SYLTP      | DAISKTSYLTPLDW        | SYLTPGDSSSGWTAG       |
| P23528-8  | P0DTD1-419  | KEILV      | EEGKEILVGDVGQTVDDPYAT | TLKEILVTY             |
| P23528-8  | P0DTD1-536  | KEILV      | EEGKEILVGDVGQTVDDPYAT | GNCDTLKEILVTYNC       |
| P23528-8  | P0DTD1-806  | KEILV      | EEGKEILVGDVGQTVDDPYAT | DTLKEILVTYNCCDD       |
| P23528-8  | P0DTD1-820  | KEILV      | EEGKEILVGDVGQTVDDPYAT | EGNCDTLKEILVTYN       |
| P23528-8  | P0DTD1-855  | KEILV      | EEGKEILVGDVGQTVDDPYAT | FDEGNCDTLKEILVT       |
| P23528-8  | P0DTD1-1004 | KEILV      | EEGKEILVGDVGQTVDDPYAT | LKEILVTYNCCDDDY       |
| P05164-3  | P0DTC2-62   | V????DQLTP | VSNEIVRFPTDQLTPD      | EVPAIAHADQLTPTW       |
| P05164-3  | P0DTC2-173  | ???IVRFP   | VSNEIVRFPTDQLTPD      | VQPTESIVRFPNITNLCPF   |
| P05164-3  | P0DTC2-221  | V????DQLTP | VSNEIVRFPTDQLTPD      | DVNCTEVPVAIAHADQLTPTW |
| P05164-3  | P0DTC2-235  | ?DQLTP     | VSNEIVRFPTDQLTPD      | IHADQLTPTRVYSTGSNVF   |
| P05164-3  | P0DTC2-302  | ?DQLTP     | VSNEIVRFPTDQLTPD      | ADQLTPTRVYSTGS        |
| P05164-3  | P0DTC2-345  | IVRFP      | VSNEIVRFPTDQLTPD      | IVRFPNITNLCPFGE       |
| P05164-3  | P0DTC2-377  | V????DQLTP | VSNEIVRFPTDQLTPD      | PVAIAHADQLTPTRV       |

|          |             |            |                  |                                              |
|----------|-------------|------------|------------------|----------------------------------------------|
| P05164-3 | P0DTC2-379  | ???IVRFP   | VSNEIVRFPDQLTPD  | QPTESIVRFPNITNL                              |
| P05164-3 | P0DTC2-393  | ???IVRFP   | VSNEIVRFPDQLTPD  | SNFRVQPTESIVRFP                              |
| P05164-3 | P0DTC2-517  | ???IVRFP   | VSNEIVRFPDQLTPD  | NFRVQPTESIVRFPN                              |
| P05164-3 | P0DTC2-542  | ?IVRFP     | VSNEIVRFPDQLTPD  | SIVRFPNITNLCFPG                              |
| P05164-3 | P0DTC2-619  | ?DQLTP     | VSNEIVRFPTDQLTPD | IHADQLTPTW                                   |
| P05164-3 | P0DTC2-669  | ???IVRFP   | VSNEIVRFPDQLTPD  | TESIVRFPNITNL                                |
| P05164-3 | P0DTC2-673  | V????DQLTP | VSNEIVRFPTDQLTPD | VAIHADQLTPTW                                 |
| P05164-3 | P0DTC2-722  | V????DQLTP | VSNEIVRFPTDQLTPD | EVPVAIHADQLTPWVRVYSTGNSNVFQTRA               |
| P05164-3 | P0DTC2-765  | ?DQLTP     | VSNEIVRFPTDQLTPD | ADQLTPWVRVYSTGSN                             |
| P05164-3 | P0DTC2-776  | V????DQLTP | VSNEIVRFPTDQLTPD | CTEVPVAIHADQLTP                              |
| P05164-3 | P0DTC2-786  | DQLTP      | VSNEIVRFPTDQLTPD | DQLTPWVRVYSTGSNV                             |
| P05164-3 | P0DTC2-796  | V????DQLTP | VSNEIVRFPTDQLTPD | EVPVAIHADQLTPWVR                             |
| P05164-3 | P0DTC2-815  | ?DQLTP     | VSNEIVRFPTDQLTPD | HADQLTPWVRVYSTGS                             |
| P05164-3 | P0DTC2-822  | ?DQLTP     | VSNEIVRFPTDQLTPD | IHADQLTPWVRVYSTG                             |
| P05164-3 | P0DTC2-823  | ?DQLTP     | VSNEIVRFPTDQLTPD | IHADQLTPWVRVYSTGNSNVFQTR                     |
| P05164-3 | P0DTC2-844  | V????DQLTP | VSNEIVRFPTDQLTPD | NCTEVPVAIHADQLTP                             |
| P05164-3 | P0DTC2-863  | V????DQLTP | VSNEIVRFPTDQLTPD | PVAIHADQLTPWVRVY                             |
| P05164-3 | P0DTC2-865  | V????DQLTP | VSNEIVRFPTDQLTPD | QDVNCTEVPVAIHADQLTPWVRVYS                    |
| P05164-3 | P0DTC2-895  | V????DQLTP | VSNEIVRFPTDQLTPD | TEVPVAIHADQLTPTW                             |
| P05164-3 | P0DTC2-905  | V????DQLTP | VSNEIVRFPTDQLTPD | VAIHADQLTPWVRVYS                             |
| P05164-3 | P0DTC2-916  | V????DQLTP | VSNEIVRFPTDQLTPD | VPVAIHADQLTPWVRV                             |
| P05164-3 | P0DTC2-925  | ???IVRFP   | VSNEIVRFPDQLTPD  | CTLKSFTVEKGIYQTSNFRVQPTESIVRFPNITNLCFPG      |
| P05164-3 | P0DTC2-938  | V????DQLTP | VSNEIVRFPTDQLTPD | PVAIHADQLTPWVRVYSTGNSNVFQTRAGCLIGAEHVN<br>NS |
| P05164-3 | P0DTC2-943  | ?DQLTP     | VSNEIVRFPTDQLTPD | IHADQLTPWVRVYSTGS                            |
| P05164-3 | P0DTC2-985  | ?DQLTP     | VSNEIVRFPTDQLTPD | ADQLTPWVRVYS                                 |
| P05164-3 | P0DTC2-990  | ?DQLTP     | VSNEIVRFPTDQLTPD | AIHADQLTPWVR                                 |
| P05164-3 | P0DTC2-1037 | ?DQLTP     | VSNEIVRFPTDQLTPD | HADQLTPWVRVY                                 |
| P05164-3 | P0DTC2-1045 | ?DQLTP     | VSNEIVRFPTDQLTPD | IHADQLTPWVRV                                 |
| P05164-3 | P0DTC2-1046 | ?DQLTP     | VSNEIVRFPTDQLTPD | IHADQLTPWVRVYSTGSN                           |
| P05164-3 | P0DTC2-1098 | V????DQLTP | VSNEIVRFPTDQLTPD | PVAIHADQLTP                                  |
| P05164-3 | P0DTC2-1100 | V????DQLTP | VSNEIVRFPTDQLTPD | QDVNCTEVPVAIHADQLTP                          |
| P05164-3 | P0DTC2-1109 | V????DQLTP | VSNEIVRFPTDQLTPD | QVAVLYQDVNCTEVPVAIHADQLTPTW                  |

|           |             |              |                             |                                        |
|-----------|-------------|--------------|-----------------------------|----------------------------------------|
| P05164-3  | P0DTC2-1171 | ???IVRFP     | VSNEIVRFPTDQLTPD            | YQTSNFRVQPTESIVRFPN                    |
| P05164-3  | P0DTC2-1250 | ???IVRFP     | VSNEIVRFPTDQLTPD            | SNFRVQPTESIVRFPNITNL                   |
| P05164-3  | P0DTC2-1257 | ???IVRFP     | VSNEIVRFPTDQLTPD            | TESIVRFPNITNLCP                        |
| P06733-17 | P0DTD1-638  | ADLYK        | PSRYISPDQLADLYKSFID         | ITEHSWNADLYKLM                         |
| P06733-17 | P0DTD1-909  | ADLYK        | PSRYISPDQLADLYKSFID         | HSWNADLYKLMGHFA                        |
| P06733-17 | P0DTD1-1287 | ADLYK        | PSRYISPDQLADLYKSFID         | WNADLYKLMGHFAWW                        |
| P18669-5  | P0DTC1-235  | ???GKAKK     | VRKAMEAVAAQGKAKK            | CGNFKVTKGKAKKGA                        |
| P18669-5  | P0DTC1-375  | ???GKAKK     | VRKAMEAVAAQGKAKK            | ESCGNFKVTKGKAKK                        |
| P01042-10 | P0DTC1-102  | AVDAA        | DKDLFKAVDAALKKY             | LSFCAFAVDAAKAY                         |
| P01042-11 | P0DTC1-102  | AVDAA        | DLFKAVDAALKKYN              | LSFCAFAVDAAKAY                         |
| P05783-35 | P0DTC9-332  | G???AS??SSRS | FGGPGTASRPSSRSYVTTSTRT<br>Y | LPQGTTLPKGFYAEGSRGGSQASSRSSRSRNSSRNSTP |
| P05783-35 | P0DTC9-441  | AS??SSRS     | FGGPGTASRPSSRSYVTTSTRT<br>Y | ASSRSSRSRNSSRN                         |
| P05783-35 | P0DTC9-454  | G???AS??SSRS | FGGPGTASRPSSRSYVTTSTRT<br>Y | GGSQASSRSSRSRN                         |
| P05783-35 | P0DTC9-501  | G???AS??SSRS | FGGPGTASRPSSRSYVTTSTRT<br>Y | SRGGSQASSRSSRS                         |
| P05783-35 | P0DTC9-502  | SSRS         | FGGPGTASRPSSRSYVTTSTRT<br>Y | SRSSRSRNSSRNST                         |
| P01042-12 | P0DTC1-102  | AVDAA        | KDLFKAVDAALKKY              | LSFCAFAVDAAKAY                         |
| P62851-2  | P0DTD1-821  | ???LLSKG     | KIRGSLARAALQELLSKGLIKL      | EGQINDMILSLLSKG                        |
| P62851-2  | P0DTD1-1016 | LLSKG        | KIRGSLARAALQELLSKGLIKL      | LLSKGRLIIRENNRV                        |
| P62851-2  | P0DTD1-1032 | ?LLSKG       | KIRGSLARAALQELLSKGLIKL      | LSLLSKGRLIIRENN                        |
| P62851-2  | P0DTD1-1052 | ???LLSKG     | KIRGSLARAALQELLSKGLIKL      | MILSLLSKGRLIIRE                        |
| P62851-4  | P0DTD1-821  | ???LLSKG     | LKIRGSLARAALQELLSKGLIKL     | EGQINDMILSLLSKG                        |
| P62851-4  | P0DTD1-1016 | LLSKG        | LKIRGSLARAALQELLSKGLIKL     | LLSKGRLIIRENNRV                        |
| P62851-4  | P0DTD1-1032 | ?LLSKG       | LKIRGSLARAALQELLSKGLIKL     | LSLLSKGRLIIRENN                        |
| P62851-4  | P0DTD1-1052 | ???LLSKG     | LKIRGSLARAALQELLSKGLIKL     | MILSLLSKGRLIIRE                        |
| Q9UHN6-1  | P0DTD1-1078 | ???G?YTFEK   | LPFGSYTFEKDFSRL             | NSKVQIGEYTFEKGD                        |
| Q9UHN6-1  | P0DTD1-1115 | ?G?YTFEK     | LPFGSYTFEKDFSRL             | QIGEYTFEKGDYGD                         |
| Q9UHN6-1  | P0DTD1-1310 | YTFEK        | LPFGSYTFEKDFSRL             | YTFEKGDYGDVYR                          |
| P01042-13 | P0DTC1-102  | AVDAA        | NDKDLFKAVDAALKKY            | LSFCAFAVDAAKAY                         |

|           |             |        |                               |                   |
|-----------|-------------|--------|-------------------------------|-------------------|
| P01042-14 | P0DTC1-102  | AVDAA  | NDKDLFKAVDAALKKYNS            | LSFCAFAVDAAKAY    |
| Q96PV4    | P0DTD1-1145 | KAVFI  | LCAYRVLGRMFRREDNAKAVFI<br>EL  | RNPAWRKAVFISPYN   |
| Q96PV4    | P0DTD1-1289 | KAVFI  | LCAYRVLGRMFRREDNAKAVFI<br>EL  | WRKAVFISPYN SQNA  |
| P47914-4  | P0DTD1-819  | KPRSQ  | RNGIKKPRSQRY                  | EFKPRSQMEIDFLEL   |
| P47914-4  | P0DTD1-969  | KPRSQ  | RNGIKKPRSQRY                  | KPRSQMEIDFLELAM   |
| P47914-4  | P0DTD1-1023 | KPRSQ  | RNGIKKPRSQRY                  | LQEFKPRSQMEIDFL   |
| P47914-4  | P0DTD1-1127 | KPRSQ  | RNGIKKPRSQRY                  | QSRNLQEFKPRSQME   |
| P47914-4  | P0DTD1-1144 | KPRSQ  | RNGIKKPRSQRY                  | RNLQEFKPRSQMEID   |
| P07355-8  | P0DTD1-801  | RDLYD  | AEDGSVIDYELIDQDARDLYDA        | DRDLYDKLQFTSLEI   |
| P07355-8  | P0DTD1-928  | RDLYD  | AEDGSVIDYELIDQDARDLYDA        | ILCIMSDRDLYDKLQ   |
| Q7Z4T9    | P0DTD1-386  | VYSFL  | AELVYSFLIPEVQKYFVKEKVRN<br>AQ | PVYSFLPGVYSVIYL   |
| Q7Z4T9    | P0DTD1-833  | ?KYFVK | AELVYSFLIPEVQKYFVKEKVRN<br>AQ | ELTSMKYFVKIGPER   |
| Q8N729    | P0DTC9-145  | LALLL  | APASRPRLALLLLLLLLPLP          | RMAGNGGDAA LALLL  |
| Q8N729    | P0DTC9-225  | ALLLL  | APASRPRLALLLLLLLLPLP          | ALLLLDRLNQLESKMS  |
| Q8N729    | P0DTC9-228  | LALLL  | APASRPRLALLLLLLLLPLP          | ARMAGNGGDAA LALLL |
| Q8N729    | P0DTC9-363  | ALLLL  | APASRPRLALLLLLLLLPLP          | ALLLLDRLNQLESKMSG |
| Q8N729    | P0DTC9-439  | ALLLL  | APASRPRLALLLLLLLLPLP          | ALLLLDRLNQLESKM   |
| Q6H3X3    | P0DTC3-4    | RATAT  | AQPRATAT                      | FVRATATIP         |
| Q6H3X3    | P0DTC3-81   | RATAT  | AQPRATAT                      | KDATPSDFVRATATIP  |
| Q6H3X3    | P0DTC3-94   | RATAT  | AQPRATAT                      | ATPSDFVRATAT      |
| Q6H3X3    | P0DTC3-103  | RATAT  | AQPRATAT                      | PSDFVRATATIP      |
| Q6H3X3    | P0DTC3-108  | RATAT  | AQPRATAT                      | VRATATIP IQAS     |
| Q6H3X3    | P0DTC3-114  | RATAT  | AQPRATAT                      | ATPSDFVRATATIP    |
| O95450    | P0DTC9-16   | ALLLL  | ARRLLCPALLLLLLLLP             | LALLLLDRL         |
| O95450    | P0DTC9-225  | ALLLL  | ARRLLCPALLLLLLLLP             | ALLLLDRLNQLESKMS  |
| O95450    | P0DTC9-262  | ALLLL  | ARRLLCPALLLLLLLLP             | LALLLLDRLNQLESKM  |
| O95450    | P0DTC9-363  | ALLLL  | ARRLLCPALLLLLLLLP             | ALLLLDRLNQLESKMSG |
| O95450    | P0DTC9-439  | ALLLL  | ARRLLCPALLLLLLLLP             | ALLLLDRLNQLESKM   |

|        |            |        |                              |                                                    |
|--------|------------|--------|------------------------------|----------------------------------------------------|
| O75486 | P0DTC9-15  | ?KDKKK | ARVITPEDLLFLMRKDKKKLRRL<br>L | KTFPPTPEPKDKKKK                                    |
| O75486 | P0DTC9-35  | ?KDKKK | ARVITPEDLLFLMRKDKKKLRRL<br>L | YKTFPPTPEPKDKKK                                    |
| O75486 | P0DTC9-59  | ?KDKKK | ARVITPEDLLFLMRKDKKKLRRL<br>L | KDKKKKADETQALPQRQ                                  |
| O75486 | P0DTC9-61  | ?KDKKK | ARVITPEDLLFLMRKDKKKLRRL<br>L | KTFPPTPEPKDKKKKADE                                 |
| O75486 | P0DTC9-87  | ?KDKKK | ARVITPEDLLFLMRKDKKKLRRL<br>L | TEPKDKKKKADETQ                                     |
| O75486 | P0DTC9-109 | ?KDKKK | ARVITPEDLLFLMRKDKKKLRRL<br>L | DAYKTFPPTPEPKDKKKKADETQA                           |
| O75486 | P0DTC9-110 | ?KDKKK | ARVITPEDLLFLMRKDKKKLRRL<br>L | FPPTPEPKDKKKKADETQALPQRQKKQQTVTLLPAADL<br>DDFSKQLQ |
| O75486 | P0DTC9-170 | ?KDKKK | ARVITPEDLLFLMRKDKKKLRRL<br>L | KTFPPTPEPKDKKK                                     |
| O75486 | P0DTC9-330 | ?KDKKK | ARVITPEDLLFLMRKDKKKLRRL<br>L | DKDPNFKDQVILLNKHIDAYKTFPPTPEPKDKKKKADET            |
| O75486 | P0DTC9-346 | ?KDKKK | ARVITPEDLLFLMRKDKKKLRRL<br>L | KHIDAYKTFPPTPEPKDKKKK                              |
| O75486 | P0DTC9-351 | ?KDKKK | ARVITPEDLLFLMRKDKKKLRRL<br>L | PKDKKKKTDEAQPLPQRQKKQP                             |
| O75486 | P0DTC9-366 | ?KDKKK | ARVITPEDLLFLMRKDKKKLRRL<br>L | AYKTFPPTPEPKDKKKK                                  |
| O75486 | P0DTC9-387 | KDKKK  | ARVITPEDLLFLMRKDKKKLRRL<br>L | KDKKKKADETQALPQR                                   |
| O75486 | P0DTC9-388 | ?KDKKK | ARVITPEDLLFLMRKDKKKLRRL<br>L | KDKKKKADETQ                                        |
| O75486 | P0DTC9-467 | KDKKK  | ARVITPEDLLFLMRKDKKKLRRL<br>L | KDKKKKADETQALPQ                                    |
| O75486 | P0DTC9-485 | ?KDKKK | ARVITPEDLLFLMRKDKKKLRRL<br>L | PKDKKKKADETQAL                                     |
| O75486 | P0DTC9-487 | ?KDKKK | ARVITPEDLLFLMRKDKKKLRRL<br>L | PPTEPKDKKKKADE                                     |



|        |            |        |                              |                         |
|--------|------------|--------|------------------------------|-------------------------|
| O75486 | P0DTC9-503 | ?KDKKK | ARVITPEDLLFLMRKDKKKLRRL<br>L | TFPTEPKDKKKKA           |
| O75486 | P0DTC2-8   | EDLLF  | ARVITPEDLLFLMRKDKKKLRRL<br>L | EDLLFNKVTADAGF          |
| O75486 | P0DTC2-76  | EDLLF  | ARVITPEDLLFLMRKDKKKLRRL<br>L | KPSKRSFIEDLLFNK         |
| O75486 | P0DTC2-90  | EDLLF  | ARVITPEDLLFLMRKDKKKLRRL<br>L | PSKPSKRSFIEDLLFNKV      |
| O75486 | P0DTC2-247 | EDLLF  | ARVITPEDLLFLMRKDKKKLRRL<br>L | LPDPSKPSKRSFIEDLLFNK    |
| O75486 | P0DTC2-276 | EDLLF  | ARVITPEDLLFLMRKDKKKLRRL<br>L | SFIEDLLFNKVTADAGFIK     |
| O75486 | P0DTC2-388 | EDLLF  | ARVITPEDLLFLMRKDKKKLRRL<br>L | SFIEDLLFNKVTAD          |
| O75486 | P0DTC2-448 | EDLLF  | ARVITPEDLLFLMRKDKKKLRRL<br>L | PDPSKPSKRSFIEDLLFNKVTAD |
| O75486 | P0DTC2-453 | EDLLF  | ARVITPEDLLFLMRKDKKKLRRL<br>L | RSFIEDLLFNK             |
| O75486 | P0DTC2-454 | EDLLF  | ARVITPEDLLFLMRKDKKKLRRL<br>L | RSFIEDLLFNKV            |
| O75486 | P0DTC2-532 | EDLLF  | ARVITPEDLLFLMRKDKKKLRRL<br>L | PSKPSKRSFIEDLLF         |
| O75486 | P0DTC2-543 | EDLLF  | ARVITPEDLLFLMRKDKKKLRRL<br>L | SKRSFIEDLLFNKVT         |
| O75486 | P0DTC2-707 | EDLLF  | ARVITPEDLLFLMRKDKKKLRRL<br>L | RSFIEDLLFNKVTLA         |
| O75486 | P0DTC2-720 | EDLLF  | ARVITPEDLLFLMRKDKKKLRRL<br>L | EDLLFN                  |
| O75486 | P0DTC2-759 | EDLLF  | ARVITPEDLLFLMRKDKKKLRRL<br>L | SKRSFIEDLLF             |
| O75486 | P0DTC2-764 | EDLLF  | ARVITPEDLLFLMRKDKKKLRRL<br>L | SKRSFIEDLLFNKVTLA       |
| O75486 | P0DTC2-785 | EDLLF  | ARVITPEDLLFLMRKDKKKLRRL<br>L | DPSKPSKRSFIEDLLF        |

|        |             |              |                                       |                                                 |
|--------|-------------|--------------|---------------------------------------|-------------------------------------------------|
| O75486 | P0DTC2-799  | EDLLF        | ARVITP <b>EDLLF</b> LMRKDKKKLRRL<br>L | F <b>EDLLF</b> NKVTLADAG                        |
| O75486 | P0DTC2-835  | EDLLF        | ARVITP <b>EDLLF</b> LMRKDKKKLRRL<br>L | KPSKRSF <b>EDLLF</b> NKV                        |
| O75486 | P0DTC2-837  | EDLLF        | ARVITP <b>EDLLF</b> LMRKDKKKLRRL<br>L | KRSF <b>EDLLF</b> NKVTLA                        |
| O75486 | P0DTC2-852  | EDLLF        | ARVITP <b>EDLLF</b> LMRKDKKKLRRL<br>L | PDPSKPSKRSF <b>EDLLF</b> NKVTLADAG              |
| O75486 | P0DTC2-860  | EDLLF        | ARVITP <b>EDLLF</b> LMRKDKKKLRRL<br>L | PSKPSKRSF <b>EDLLF</b> N                        |
| O75486 | P0DTC2-861  | EDLLF        | ARVITP <b>EDLLF</b> LMRKDKKKLRRL<br>L | PSKRSF <b>EDLLF</b> NKVT                        |
| O75486 | P0DTC2-875  | EDLLF        | ARVITP <b>EDLLF</b> LMRKDKKKLRRL<br>L | RSF <b>EDLLF</b> NKVTLAD                        |
| O75486 | P0DTC2-880  | EDLLF        | ARVITP <b>EDLLF</b> LMRKDKKKLRRL<br>L | SF <b>EDLLF</b> NKVTLADA                        |
| O75486 | P0DTC2-883  | EDLLF        | ARVITP <b>EDLLF</b> LMRKDKKKLRRL<br>L | SKPSKRSF <b>EDLLF</b> NK                        |
| O75486 | P0DTC2-884  | EDLLF        | ARVITP <b>EDLLF</b> LMRKDKKKLRRL<br>L | SKRSF <b>EDLLF</b> NKVTL                        |
| O75486 | P0DTC2-934  | EDLLF        | ARVITP <b>EDLLF</b> LMRKDKKKLRRL<br>L | NFSQILPDPSKPSKRSF <b>EDLLF</b> NKVTLADAGFIKQYGD |
| O75486 | P0DTC2-983  | EDLLF        | ARVITP <b>EDLLF</b> LMRKDKKKLRRL<br>L | SKPSKRSF <b>EDLLF</b>                           |
| O75486 | P0DTC2-1053 | EDLLF        | ARVITP <b>EDLLF</b> LMRKDKKKLRRL<br>L | KRSF <b>EDLLF</b> NKVT                          |
| O75486 | P0DTC2-1124 | EDLLF        | ARVITP <b>EDLLF</b> LMRKDKKKLRRL<br>L | SKRSF <b>EDLLF</b> NKVTLADA                     |
| O75486 | P0DTC1-517  | ?V?????LLFLM | ARVITP <b>EDLLF</b> LMRKDKKKLRRL<br>L | HVVAFNT <b>LLFLM</b> SFT                        |
| O75486 | P0DTC1-1151 | LLFLM        | ARVITP <b>EDLLF</b> LMRKDKKKLRRL<br>L | VAFNT <b>LLFLM</b> SFTVL                        |
| Q8MH48 | P0DTC1-607  | KDYLA        | AYDG <b>KDYLA</b> LNEDLRSWTA          | KAY <b>KDYLA</b> SGGQPIT                        |
| Q8MH48 | P0DTC1-1267 | KDYLA        | AYDG <b>KDYLA</b> LNEDLRSWTA          | Y <b>KDYLA</b> SGGQPITNC                        |

|          |             |                 |                                      |                                               |
|----------|-------------|-----------------|--------------------------------------|-----------------------------------------------|
| Q8NAP8   | P0DTD1-220  | VTDTTP          | CDSCTC <b>VTDTTP</b> DDDDDLDM        | <b>VTDTTP</b> KGPK                            |
| Q8NAP8   | P0DTC1-15   | C??VTDTTP       | CDSCTC <b>VTDTTP</b> DDDDDLDM        | PCR <b>FVTDTTP</b> KGPKVK                     |
| Q8NAP8   | P0DTC1-116  | C??VTDTTP       | CDSCTC <b>VTDTTP</b> DDDDDLDM        | PPCR <b>FVTDTTP</b> KGPK                      |
| Q8NAP8   | P0DTC1-356  | C??VTDTTP       | CDSCTC <b>VTDTTP</b> DDDDDLDM        | ELEPPCR <b>FVTDTTP</b> KG                     |
| Q8N446   | P0DTC2-52   | C???CCSCG       | CPFC <b>CCSCG</b> D                  | CLKG <b>CCSCG</b> SCCKFD                      |
| Q8N446   | P0DTC2-216  | C???CCSCG       | CPFC <b>CCSCG</b> D                  | CMTSCCCLKG <b>CCSCG</b> SCCK                  |
| Q8N446   | P0DTC2-230  | CCSCG           | CPFC <b>CCSCG</b> D                  | G <b>CCSCG</b> SCCKFDEDDSEPV                  |
| Q8N446   | P0DTC2-433  | CCSCG           | CPFC <b>CCSCG</b> D                  | <b>CCSCG</b> SCCKFDEDDSEPVKGVL                |
| Q8N446   | P0DTC2-498  | CCSCG           | CPFC <b>CCSCG</b> D                  | KG <b>CCSCG</b> SCCKFDED                      |
| Q8N446   | P0DTC2-771  | CCSCG           | CPFC <b>CCSCG</b> D                  | <b>CCSCG</b> SCCKFDEDDSE                      |
| Q8N446   | P0DTC2-772  | CCSCG           | CPFC <b>CCSCG</b> D                  | <b>CCSCG</b> SCCKFDEDDSEPVKGVLHYT             |
| Q8N446   | P0DTC2-924  | C???CCSCG       | CPFC <b>CCSCG</b> D                  | CCMTSCCCLKG <b>CCSCG</b> SCCKFDEDDSEPVKGVLHYT |
| Q8N446   | P0DTC2-1179 | CCSCG           | CPFC <b>CCSCG</b> D                  | <b>CCSCG</b> SCCKFDEDDSE                      |
| Q9HCE3   | P0DTC1-163  | KLKAL           | DYD <b>KLKAL</b> GGEN                | ADSIIGGAK <b>KLKAL</b> N                      |
| P07355-9 | P0DTD1-801  | RDLYD           | EDGSVIDYELIDQDARD <b>LDYDA</b>       | D <b>RDLYD</b> KLQFTSLEI                      |
| P07355-9 | P0DTD1-928  | RDLYD           | EDGSVIDYELIDQDARD <b>LDYDA</b>       | ILCIMS <b>D</b> RDLYD <b>KLQ</b>              |
| Q92688-1 | P0DTD1-132  | D?EEEEF?        | EEDEDEDG <b>EEEEF</b> DEEDEDE<br>DVE | GDC <b>EEEEF</b> EPSTQY                       |
| Q92688-1 | P0DTD1-612  | EEEEF?          | EEDEDEDG <b>EEEEF</b> DEEDEDE<br>DVE | <b>EEEEF</b> EPSTQY                           |
| Q92688-1 | P0DTC1-234  | EEEEF?          | EEDEDEDG <b>EEEEF</b> DEEDEDE<br>DVE | <b>CEEEEEF</b> EPSTQYEG                       |
| Q92688-1 | P0DTC1-261  | ?EDE???D?EEEEF? | EEDEDEDG <b>EEEEF</b> DEEDEDE<br>DVE | DEDEEEGD <b>CEEEEEF</b>                       |
| Q92688-1 | P0DTC1-262  | DE???D?EEEEF?   | EEDEDEDG <b>EEEEF</b> DEEDEDE<br>DVE | DEEEGD <b>CEEEEEF</b> EPS                     |
| Q92688-1 | P0DTC1-327  | ???D?EEEEF?     | EEDEDEDG <b>EEEEF</b> DEEDEDE<br>DVE | EEGD <b>CEEEEEF</b> EPSTQ                     |
| Q92688-1 | P0DTC1-453  | D?EEEEF?        | EEDEDEDG <b>EEEEF</b> DEEDEDE<br>DVE | GDC <b>EEEEF</b> EPSTQY                       |
| Q9NW61   | P0DTC2-76   | SFIED           | EEPGTFS <b>SFIED</b> PERKYH          | KPSKR <b>SFIED</b> LLFNK                      |
| Q9NW61   | P0DTC2-90   | SFIED           | EEPGTFS <b>SFIED</b> PERKYH          | PSKPSKR <b>SFIED</b> LLFNKV                   |

|        |             |         |                     |                                         |
|--------|-------------|---------|---------------------|-----------------------------------------|
| Q9NW61 | P0DTC2-247  | SFIED   | EEPGTFSISFIEDPERKYH | LPDPSKPSKRSFIEDLLFNK                    |
| Q9NW61 | P0DTC2-276  | SFIED   | EEPGTFSISFIEDPERKYH | SFIEDLLFNKVTLADAGFIK                    |
| Q9NW61 | P0DTC2-357  | SFIED   | EEPGTFSISFIEDPERKYH | LPDPSKPSKRSFIED                         |
| Q9NW61 | P0DTC2-388  | SFIED   | EEPGTFSISFIEDPERKYH | SFIEDLLFNKVTLAD                         |
| Q9NW61 | P0DTC2-448  | SFIED   | EEPGTFSISFIEDPERKYH | PDPSKPSKRSFIEDLLFNKVTLAD                |
| Q9NW61 | P0DTC2-453  | SFIED   | EEPGTFSISFIEDPERKYH | RSFIEDLLFNK                             |
| Q9NW61 | P0DTC2-454  | SFIED   | EEPGTFSISFIEDPERKYH | RSFIEDLLFNKV                            |
| Q9NW61 | P0DTC2-532  | SFIED   | EEPGTFSISFIEDPERKYH | PSKPSKRSFIEDLLF                         |
| Q9NW61 | P0DTC2-543  | SFIED   | EEPGTFSISFIEDPERKYH | SKRSFIEDLLFNKVT                         |
| Q9NW61 | P0DTC2-707  | SFIED   | EEPGTFSISFIEDPERKYH | RSFIEDLLFNKVTLA                         |
| Q9NW61 | P0DTC2-759  | SFIED   | EEPGTFSISFIEDPERKYH | SKRSFIEDLLF                             |
| Q9NW61 | P0DTC2-764  | SFIED   | EEPGTFSISFIEDPERKYH | SKRSFIEDLLFNKVTLA                       |
| Q9NW61 | P0DTC2-785  | SFIED   | EEPGTFSISFIEDPERKYH | DPSKPSKRSFIEDLLF                        |
| Q9NW61 | P0DTC2-826  | SFIED   | EEPGTFSISFIEDPERKYH | ILPDPSKPSKRSFIED                        |
| Q9NW61 | P0DTC2-835  | SFIED   | EEPGTFSISFIEDPERKYH | KPSKRSFIEDLLFNKV                        |
| Q9NW61 | P0DTC2-837  | SFIED   | EEPGTFSISFIEDPERKYH | KRSFIEDLLFNKVTLA                        |
| Q9NW61 | P0DTC2-851  | SFIED   | EEPGTFSISFIEDPERKYH | PDPSKPSKRSFIEDLL                        |
| Q9NW61 | P0DTC2-852  | SFIED   | EEPGTFSISFIEDPERKYH | PDPSKPSKRSFIEDLLFNKVTLADAG              |
| Q9NW61 | P0DTC2-860  | SFIED   | EEPGTFSISFIEDPERKYH | PSKPSKRSFIEDLLFN                        |
| Q9NW61 | P0DTC2-861  | SFIED   | EEPGTFSISFIEDPERKYH | PSKRSFIEDLLFNKVT                        |
| Q9NW61 | P0DTC2-867  | SFIED   | EEPGTFSISFIEDPERKYH | QILPDPSKPSKRSFIED                       |
| Q9NW61 | P0DTC2-875  | SFIED   | EEPGTFSISFIEDPERKYH | RSFIEDLLFNKVTLAD                        |
| Q9NW61 | P0DTC2-880  | SFIED   | EEPGTFSISFIEDPERKYH | SFIEDLLFNKVTLADA                        |
| Q9NW61 | P0DTC2-883  | SFIED   | EEPGTFSISFIEDPERKYH | SKPSKRSFIEDLLFNK                        |
| Q9NW61 | P0DTC2-884  | SFIED   | EEPGTFSISFIEDPERKYH | SKRSFIEDLLFNKVTL                        |
| Q9NW61 | P0DTC2-934  | SFIED   | EEPGTFSISFIEDPERKYH | NFSQILPDPSKPSKRSFIEDLLFNKVTLADAGFIKQYGD |
| Q9NW61 | P0DTC2-983  | SFIED   | EEPGTFSISFIEDPERKYH | SKPSKRSFIEDLLF                          |
| Q9NW61 | P0DTC2-1053 | SFIED   | EEPGTFSISFIEDPERKYH | KRSFIEDLLFNKVT                          |
| Q9NW61 | P0DTC2-1124 | SFIED   | EEPGTFSISFIEDPERKYH | SKRSFIEDLLFNKVTLADA                     |
| Q9NW61 | P0DTC2-1232 | SFIED   | EEPGTFSISFIEDPERKYH | PDPSKPSKRSFIEDL                         |
| P0C7M7 | P0DTD1-440  | VSSPD?? | ESAVVSSPDQIRGEVVK   | VSSPDAVTAY                              |
| P0C7M7 | P0DTC1-98   | VSSPD   | ESAVVSSPDQIRGEVVK   | LKVPATVSVSSPDA                          |
| P0C7M7 | P0DTC1-888  | VSSPD?? | ESAVVSSPDQIRGEVVK   | PATVSVSSPDAVTAY                         |

|        |             |         |                   |                                             |
|--------|-------------|---------|-------------------|---------------------------------------------|
| P0C7M7 | P0DTC1-1043 | VSSPD?? | ESAVVSSPDQIRGEVVK | SVSSPD AVTAYNGYL                            |
| P32246 | P0DTC1-941  | RARTV   | FALRARTVTFG       | ISAKNRARTVAGVSI                             |
| Q96GD3 | P0DTC9-16   | ALLLL   | GKALLLLRSDMMMKEYM | LALLLLDRL                                   |
| Q96GD3 | P0DTC9-42   | ALLLL   | GKALLLLRSDMMMKEYM | GDAALALLLLDRLNQL                            |
| Q96GD3 | P0DTC9-93   | ALLLL   | GKALLLLRSDMMMKEYM | DAALALLLLDRLNQL                             |
| Q96GD3 | P0DTC9-118  | ALLLL   | GKALLLLRSDMMMKEYM | PARMAGNGGDAALALLLLDRLNQLESKMSGKGQQQ<br>QQQ  |
| Q96GD3 | P0DTC9-120  | ALLLL   | GKALLLLRSDMMMKEYM | AALALLLLDRLNQLE                             |
| Q96GD3 | P0DTC9-157  | ALLLL   | GKALLLLRSDMMMKEYM | AGNGGDAALALLLLD                             |
| Q96GD3 | P0DTC9-216  | ALLLL   | GKALLLLRSDMMMKEYM | AALALLLLDRLNQLES                            |
| Q96GD3 | P0DTC9-221  | ALLLL   | GKALLLLRSDMMMKEYM | AGNGGDAALALLLLDR                            |
| Q96GD3 | P0DTC9-224  | ALLLL   | GKALLLLRSDMMMKEYM | ALALLLLDRLNQLESK                            |
| Q96GD3 | P0DTC9-225  | ALLLL   | GKALLLLRSDMMMKEYM | ALLLLDRLNQLESKMS                            |
| Q96GD3 | P0DTC9-229  | ALLLL   | GKALLLLRSDMMMKEYM | ARMAGNGGDAALALLLLDRLNQLESKMSGKG             |
| Q96GD3 | P0DTC9-231  | ALLLL   | GKALLLLRSDMMMKEYM | DAALALLLLDRLNQLE                            |
| Q96GD3 | P0DTC9-245  | ALLLL   | GKALLLLRSDMMMKEYM | GGDAALALLLLDRLNQ                            |
| Q96GD3 | P0DTC9-249  | ALLLL   | GKALLLLRSDMMMKEYM | GNGGDAALALLLLDRL                            |
| Q96GD3 | P0DTC9-262  | ALLLL   | GKALLLLRSDMMMKEYM | LALLLLDRLNQLESKM                            |
| Q96GD3 | P0DTC9-277  | ALLLL   | GKALLLLRSDMMMKEYM | MAGNGGDAALALLLLD                            |
| Q96GD3 | P0DTC9-282  | ALLLL   | GKALLLLRSDMMMKEYM | NGGDAALALLLLDRLN                            |
| Q96GD3 | P0DTC9-313  | ALLLL   | GKALLLLRSDMMMKEYM | RMAGNGGDAALALLLL                            |
| Q96GD3 | P0DTC9-339  | ALLLL   | GKALLLLRSDMMMKEYM | SSRGTSPARMAGNGGDAALALLLLDRLNQLESKMSGK<br>GQ |
| Q96GD3 | P0DTC9-359  | ALLLL   | GKALLLLRSDMMMKEYM | AALALLLLDRLNQLESKMS                         |
| Q96GD3 | P0DTC9-363  | ALLLL   | GKALLLLRSDMMMKEYM | ALLLLDRLNQLESKMSG                           |
| Q96GD3 | P0DTC9-394  | ALLLL   | GKALLLLRSDMMMKEYM | MAGNGGDAALALLLLDR                           |
| Q96GD3 | P0DTC9-417  | ALLLL   | GKALLLLRSDMMMKEYM | RMAGNGGDAALALLLLDRL                         |
| Q96GD3 | P0DTC9-438  | ALLLL   | GKALLLLRSDMMMKEYM | ALALLLLDRLNQLES                             |
| Q96GD3 | P0DTC9-439  | ALLLL   | GKALLLLRSDMMMKEYM | ALLLLDRLNQLESKM                             |
| Q96GD3 | P0DTC9-453  | ALLLL   | GKALLLLRSDMMMKEYM | GGDAALALLLLDRLN                             |
| Q96GD3 | P0DTC9-456  | ALLLL   | GKALLLLRSDMMMKEYM | GNGGDAALALLLLDR                             |
| Q96GD3 | P0DTC9-480  | ALLLL   | GKALLLLRSDMMMKEYM | MAGNGGDAALALLLL                             |

|           |            |          |                                  |                                                          |
|-----------|------------|----------|----------------------------------|----------------------------------------------------------|
| P82914    | P0DTC9-55  | YYRRA?RR | GLGIEYTFPPLYYRRAHRRFVTK<br>K     | YYRRA <sup>TRRIR</sup>                                   |
| P82914    | P0DTC9-65  | YYRRA?RR | GLGIEYTFPPLYYRRAHRRFVTK<br>K     | DDQIGYYRRA <sup>TRRIR</sup>                              |
| P82914    | P0DTC9-74  | YYRRA?RR | GLGIEYTFPPLYYRRAHRRFVTK<br>K     | DQIGYYRRA <sup>TRRIR</sup>                               |
| P82914    | P0DTC9-97  | YYRRA?RR | GLGIEYTFPPLYYRRAHRRFVTK<br>K     | IGYYRRA <sup>TRRIRGGD</sup>                              |
| P82914    | P0DTC9-137 | YYRRA    | GLGIEYTFPPLYYRRAHRRFVTK<br>K     | NSSPDDQIGYYRRA <sup>T</sup>                              |
| P82914    | P0DTC9-188 | YYRRA?RR | GLGIEYTFPPLYYRRAHRRFVTK<br>K     | YYRRA <sup>TRRIRGGDGK</sup>                              |
| P82914    | P0DTC9-368 | YYRRA?RR | GLGIEYTFPPLYYRRAHRRFVTK<br>K     | DDQIGYYRRA <sup>TRRIRGGDG</sup>                          |
| P82914    | P0DTC9-424 | YYRRA    | GLGIEYTFPPLYYRRAHRRFVTK<br>K     | SPDDQIGYYRRA <sup></sup>                                 |
| P82914    | P0DTC9-484 | YYRRA?RR | GLGIEYTFPPLYYRRAHRRFVTK<br>K     | PDDQIGYYRRA <sup>TRRI</sup>                              |
| P07355-12 | P0DTD1-801 | RDLYD    | GSVIDYELIDQDARDLYDAGVK<br>RKG    | D <sup>RDLYD</sup> KLQFTSLEI                             |
| P07355-12 | P0DTD1-928 | RDLYD    | GSVIDYELIDQDARDLYDAGVK<br>RKG    | ILCIMS <sup>D</sup> RDLYDKLQ                             |
| Q6V0I7    | P0DTC2-64  | ?LTGTG?? | ITATDSGSPAL <sup>TGTG</sup> TINV | FNFNGL <sup>TGTG</sup> VLTES                             |
| Q6V0I7    | P0DTC2-251 | ?LTGTG?? | ITATDSGSPAL <sup>TGTG</sup> TINV | NGL <sup>TGTG</sup> VLTESNKKFLPFQ                        |
| Q6V0I7    | P0DTC2-291 | ?LTGTG?? | ITATDSGSPAL <sup>TGTG</sup> TINV | VKNKCVNFNFNGL <sup>TGTG</sup> VLT                        |
| Q6V0I7    | P0DTC2-364 | LTGTG??  | ITATDSGSPAL <sup>TGTG</sup> TINV | <sup>LTGTG</sup> VLTESNKKFL                              |
| Q6V0I7    | P0DTC2-482 | ?LTGTG?? | ITATDSGSPAL <sup>TGTG</sup> TINV | GL <sup>TGTG</sup> VLTESNKKF                             |
| Q6V0I7    | P0DTC2-803 | ?LTGTG?? | ITATDSGSPAL <sup>TGTG</sup> TINV | FNFNGL <sup>TGTG</sup> VLTESN                            |
| Q6V0I7    | P0DTC2-828 | ?LTGTG?? | ITATDSGSPAL <sup>TGTG</sup> TINV | KCVNFNFNGL <sup>TGTG</sup> VL                            |
| Q6V0I7    | P0DTC2-847 | ?LTGTG   | ITATDSGSPAL <sup>TGTG</sup> TINV | NKCVNFNFNGL <sup>TGTG</sup> V                            |
| Q6V0I7    | P0DTC2-848 | ?LTGTG?? | ITATDSGSPAL <sup>TGTG</sup> TINV | NKCVNFNFNGL <sup>TGTG</sup> VL                           |
| Q6V0I7    | P0DTC2-929 | ?LTGTG?? | ITATDSGSPAL <sup>TGTG</sup> TINV | FNFNGL <sup>TGTG</sup> VLTESNKKFLPFQQFGRDIADTTDAVRD<br>P |

|          |             |            |                                       |                                                      |
|----------|-------------|------------|---------------------------------------|------------------------------------------------------|
| Q6V0I7   | P0DTC2-936  | ?LTGTG??   | ITATDSGSPAL <b>LTGTG</b> TINV         | PATVCGPKKSTNLVKNKCVNFNFNG <b>LTGTG</b> VLTESNKK<br>F |
| Q6V0I7   | P0DTC2-966  | ?LTGTG??   | ITATDSGSPAL <b>LTGTG</b> TINV         | <b>GLTGTG</b> VLTESNKKFLPFQQF                        |
| Q6V0I7   | P0DTC1-204  | P???GTGTI  | ITATDSGSPALT <b>GTGT</b> INV          | ARFPKSD <b>GTGT</b> IYTE                             |
| Q6V0I7   | P0DTC1-271  | GTGTI      | ITATDSGSPALT <b>GTGT</b> INV          | <b>DGTGT</b> IYTELEPPCR                              |
| Q6V0I7   | P0DTC1-435  | P???GTGTI  | ITATDSGSPALT <b>GTGT</b> INV          | FPKSD <b>GTGT</b> IYTELE                             |
| Q6V0I7   | P0DTC1-654  | GTGTI      | ITATDSGSPALT <b>GTGT</b> INV          | KSD <b>GTGT</b> IYTELEPP                             |
| P11487   | P0DTD1-408  | ??V??GIVAI | ITAVEV <b>GIVAI</b> RGLFSGRYLAMN<br>K | SIVAG <b>GIVAI</b> VVTCL                             |
| P11487   | P0DTC1-277  | ??V??GIVAI | ITAVEV <b>GIVAI</b> RGLFSGRYLAMN<br>K | DISASIVAG <b>GIVAI</b> V                             |
| P11487   | P0DTC1-465  | GIVAI      | ITAVEV <b>GIVAI</b> RGLFSGRYLAMN<br>K | G <b>GIVAI</b> VVTCLAYYF                             |
| Q9Y6P5   | P0DTD1-398  | SEDAQ      | KEILQVG <b>SEDAQ</b> MH               | <b>SEDAQ</b> GMDNL                                   |
| Q9Y6P5   | P0DTC1-114  | SEDAQ      | KEILQVG <b>SEDAQ</b> MH               | NSFDVLK <b>SEDAQ</b> GMDNL                           |
| Q9Y6P5   | P0DTC1-304  | SEDAQ      | KEILQVG <b>SEDAQ</b> MH               | DVLK <b>SEDAQ</b> GMDNLA                             |
| Q9Y6P5   | P0DTC1-385  | SEDAQ      | KEILQVG <b>SEDAQ</b> MH               | ETSNSFDVLK <b>SEDAQ</b>                              |
| Q9Y6P5   | P0DTC1-717  | SEDAQ      | KEILQVG <b>SEDAQ</b> MH               | LK <b>SEDAQ</b> GMDNLACE                             |
| Q9Y6P5   | P0DTC1-994  | SEDAQ      | KEILQVG <b>SEDAQ</b> MH               | <b>SEDAQ</b> GMDNLACEDL                              |
| Q9Y6P5   | P0DTC1-1004 | SEDAQ      | KEILQVG <b>SEDAQ</b> MH               | SFDVLK <b>SEDAQ</b> GMDN                             |
| Q9NWB7   | P0DTC2-628  | KSNLK      | KLKLLRYEEEF <b>LKSNLK</b> APSRH<br>YF | <b>KSNLK</b> PFER                                    |
| Q6UX71-2 | P0DTC9-34   | VTQAF      | KPGDQILDWQYG <b>VTQAF</b> PHTE<br>E   | <b>VTQAF</b> GRRGPEQTQG                              |
| Q6UX71-2 | P0DTC9-46   | Y?VTQAF    | KPGDQILDWQYG <b>VTQAF</b> PHTE<br>E   | KAYN <b>VTQAF</b>                                    |
| Q6UX71-2 | P0DTC9-67   | Y?VTQAF    | KPGDQILDWQYG <b>VTQAF</b> PHTE<br>E   | KAYN <b>VTQAF</b> GRRGPE                             |
| Q6UX71-2 | P0DTC9-131  | Y?VTQAF    | KPGDQILDWQYG <b>VTQAF</b> PHTE<br>E   | KRTATKAYN <b>VTQAF</b> G                             |
| Q6UX71-2 | P0DTC9-201  | Y?VTQAF    | KPGDQILDWQYG <b>VTQAF</b> PHTE<br>E   | TVTKKSAAEASKKPRQKRTATKAYN <b>VTQAF</b>               |

|               |             |            |                                      |                                                      |
|---------------|-------------|------------|--------------------------------------|------------------------------------------------------|
| Q6UX71-2      | P0DTC9-329  | Y?VTQAF    | KPGDQILDWQYGV <b>VTQAF</b> PHTE<br>E | ATKAYN <b>VTQAF</b> GRRG                             |
| Q6UX71-2      | P0DTC9-336  | Y?VTQAF    | KPGDQILDWQYGV <b>VTQAF</b> PHTE<br>E | QQGQTVTKKSAAEASKKPRQKRTATKAYN <b>VTQAF</b> GRR<br>GP |
| Q6UX71-2      | P0DTC9-389  | Y?VTQAF    | KPGDQILDWQYGV <b>VTQAF</b> PHTE<br>E | KPRQKRTATKAYN <b>VTQAF</b> GRRGPEQTQ                 |
| Q6UX71-2      | P0DTC9-510  | Y?VTQAF    | KPGDQILDWQYGV <b>VTQAF</b> PHTE<br>E | YN <b>VTQAF</b> GRRGPEQT                             |
| Q9NTJ3        | P0DTC2-170  | VEAEV?     | <b>KVEAEV</b> KRLH                   | <b>VEAEV</b> QIDRLITGR                               |
| Q9NTJ3        | P0DTC2-413  | KVEAE      | <b>KVEAEV</b> KRLH                   | VLNDILSRLD <b>KVEAE</b>                              |
| Q8WXH0        | P0DTD1-536  | DTLKE      | LENHVNDIKKPFVIKER <b>DTLKE</b><br>ER | GNC <b>DTLKE</b> ILVTYNC                             |
| Q8WXH0        | P0DTD1-741  | DTLKE      | LENHVNDIKKPFVIKER <b>DTLKE</b><br>ER | ALRHFDEGN <b>CDTLKE</b>                              |
| Q8WXH0        | P0DTD1-806  | DTLKE      | LENHVNDIKKPFVIKER <b>DTLKE</b><br>ER | <b>DTLKE</b> ILVTYNCCDD                              |
| Q8WXH0        | P0DTD1-820  | DTLKE      | LENHVNDIKKPFVIKER <b>DTLKE</b><br>ER | EGNC <b>DTLKE</b> ILVTYN                             |
| Q8WXH0        | P0DTD1-855  | DTLKE      | LENHVNDIKKPFVIKER <b>DTLKE</b><br>ER | FDEGN <b>CDTLKE</b> ILVT                             |
| Q8WXH0        | P0DTD1-1134 | DTLKE      | LENHVNDIKKPFVIKER <b>DTLKE</b><br>ER | RHFDEGN <b>CDTLKE</b> IL                             |
| Q9UHN6-2      | P0DTD1-1078 | ???G?YTFEK | LPFGS <b>YTFEK</b> DFSRG             | NSKVQIG <b>EYTFEK</b> GD                             |
| Q9UHN6-2      | P0DTD1-1115 | ?G?YTFEK   | LPFGS <b>YTFEK</b> DFSRG             | QIG <b>EYTFEK</b> GDYGDA                             |
| Q9UHN6-2      | P0DTD1-1310 | YTFEK      | LPFGS <b>YTFEK</b> DFSRG             | <b>YTFEK</b> GDYGDVAVYR                              |
| A0A0C4DGB6-27 | P0DTD1-22   | LPSLA      | <b>LPSLA</b> ADFVESKD                | FL <b>LPSLA</b> TV                                   |
| A0A0C4DGB6-27 | P0DTD1-131  | LPSLA      | <b>LPSLA</b> ADFVESKD                | FLCLFL <b>LPSLA</b> TV                               |
| A0A0C4DGB6-27 | P0DTD1-493  | LPSLA      | <b>LPSLA</b> ADFVESKD                | LFL <b>LPSLA</b> TV                                  |
| A0A0C4DGB6-27 | P0DTC1-10   | LPSLA      | <b>LPSLA</b> ADFVESKD                | LCLFL <b>LPSLA</b> TVAYF                             |
| A0A0C4DGB6-27 | P0DTC1-728  | LPSLA      | <b>LPSLA</b> ADFVESKD                | <b>LLPSLA</b> TVAYFNMVY                              |
| P48039        | P0DTC1-354  | VLQVR      | <b>LVLQVR</b> QRVKPD RKPKLKP         | EKTHVQLSLP <b>VLQVR</b>                              |
| P48039        | P0DTC1-770  | VLQVR      | <b>LVLQVR</b> QRVKPD RKPKLKP         | LSLP <b>VLQVR</b> DLVLRG                             |
| P48039        | P0DTC1-1091 | VLQVR      | <b>LVLQVR</b> QRVKPD RKPKLKP         | THVQLSLP <b>VLQVR</b> DV                             |



|               |             |          |                              |                      |
|---------------|-------------|----------|------------------------------|----------------------|
| P48039        | P0DTC1-1201 | VLQVR    | LVLQVRQVRKPD RKPKLKP         | VLQVRDVLVRGFGDS      |
| P48039        | P0DTC1-1213 | VLQVR    | LVLQVRQVRKPD RKPKLKP         | VQLSLPVLQVRDVLV      |
| A0A0C4DGB6-28 | P0DTD1-22   | LPSLA    | PADLPSLAADFVESKD             | FLPSLATV             |
| A0A0C4DGB6-28 | P0DTD1-131  | LPSLA    | PADLPSLAADFVESKD             | FLCLFLPSLATV         |
| A0A0C4DGB6-28 | P0DTD1-493  | LPSLA    | PADLPSLAADFVESKD             | LFLPSLATV            |
| A0A0C4DGB6-28 | P0DTC1-10   | LPSLA    | PADLPSLAADFVESKD             | LCLFLPSLATVAYF       |
| A0A0C4DGB6-28 | P0DTC1-728  | LPSLA    | PADLPSLAADFVESKD             | LLPSLATVAYFNMVY      |
| Q13507        | P0DTC2-23   | ?VVLSF   | PQIISEGLYAIAVVLSFSRIAYILP    | QPYRVVVLSF           |
| Q13507        | P0DTC2-117  | VVLSF    | PQIISEGLYAIAVVLSFSRIAYILP    | VVLSFELLHAPATVC      |
| Q13507        | P0DTC2-136  | ?VVLSF   | PQIISEGLYAIAVVLSFSRIAYILP    | GYQPYRVVVLSF         |
| Q13507        | P0DTC2-233  | ?VVLSF   | PQIISEGLYAIAVVLSFSRIAYILP    | GYQPYRVVVLSFELLHAPAT |
| Q13507        | P0DTC2-368  | ?VVLSF   | PQIISEGLYAIAVVLSFSRIAYILP    | NGVGYPYRVVVLSF       |
| Q13507        | P0DTC2-380  | ?VVLSF   | PQIISEGLYAIAVVLSFSRIAYILP    | QPYRVVVLSFELLHA      |
| Q13507        | P0DTC2-540  | ?VVLSF   | PQIISEGLYAIAVVLSFSRIAYILP    | RVVVLSFELLHAPAT      |
| Q13507        | P0DTC2-574  | ?VVLSF   | PQIISEGLYAIAVVLSFSRIAYILP    | YQPYRVVVLSFELLH      |
| Q13507        | P0DTC2-971  | ?VVLSF   | PQIISEGLYAIAVVLSFSRIAYILP    | NGVGYPHRVVVLSF       |
| Q13507        | P0DTC2-1117 | ?VVLSF   | PQIISEGLYAIAVVLSFSRIAYILP    | RVVVLSFELLHAPATVCGP  |
| Q13507        | P0DTC2-1202 | ?VVLSF   | PQIISEGLYAIAVVLSFSRIAYILP    | GFQPTNGVGYPYRVVVLSF  |
| Q13507        | P0DTC2-1237 | ?VVLSF   | PQIISEGLYAIAVVLSFSRIAYILP    | QPYRVVVLSFELLHAPATVC |
| Q13507        | P0DTC2-1268 | ?VVLSF   | PQIISEGLYAIAVVLSFSRIAYILP    | VGYPYRVVVLSFEL       |
| Q9BYE9        | P0DTC3-8    | ?GVALL?V | QLISVIIGLGVALLLVIMTMA        | IVGVALLAVF           |
| Q9BYE9        | P0DTC3-111  | ?GVALL   | QLISVIIGLGVALLLVIMTMA        | ASLPFGWLIVGVALL      |
| Q9BYE9        | P0DTC1-1023 | LLVLV??T | QLISVIIGLGVALLLVIMTMA        | SLLVLVQSTQWSLFF      |
| P18858        | P0DTC1-235  | ?GKAKK   | QRSIMSFHPKKEGKAKKPEKE<br>ASN | CGNFKVTKGKAKKGA      |
| P18858        | P0DTC1-375  | ?GKAKK   | QRSIMSFHPKKEGKAKKPEKE<br>ASN | ESCGNFKVTKGKAKK      |
| Q8NGD1        | P0DTC1-110  | ???DIQLL | QSQDIQLLVFVLVLIFYF           | NKGEDIQLLKSAYENF     |
| Q8NGD1        | P0DTC1-317  | ?DIQLL   | QSQDIQLLVFVLVLIFYF           | EDIQLLKSAYENFNQ      |
| Q8NGD1        | P0DTC1-619  | ???DIQLL | QSQDIQLLVFVLVLIFYF           | KGEDIQLLKSAYENF      |
| Q8NGD1        | P0DTC1-1207 | ???DIQLL | QSQDIQLLVFVLVLIFYF           | VNKGEDIQLLKSAYE      |
| P62854        | P0DTD1-341  | ???FDAYV | RDISEASVFDAYVLPKLY           | KMFDAYVNTF           |
| P62854        | P0DTD1-559  | ???FDAYV | RDISEASVFDAYVLPKLY           | AEVAVKMFDAYVNTFS     |

|          |             |         |                               |                      |
|----------|-------------|---------|-------------------------------|----------------------|
| P62854   | P0DTD1-703  | ??FDAYV | RDISEASVFDAYVLPKLY            | VKMFDAYVNTFS         |
| P62854   | P0DTC1-135  | ??FDAYV | RDISEASVFDAYVLPKLY            | VKMFDAYVNTFSST       |
| P62854   | P0DTC1-293  | ??FDAYV | RDISEASVFDAYVLPKLY            | DSAEVAVKMFDAYVN      |
| P62854   | P0DTC1-804  | ?FDAYV  | RDISEASVFDAYVLPKLY            | MFDAYVNTFSSTFNV      |
| P62854   | P0DTC1-1156 | ??FDAYV | RDISEASVFDAYVLPKLY            | VAVKMFDAYVNTFSS      |
| P62854   | P0DTC1-1194 | ??FDAYV | RDISEASVFDAYVLPKLY            | VKMFDAYVNTFSSTF      |
| O95425   | P0DTD1-526  | LPTGV   | RSAEGPGLPTGVERERGSRKPR<br>RY  | YMHMELPTGV           |
| O95425   | P0DTC1-503  | LPTGV   | RSAEGPGLPTGVERERGSRKPR<br>RY  | HHMELPTGVHAGTDL      |
| P19875   | P0DTC9-16   | ?ALLLL  | RVALLLLLVAAARR                | LALLLDRL             |
| P19875   | P0DTC9-225  | ALLLL   | RVALLLLLVAAARR                | ALLLDRLNQLESKMS      |
| P19875   | P0DTC9-262  | ?ALLLL  | RVALLLLLVAAARR                | LALLLDRLNQLESKM      |
| P19875   | P0DTC9-363  | ALLLL   | RVALLLLLVAAARR                | ALLLDRLNQLESKMSG     |
| P19875   | P0DTC9-439  | ALLLL   | RVALLLLLVAAARR                | ALLLDRLNQLESKM       |
| P19875   | P0DTC3-139  | LLVAA   | RVALLLLLVAAARR                | LLVAAGLEAPFLYLY      |
| Q8IX21   | P0DTC9-29   | SSRSS   | SRSLSSRSSLSRHHPEESPLGAK<br>FQ | SQASSRSSR            |
| Q8IX21   | P0DTC9-441  | SSRSS   | SRSLSSRSSLSRHHPEESPLGAK<br>FQ | ASSRSSSRNRSSRN       |
| Q8IX21   | P0DTC9-448  | SSRSS   | SRSLSSRSSLSRHHPEESPLGAK<br>FQ | EGSRGGSQASSRSS       |
| Q8IX21   | P0DTC9-501  | SSRSS   | SRSLSSRSSLSRHHPEESPLGAK<br>FQ | SRGGSQASSRSSRS       |
| Q15397   | P0DTC2-137  | AQEKN   | STKTAEKRNRFHKNSD              | HVTYVPAQEKNF         |
| Q15397   | P0DTC2-212  | AQEKN   | STKTAEKRNRFHKNSD              | APHGVVFLHVTYVPAQEKNF |
| Q15397   | P0DTC2-288  | AQEKN   | STKTAEKRNRFHKNSD              | TYVPAQEKNFTTAPAICHDG |
| Q15397   | P0DTC2-565  | AQEKN   | STKTAEKRNRFHKNSD              | VTYVPAQEKNFTTAP      |
| Q15397   | P0DTC2-735  | AQEKN   | STKTAEKRNRFHKNSD              | TYVPAQEKNFT          |
| Q5JNZ5-2 | P0DTD1-341  | ?FDAYV  | SVFDAYVLPKLYVKLHY             | KMFDAYVNTF           |
| Q5JNZ5-2 | P0DTD1-559  | ?FDAYV  | SVFDAYVLPKLYVKLHY             | AEVAVKMFDAYVNTFS     |
| Q5JNZ5-2 | P0DTD1-703  | ?FDAYV  | SVFDAYVLPKLYVKLHY             | VKMFDAYVNTFS         |
| Q5JNZ5-2 | P0DTC2-6    | VKLHY   | SVFDAYVLPKLYVKLHY             | DDSEPVKGVKLHYT       |

|          |             |           |                            |                                                            |
|----------|-------------|-----------|----------------------------|------------------------------------------------------------|
| Q5JNZ5-2 | P0DTC2-100  | VKLHY     | SVFDAYVLPKLY <b>VKLHY</b>  | SEPVLK <b>G</b> <b>VKLHYT</b>                              |
| Q5JNZ5-2 | P0DTC2-226  | VKLHY     | SVFDAYVLPKLY <b>VKLHY</b>  | FDEDDSEPVLK <b>G</b> <b>VKLHYT</b>                         |
| Q5JNZ5-2 | P0DTC2-412  | VKLHY     | SVFDAYVLPKLY <b>VKLHY</b>  | VLK <b>G</b> <b>VKLHY</b>                                  |
| Q5JNZ5-2 | P0DTC2-772  | VKLHY     | SVFDAYVLPKLY <b>VKLHY</b>  | CCSCGSCCKFDEDDSEPVLK <b>G</b> <b>VKLHYT</b>                |
| Q5JNZ5-2 | P0DTC2-779  | VKLHY     | SVFDAYVLPKLY <b>VKLHY</b>  | DEDDSEPVLK <b>G</b> <b>VKLHY</b>                           |
| Q5JNZ5-2 | P0DTC2-787  | VKLHY     | SVFDAYVLPKLY <b>VKLHY</b>  | DSEPVLK <b>G</b> <b>VKLHYT</b>                             |
| Q5JNZ5-2 | P0DTC2-792  | VKLHY     | SVFDAYVLPKLY <b>VKLHY</b>  | EDDSEPVLK <b>G</b> <b>VKLHYT</b>                           |
| Q5JNZ5-2 | P0DTC2-794  | VKLHY     | SVFDAYVLPKLY <b>VKLHY</b>  | EPVLK <b>G</b> <b>VKLHYT</b>                               |
| Q5JNZ5-2 | P0DTC2-924  | VKLHY     | SVFDAYVLPKLY <b>VKLHY</b>  | CCMTSCCCLKGCCSCGSCCKFDEDDSEPVLK <b>G</b> <b>VKLHY</b><br>T |
| Q5JNZ5-2 | P0DTC1-135  | ??FDAYV   | SV <b>FDAYV</b> LPKLYVKLHY | VKM <b>FDAYV</b> NFSSST                                    |
| Q5JNZ5-2 | P0DTC1-293  | ??FDAYV   | SV <b>FDAYV</b> LPKLYVKLHY | DSAEVAVKM <b>FDAYV</b> N                                   |
| Q5JNZ5-2 | P0DTC1-804  | ?FDAYV    | SV <b>FDAYV</b> LPKLYVKLHY | M <b>FDAYV</b> NFSSSTFNV                                   |
| Q5JNZ5-2 | P0DTC1-1156 | ??FDAYV   | SV <b>FDAYV</b> LPKLYVKLHY | VAVKM <b>FDAYV</b> NTFSS                                   |
| Q5JNZ5-2 | P0DTC1-1194 | ??FDAYV   | SV <b>FDAYV</b> LPKLYVKLHY | VKM <b>FDAYV</b> NFSSSTF                                   |
| Q9HC29   | P0DTD1-125  | LAKNV     | VGAQALALM <b>LAKNV</b>     | AE <b>LAKNV</b> SLDNVL                                     |
| Q9HC29   | P0DTD1-242  | LAKNV     | VGAQALALM <b>LAKNV</b>     | AE <b>LAKNV</b> SL                                         |
| Q9HC29   | P0DTD1-255  | LAKNV     | VGAQALALM <b>LAKNV</b>     | AEAE <b>LAKNV</b>                                          |
| Q9HC29   | P0DTC1-129  | LAKNV     | VGAQALALM <b>LAKNV</b>     | TLVATAEAE <b>LAKNV</b> SL                                  |
| Q9HC29   | P0DTC1-166  | LAKNV     | VGAQALALM <b>LAKNV</b>     | AE <b>LAKNV</b> SLDNVLST                                   |
| Q9HC29   | P0DTC1-212  | LAKNV     | VGAQALALM <b>LAKNV</b>     | ATAEAE <b>LAKNV</b> SLDN                                   |
| Q9HC29   | P0DTC1-666  | LAKNV     | VGAQALALM <b>LAKNV</b>     | <b>LAKNV</b> SLDNVLSTFI                                    |
| Q9HC29   | P0DTC1-787  | LAKNV     | VGAQALALM <b>LAKNV</b>     | LVATAEAE <b>LAKNV</b> SL                                   |
| P62937-3 | P0DTD1-970  | TVFFD     | VNPT <b>TVFFD</b> IAVD     | KPTETICAPL <b>TVFFD</b>                                    |
| P62937-3 | P0DTD1-1098 | TVFFD??VD | VNPT <b>TVFFD</b> IAVD     | PL <b>TVFFD</b> GRVDGQVD                                   |
| P62937-3 | P0DTD1-1197 | TVFFD     | VNPT <b>TVFFD</b> IAVD     | TETICAPL <b>TVFFD</b> GR                                   |
| P62937-3 | P0DTD1-1202 | TVFFD??VD | VNPT <b>TVFFD</b> IAVD     | TICAPL <b>TVFFD</b> GRVD                                   |
| P62937-3 | P0DTD1-1234 | TVFFD??VD | VNPT <b>TVFFD</b> IAVD     | <b>TVFFD</b> GRVDGQVDLF                                    |
| Q96L11   | P0DTD1-77   | PILLL     | VP <b>PILLL</b> LQVKP      | QLMCQ <b>PILLL</b>                                         |
| Q96L11   | P0DTC1-24   | PILLL?Q   | VP <b>PILLL</b> LQVKP      | CQ <b>PILLL</b> DQALVSDV                                   |
| Q96L11   | P0DTC1-736  | PILLL?Q   | VP <b>PILLL</b> LQVKP      | LMCQ <b>PILLL</b> DQALVS                                   |
| Q96L11   | P0DTC1-894  | PILLL?Q   | VP <b>PILLL</b> LQVKP      | <b>PILLL</b> DQALVSDVGD                                    |
| Q96L11   | P0DTC1-1028 | PILLL?Q   | VP <b>PILLL</b> LQVKP      | SQLMCQ <b>PILLL</b> DQAL                                   |

|        |             |         |              |                              |
|--------|-------------|---------|--------------|------------------------------|
| Q96L11 | P0DTC1-1045 | PILLL   | VPILLLLQVKP  | SVYYSQLMCQPILLL              |
| Q96L11 | P0DTC1-1291 | PILLL?Q | VPILLLLQVKP  | YYSQLMCQPILLLDQ              |
| Q9Y657 | P0DTC1-12   | RGMVL   | WRGMVLARAPVM | LNNLN <del>RGMVL</del> GSLAA |
| Q9Y657 | P0DTC1-418  | RGMVL   | WRGMVLARAPVM | FIKGLNNLN <del>RGMVL</del> G |
| Q9Y657 | P0DTC1-623  | RGMVL   | WRGMVLARAPVM | KGLNNLN <del>RGMVL</del> GSL |
| Q9Y657 | P0DTC1-860  | RGMVL   | WRGMVLARAPVM | NLN <del>RGMVL</del> GSLAATV |

**Supplementary Table S2:** Matching 6-mer linear motifs found in the consensus sequences between SARS-CoV-2 epitopes and autoreactive epitopes found in MS, with the 6-mer motif highlighted in their epitope sequences.

| MS epitope ID | COVID-19 epitope ID | Consensus sequence | MS epitope sequence             | COVID-19 epitope sequence     |
|---------------|---------------------|--------------------|---------------------------------|-------------------------------|
| P10809-2      | P0DTD1-697          | ??EIPKEE           | VVT <del>EIPKEE</del> KDPGM     | VEQKIA <del>EIPKEE</del>      |
| P10809-2      | P0DTC1-165          | ?EIPKEE??P         | VVT <del>EIPKEE</del> KDPGM     | A <del>EIPKEE</del> VKPFITES  |
| P10809-2      | P0DTC1-352          | ??EIPKEE           | VVT <del>EIPKEE</del> KDPGM     | EKQVEQKIA <del>EIPKEE</del>   |
| P10809-2      | P0DTC1-372          | ??EIPKEE??P        | VVT <del>EIPKEE</del> KDPGM     | EQKIA <del>EIPKEE</del> VKPF  |
| P10809-2      | P0DTC1-628          | ??EIPKEE??P        | VVT <del>EIPKEE</del> KDPGM     | KIA <del>EIPKEE</del> VKPFIT  |
| P0DP02        | P0DTD1-151          | YYRARA             | AV <del>YYRARARL</del>          | <del>YYRARAGEAANF</del>       |
| P0DP02        | P0DTC1-190          | ?YYRARA            | AV <del>YYRARARL</del>          | ALQDAY <del>YYRARAGEAA</del>  |
| P0DP02        | P0DTC1-905          | ?YYRARA            | AV <del>YYRARARL</del>          | PPALQDAY <del>YYRARAGE</del>  |
| P0DP02        | P0DTC1-925          | ?YYRARA            | AV <del>YYRARARL</del>          | QDAY <del>YYRARAGEAANF</del>  |
| P62861-1      | P0DTC1-721          | LARAGK             | KVHGS <del>LARAGK</del> VRGQTPK | <del>LLARAGK</del> ASCTLSEQ   |
| P62861-1      | P0DTC1-1283         | LARAGK             | KVHGS <del>LARAGK</del> VRGQTPK | YPLECIKDL <del>LARAGK</del>   |
| P62736-3      | P0DTC1-353          | EKSYEL             | SLE <del>EKSYEL</del> PDGQVI    | <del>EKSYEL</del> QTPFEIKLA   |
| P62736-3      | P0DTC1-528          | EKSYEL             | SLE <del>EKSYEL</del> PDGQVI    | IAWYTERSE <del>EKSYEL</del> Q |
| P62736-3      | P0DTC1-1076         | EKSYEL             | SLE <del>EKSYEL</del> PDGQVI    | TERSE <del>EKSYEL</del> QTPFE |
| P62736-3      | P0DTC1-1251         | EKSYEL             | SLE <del>EKSYEL</del> PDGQVI    | WYTERSE <del>EKSYEL</del> QTP |
| P02489        | P0DTD1-57           | DDFVEI             | <del>DDFVEI</del> HGKHNERQD     | LLL <del>DDFVEI</del>         |
| P02489        | P0DTD1-137          | DDFVEI             | <del>DDFVEI</del> HGKHNERQD     | LLL <del>DDFVEI</del>         |
| P02489        | P0DTD1-195          | DDFVEI             | <del>DDFVEI</del> HGKHNERQD     | L <del>DDFVEI</del> IKSQDLSV  |
| P02489        | P0DTD1-775          | DDFVEI             | <del>DDFVEI</del> HGKHNERQD     | CSVIDLLL <del>DDFVEI</del>    |
| P02489        | P0DTD1-782          | DDFVEI             | <del>DDFVEI</del> HGKHNERQD     | <del>DDFVEI</del> IKSQDLSVV   |
| P02489        | P0DTD1-797          | DDFVEI             | <del>DDFVEI</del> HGKHNERQD     | DLLL <del>DDFVEI</del> IKSQD  |

|          |             |         |                           |                                             |
|----------|-------------|---------|---------------------------|---------------------------------------------|
| P02489   | P0DTD1-1011 | DDFVEI  | DDFVEIHGKHNERQD           | LLDDFVEIIKSQDLS                             |
| P02489   | P0DTD1-1255 | DDFVEI  | DDFVEIHGKHNERQD           | VIDLLLDDFVEIIKS                             |
| P09972-8 | P0DTC5-3    | VLAAVY? | VLAAVYKALSDHHVY           | FVLAAVYRI                                   |
| P09972-8 | P0DTC5-52   | VLAAVY? | VLAAVYKALSDHHVY           | TLACFVLAAVYRINW                             |
| P09972-8 | P0DTC5-129  | VLAAVY? | VLAAVYKALSDHHVY           | VLAAVYRINWITGGI                             |
| P62736-6 | P0DTC1-353  | EKSYEL  | SSSSLEKSYELPDGQVI         | EKSYELQTPFEIKLA                             |
| P62736-6 | P0DTC1-528  | EKSYEL  | SSSSLEKSYELPDGQVI         | IAWYTERSEKSYELQ                             |
| P62736-6 | P0DTC1-1076 | EKSYEL  | SSSSLEKSYELPDGQVI         | TERSEKSYELQTPFE                             |
| P62736-6 | P0DTC1-1251 | EKSYEL  | SSSSLEKSYELPDGQVI         | WYTERSEKSYELQTP                             |
| Q16695-3 | P0DTC8-3    | ARKSAP  | VARKSAPATGGVKKPHRYRPGTVAL | RVGARKSAPL                                  |
| Q16695-3 | P0DTC8-9    | ARKSAP  | VARKSAPATGGVKKPHRYRPGTVAL | SKWYIRVGARKSAPL                             |
| Q16695-3 | P0DTC8-11   | ARKSAP  | VARKSAPATGGVKKPHRYRPGTVAL | YIRVGARKSAPLIEL                             |
| Q16695-3 | P0DTC8-12   | ARKSAP  | VARKSAPATGGVKKPHRYRPGTVAL | ARKSAPLIELCVDEA                             |
| Q16695-3 | P0DTC8-68   | ARKSAP  | VARKSAPATGGVKKPHRYRPGTVAL | GARKSAPLIELCVDE                             |
| Q16695-3 | P0DTC8-82   | ARKSAP  | VARKSAPATGGVKKPHRYRPGTVAL | RVGARKSAPLIELCV                             |
| P25440   | P0DTD1-424  | KKGAKL  | KKGAKLAALQGS              | TPSFKKGAKLLHKPI                             |
| P25440   | P0DTD1-580  | KKGAKL  | KKGAKLAALQGS              | PDLNGDVVAIDYKHYTPSFKKGAKLLHK<br>PIVWHVNNATN |
| P25440   | P0DTC1-518  | KKGAKL  | KKGAKLAALQGS              | HYTPSFKKGAKLLHK                             |
| P25440   | P0DTC1-1006 | KKGAKL  | KKGAKLAALQGS              | SFKKGAKLLHKPIVW                             |
| P57073   | P0DTC9-3    | APSASA  | KSAPSASASPT               | APSASAFFGM                                  |
| P57073   | P0DTC9-4    | APSASA  | KSAPSASASPT               | AQFAPSASA                                   |
| P57073   | P0DTC9-5    | APSASA  | KSAPSASASPT               | AQFAPSASAFFGMSR                             |
| P57073   | P0DTC9-38   | APSASA  | KSAPSASASPT               | FAPSASAFF                                   |
| P57073   | P0DTC9-73   | APSASA  | KSAPSASASPT               | WPQIAQFAPSASAFF                             |
| P57073   | P0DTC9-103  | APSASA  | KSAPSASASPT               | QFAPSASAFFGMSRI                             |
| P57073   | P0DTC9-107  | APSASA  | KSAPSASASPT               | AQFAPSASAF                                  |
| P57073   | P0DTC9-178  | APSASA  | KSAPSASASPT               | QFAPSASAFF                                  |
| P57073   | P0DTC9-440  | APSASA  | KSAPSASASPT               | APSASAFFGMSRIGM                             |
| P57073   | P0DTC9-461  | APSASA  | KSAPSASASPT               | IAQFAPSASAFFGMS                             |
| Q8N729   | P0DTC9-16   | LALLLL  | APASRPRLALLLLLLLLPLP      | LALLLLDRL                                   |
| Q8N729   | P0DTC9-42   | LALLLL  | APASRPRLALLLLLLLLPLP      | GDAAALLLLDRLNQL                             |
| Q8N729   | P0DTC9-93   | LALLLL  | APASRPRLALLLLLLLLPLP      | DAALLLLDRLNQL                               |

|        |            |               |                           |                                             |
|--------|------------|---------------|---------------------------|---------------------------------------------|
| Q8N729 | P0DTC9-118 | LALLLL        | APASRPR LALLLL LLLPLP     | PARMAGNGGDAA LALLLDRLNQLESK<br>MSGKGQQQQGQ  |
| Q8N729 | P0DTC9-120 | LALLLL        | APASRPR LALLLL LLLPLP     | AA LALLLDRLNQLE                             |
| Q8N729 | P0DTC9-157 | LALLLL        | APASRPR LALLLL LLLPLP     | AGNGGDAA LALLLD                             |
| Q8N729 | P0DTC9-216 | LALLLL        | APASRPR LALLLL LLLPLP     | AA LALLLDRLNQLES                            |
| Q8N729 | P0DTC9-221 | LALLLL        | APASRPR LALLLL LLLPLP     | AGNGGDAA LALLLDR                            |
| Q8N729 | P0DTC9-224 | LALLLL        | APASRPR LALLLL LLLPLP     | A LALLLDRLNQLESK                            |
| Q8N729 | P0DTC9-229 | LALLLL        | APASRPR LALLLL LLLPLP     | ARMAGNGGDAA LALLLDRLNQLESK<br>MSGKG         |
| Q8N729 | P0DTC9-231 | LALLLL        | APASRPR LALLLL LLLPLP     | DAA LALLLDRLNQLE                            |
| Q8N729 | P0DTC9-245 | LALLLL        | APASRPR LALLLL LLLPLP     | GGDAA LALLLDRLNQ                            |
| Q8N729 | P0DTC9-249 | LALLLL        | APASRPR LALLLL LLLPLP     | GNGGDAA LALLLDRL                            |
| Q8N729 | P0DTC9-262 | LALLLL        | APASRPR LALLLL LLLPLP     | LALLLDRLNQLESKM                             |
| Q8N729 | P0DTC9-277 | LALLLL        | APASRPR LALLLL LLLPLP     | MAGNGGDAA LALLLD                            |
| Q8N729 | P0DTC9-282 | LALLLL        | APASRPR LALLLL LLLPLP     | NGGDAA LALLLDRLN                            |
| Q8N729 | P0DTC9-313 | LALLLL        | APASRPR LALLLL LLLPLP     | RMAGNGGDAA LALLL                            |
| Q8N729 | P0DTC9-339 | LALLLL        | APASRPR LALLLL LLLPLP     | SSRGTSPARMAGNGGDAA LALLLDRL<br>NQLESKMSGKGQ |
| Q8N729 | P0DTC9-359 | LALLLL        | APASRPR LALLLL LLLPLP     | AA LALLLDRLNQLESKMS                         |
| Q8N729 | P0DTC9-394 | LALLLL        | APASRPR LALLLL LLLPLP     | MAGNGGDAA LALLLDR                           |
| Q8N729 | P0DTC9-417 | LALLLL        | APASRPR LALLLL LLLPLP     | RMAGNGGDAA LALLLDRL                         |
| Q8N729 | P0DTC9-438 | LALLLL        | APASRPR LALLLL LLLPLP     | A LALLLDRLNQLES                             |
| Q8N729 | P0DTC9-453 | LALLLL        | APASRPR LALLLL LLLPLP     | GGDAA LALLLDRLN                             |
| Q8N729 | P0DTC9-456 | LALLLL        | APASRPR LALLLL LLLPLP     | GNGGDAA LALLLDR                             |
| Q8N729 | P0DTC9-480 | LALLLL        | APASRPR LALLLL LLLPLP     | MAGNGGDAA LALLL                             |
| Q9NWB7 | P0DTC2-99  | RKSNLK        | KLKLLRYEEFL RKSNLKAPSRHYF | RKSNLKPFERDISTE                             |
| Q9NWB7 | P0DTC2-119 | Y?????RKSNLK  | KLKLLRYEEFL RKSNLKAPSRHYF | YLYRLF RKSNLKPFE                            |
| Q9NWB7 | P0DTC2-159 | ???RKSNLK     | KLKLLRYEEFL RKSNLKAPSRHYF | RLF RKSNLK                                  |
| Q9NWB7 | P0DTC2-242 | ?Y?????RKSNLK | KLKLLRYEEFL RKSNLKAPSRHYF | KVGGNYNYLYRLF RKSNLKP                       |
| Q9NWB7 | P0DTC2-272 | ???RKSNLK     | KLKLLRYEEFL RKSNLKAPSRHYF | RLF RKSNLKPFERDISTEY                        |
| Q9NWB7 | P0DTC2-330 | ?RKSNLK       | KLKLLRYEEFL RKSNLKAPSRHYF | FRKSNLKPFERDIST                             |
| Q9NWB7 | P0DTC2-452 | ???RKSNLK     | KLKLLRYEEFL RKSNLKAPSRHYF | RLF RKSNLKP                                 |
| Q9NWB7 | P0DTC2-572 | ?Y?????RKSNLK | KLKLLRYEEFL RKSNLKAPSRHYF | YNYLYRLF RKSNLKP                            |

|        |             |               |                                    |                                                          |
|--------|-------------|---------------|------------------------------------|----------------------------------------------------------|
| Q9NWB7 | P0DTC2-576  | ???RKSNLK     | KLKLLRYEEEF <b>LRKSNLK</b> APSRHYF | YRLF <b>FRKSNLK</b> PFERD                                |
| Q9NWB7 | P0DTC2-713  | ?Y?????RKSNLK | KLKLLRYEEEF <b>LRKSNLK</b> APSRHYF | VGGNYNYLYRLF <b>FRKSNLK</b> P                            |
| Q9NWB7 | P0DTC2-725  | ?Y?????RKSNLK | KLKLLRYEEEF <b>LRKSNLK</b> APSRHYF | LDSKVGGNYNYLYRLF <b>FRKSNLK</b> PF                       |
| Q9NWB7 | P0DTC2-742  | ??RKSNLK      | KLKLLRYEEEF <b>LRKSNLK</b> APSRHYF | LF <b>FRKSNLK</b> PFERDIS                                |
| Q9NWB7 | P0DTC2-951  | ?Y?????RKSNLK | KLKLLRYEEEF <b>LRKSNLK</b> APSRHYF | GGNYNYLYRLF <b>FRKSNLK</b> PFERDI                        |
| Q9NWB7 | P0DTC2-1025 | ?RKSNLK       | KLKLLRYEEEF <b>LRKSNLK</b> APSRHYF | <b>FRKSNLK</b> PFERD                                     |
| Q9NWB7 | P0DTC2-1115 | ???RKSNLK     | KLKLLRYEEEF <b>LRKSNLK</b> APSRHYF | RLF <b>FRKSNLK</b> PFE                                   |
| Q9NWB7 | P0DTC2-1196 | ?RKSNLK       | KLKLLRYEEEF <b>LRKSNLK</b> APSRHYF | <b>FRKSNLK</b> PFERDISTEIYQA                             |
| Q9NWB7 | P0DTC2-1204 | ?Y?????RKSNLK | KLKLLRYEEEF <b>LRKSNLK</b> APSRHYF | GGNYNYLYRLF <b>FRKSNLK</b> PFE                           |
| Q9NTJ3 | P0DTC2-24   | KVEAEV        | <b>KVEAEV</b> KRLH                 | RLD <b>KVEAEV</b>                                        |
| Q9NTJ3 | P0DTC2-38   | KVEAEV?       | <b>KVEAEV</b> KRLH                 | DILSRD <b>KVEAEV</b> QI                                  |
| Q9NTJ3 | P0DTC2-292  | KVEAEV?       | <b>KVEAEV</b> KRLH                 | VLNDILSRD <b>KVEAEV</b> QIDR                             |
| Q9NTJ3 | P0DTC2-362  | KVEAEV?       | <b>KVEAEV</b> KRLH                 | LSRD <b>KVEAEV</b> QIDR                                  |
| Q9NTJ3 | P0DTC2-508  | KVEAEV        | <b>KVEAEV</b> KRLH                 | LNDILSRD <b>KVEAEV</b>                                   |
| Q9NTJ3 | P0DTC2-755  | KVEAEV?       | <b>KVEAEV</b> KRLH                 | NTLVKQLSSNFGAISSVLNDILSRD <b>KVEAEV</b> QIDRLITGRLQSLQTY |
| Q9NTJ3 | P0DTC2-933  | KVEAEV?       | <b>KVEAEV</b> KRLH                 | LSRD <b>KVEAEV</b> QIDRLITGR                             |
| Q9NTJ3 | P0DTC2-1069 | KVEAEV?       | <b>KVEAEV</b> KRLH                 | LSRD <b>KVEAEV</b> QID                                   |
| Q9NTJ3 | P0DTC2-1243 | KVEAEV?       | <b>KVEAEV</b> KRLH                 | RLD <b>KVEAEV</b> QIDRLI                                 |
| P19875 | P0DTC3-125  | LLLVA         | RVALL <b>LLLVA</b> ASRR            | H <b>LLLVA</b> AGLEAPFLY                                 |
| P19875 | P0DTC3-169  | LLLVA         | RVALL <b>LLLVA</b> ASRR            | YSH <b>LLLVA</b> AGLEAPF                                 |
